# Supplementary material
Source: PubMed Central journal article supplement (PMC3801070)
Supplement: 1311528110_sapp.pdf [file 1311528110_sapp.pdf]

## Supplementary Information

| Page Number | Figure                                                                                                                                     |
|-------------|--------------------------------------------------------------------------------------------------------------------------------------------|
| S6          | The proportion of global plant species that are under threat of extinction                                                                 |
| S6          | Primary threats to plant life                                                                                                              |
| S7          | Selected commercially available drugs of plant origin                                                                                      |
| S8          | Structures of selected anti-HCV and anti PTP1B active compounds                                                                            |
| S9          | Prevalence of chronic HCV infection from WHO International Travel Health (top) and cases of DM in 2000 and projections for 2030 (Millions) |
| S10         | Selected species from the family Asteraceae                                                                                                |
| S11-S12     | Isolation and purification of rhododendrosaponins <b>I-III</b>                                                                             |
| S13         | MS chromatogram of rhododendrosaponin <b>I</b>                                                                                             |
| S14-S15     | Identification                                                                                                                             |
| S16-S17     | <sup>1</sup> H NMR of rhododendrosaponin <b>I</b>                                                                                          |
| S18         | <sup>13</sup> C NMR of rhododendrosaponin <b>I</b>                                                                                         |
| S19         | 135° DEPT of rhododendrosaponin <b>I</b>                                                                                                   |
| S20         | HSQC spectrum of rhododendrosaponin <b>I</b>                                                                                               |

# Supplementary Information

| Page Number | Figure                                                                              |
|-------------|-------------------------------------------------------------------------------------|
| S21         | MS chromatogram of rhododendrosaponin <b>II</b>                                     |
| S22         | <sup>1</sup> H NMR of rhododendrosaponin <b>II</b>                                  |
| S23         | <sup>13</sup> C NMR of rhododendrosaponin <b>II</b>                                 |
| S24         | MS chromatogram of rhododendrosaponin <b>III</b>                                    |
| S25         | <sup>1</sup> H NMR of rhododendrosaponin <b>III</b>                                 |
| S26         | <sup>13</sup> C NMR of rhododendrosaponin <b>III</b>                                |
| S27         | NOESY spectrum of rhododendrosaponin <b>III</b>                                     |
| S28         | Selected HMBC correlations of the aglycone triterpene                               |
| S29         | GC/MS detection of 3-hydroxybutanoate in rhododendrosaponin <b>III</b>              |
| S30         | HMBC correlations of 3-hydroxybutanoate dimer in rhododendrosaponin <b>III</b>      |
| S31         | Identification and determination of the carbohydrate units                          |
| S32         | The total carbohydrate content of the major glycoside rhododendrosaponin <b>III</b> |
| S33         | Glycosyl linkage analysis                                                           |
| S34         | NSI-MS <sup>n</sup> fragmentation of rhododendrosaponin <b>III</b>                  |
| S35         | The absolute configuration determination of the carbohydrate units                  |

## Supplementary Information

| Page Number | Figure                                                                                                             |
|-------------|--------------------------------------------------------------------------------------------------------------------|
| S36         | An investigational method for carbohydrate analysis                                                                |
| S37         | L- and D- glucose, xylose, and fucose standards by the carbohydrate analysis method                                |
| S38         | Carbohydrate analysis for rhododendrosaponin <b>III</b>                                                            |
| S39         | Overlay of the carbohydrate analysis chromatograms of rhododendrosaponins <b>I</b> and <b>III</b>                  |
| S40         | Overlaying 2D NMR experiments                                                                                      |
| S41         | Overlaid HSQC spectra of rhododendrosaponins <b>I</b> and <b>III</b>                                               |
| S42         | The expanded HSQC spectrum of rhododendrosaponin <b>I</b>                                                          |
| S43         | The expanded HMBC spectrum of rhododendrosaponin <b>I</b>                                                          |
| S44         | The expanded ROESY spectrum of rhododendrosaponin <b>I</b>                                                         |
| S45         | $135^\circ$ DEPT spectrum of rhododendrosaponin <b>I</b> shows the presence of (-CHO) for the acyclic intermediate |
| S47         | Overlaid HSQC spectra of rhododendrosaponins <b>II</b> and <b>III</b>                                              |
| S48         | The $^{13}\text{C}$ NMR spectrum of rhododendrosaponin <b>II</b>                                                   |
| S49         | Expanded HMBC spectrum of rhododendrosaponin <b>II</b>                                                             |

## Supplementary Information

| Page Number | Figure                                                                                              |
|-------------|-----------------------------------------------------------------------------------------------------|
| S50         | Co-injection of rhododendrosaponins <b>II</b> and <b>III</b> on 250 × 4.6 mm NH <sub>2</sub> column |
| S52         | GC chromatograms of (R) and (S)-methyl 3-hydroxybutanoate.                                          |
| S53         | GC chromatograms of rhododendrosaponins <b>I-III</b> after methanolysis                             |
| S54         | The proposed structures of rhododendrosaponins <b>I-III</b>                                         |
| S56         | The minimized 3D structure surface generated for rhododendrosaponin <b>III</b>                      |
| S58         | Anti-HCV activity of rhododendrosaponins <b>I-III</b> in Huh-7 replicon cells                       |
| S60         | LC- HRESIMS Spectrum of Compound <b>IV</b>                                                          |
| S61         | <sup>1</sup> H NMR Spectrum of Compound <b>IV</b> in Pyridine- <i>d</i> <sub>5</sub> (400 MHz)      |
| S62         | <sup>13</sup> C NMR Spectrum of Compound <b>IV</b> in Pyridine- <i>d</i> <sub>5</sub> (100 MHz)     |
| S63         | COSY Spectrum of Compound <b>IV</b> in Pyridine- <i>d</i> <sub>5</sub> (400 MHz)                    |
| S64         | HMQC Spectrum of Compound <b>IV</b> in Pyridine- <i>d</i> <sub>5</sub> (400 MHz)                    |
| S65         | HMBC Spectrum of Compound <b>IV</b> in Pyridine- <i>d</i> <sub>5</sub> (400 MHz)                    |
| S66         | LC- HRESIMS Spectrum of Compound <b>V</b>                                                           |

## Supplementary Information

| Page Number | Figure                                                                         |
|-------------|--------------------------------------------------------------------------------|
| S67         | $^1\text{H}$ NMR Spectrum of Compound <b>V</b> in Methanol- $d_4$ (400 MHz)    |
| S68         | $^{13}\text{C}$ NMR Spectrum of Compound <b>V</b> in Methanol- $d_4$ (100 MHz) |
| S69         | COSY Spectrum of Compound <b>V</b> in Methanol- $d_4$ (400 MHz)                |
| S70         | HMQC Spectrum of Compound <b>V</b> in Methanol- $d_4$ (400 MHz)                |
| S71         | HMBC Spectrum of Compound <b>V</b> in Methanol- $d_4$ (400 MHz)                |
| S72         | The proposed structures of <b>IV</b> and <b>V</b>                              |
| S73         | Docking scores of compounds <b>IV</b> and <b>V</b>                             |
| S73         | The structures of legends <b>A</b> , <b>B</b> , and <b>C</b>                   |
| S74         | Additional references                                                          |

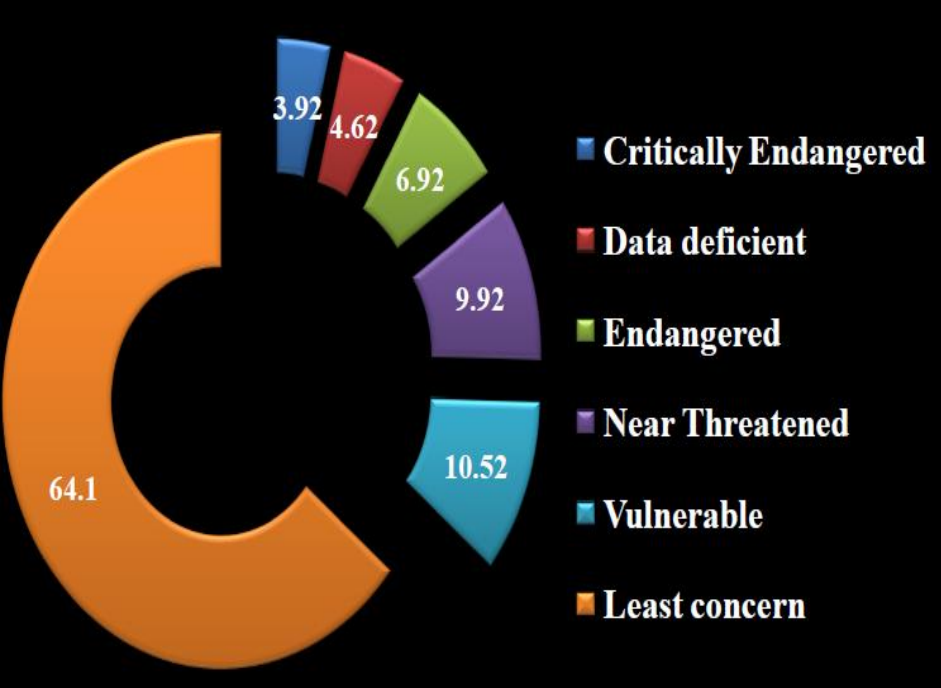

**Supplementary Figure 1 | The proportion of global plant species that are under threat of extinction (data from Royal Botanic Gardens, Kew)**

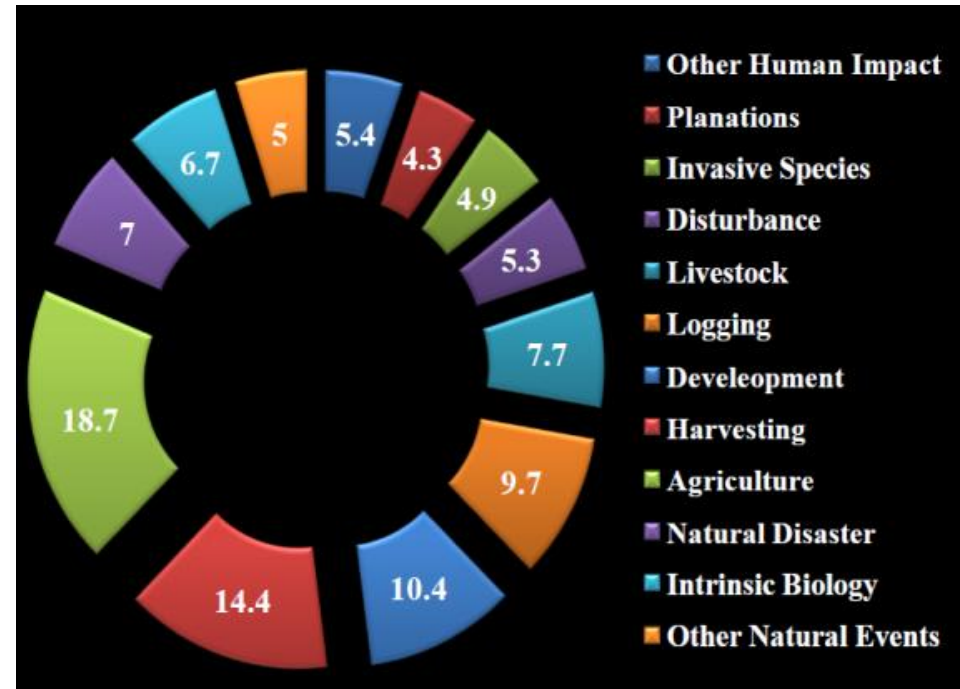

**Supplementary Figure 2 | Primary threats to plant life (data from Royal Botanic Gardens, Kew)**

- The Royal Botanic Gardens, founded in 1759, and declared a UNESCO World Heritage Site in 2003. The risk assessment, called the Sampled Red List Index for Plants, was conducted by plant scientists at the Royal Botanic Gardens, Kew, UK.

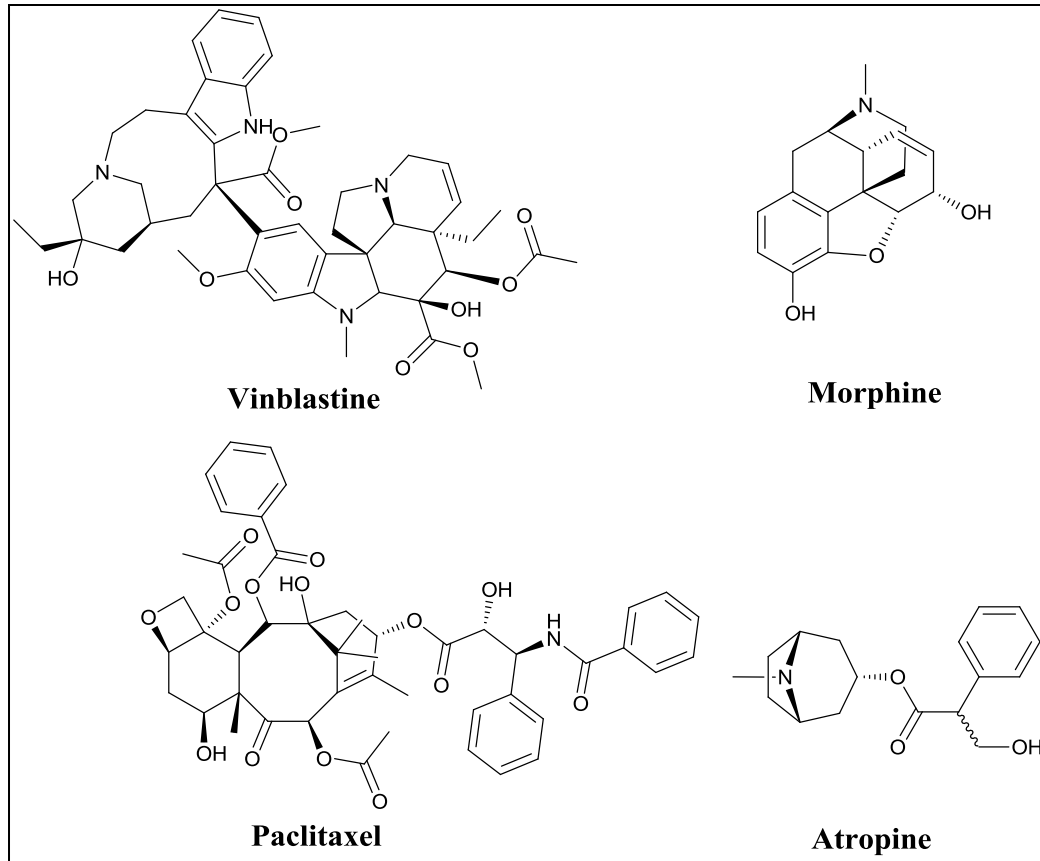

**Supplementary Figure 3 | Selected commercially available drugs of plant origin**

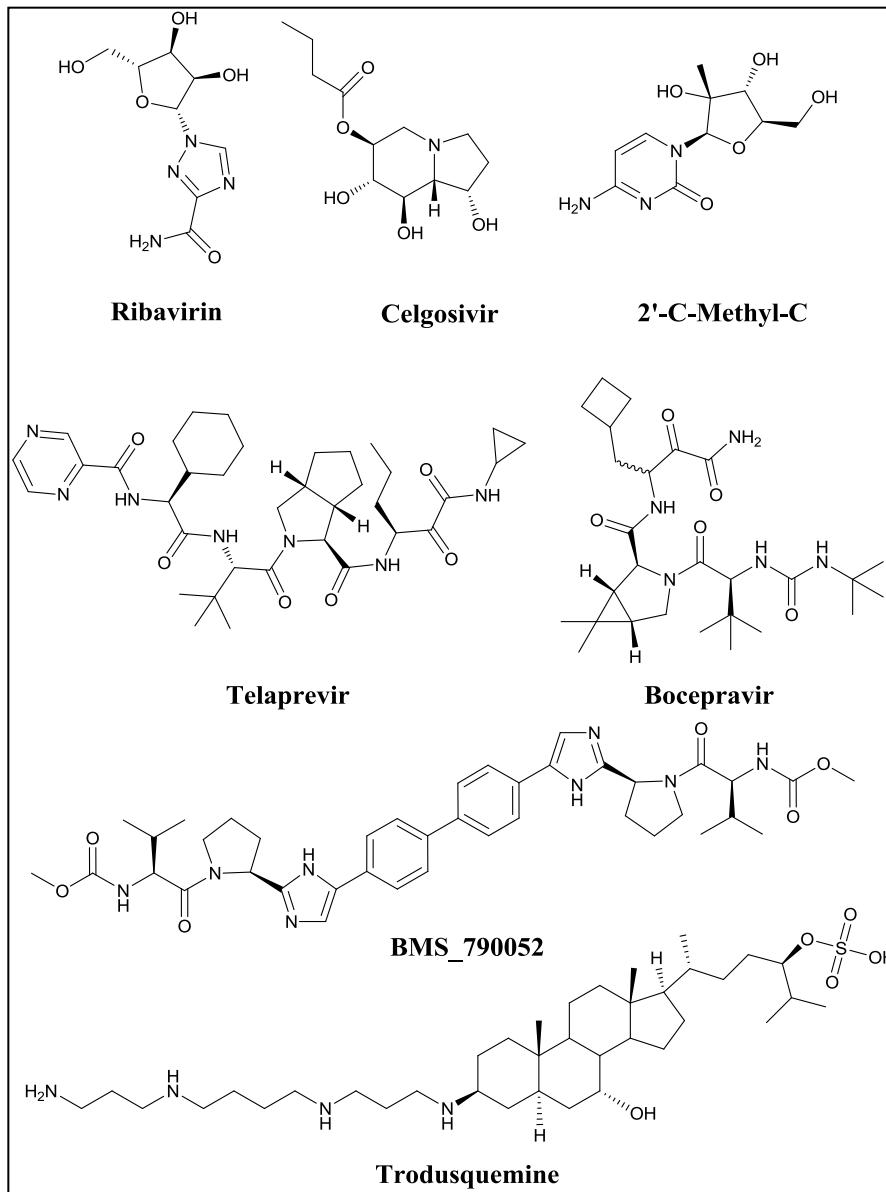

**Supplementary Figure 4 | Structures of selected anti-HCV and anti PTP1B active compounds**



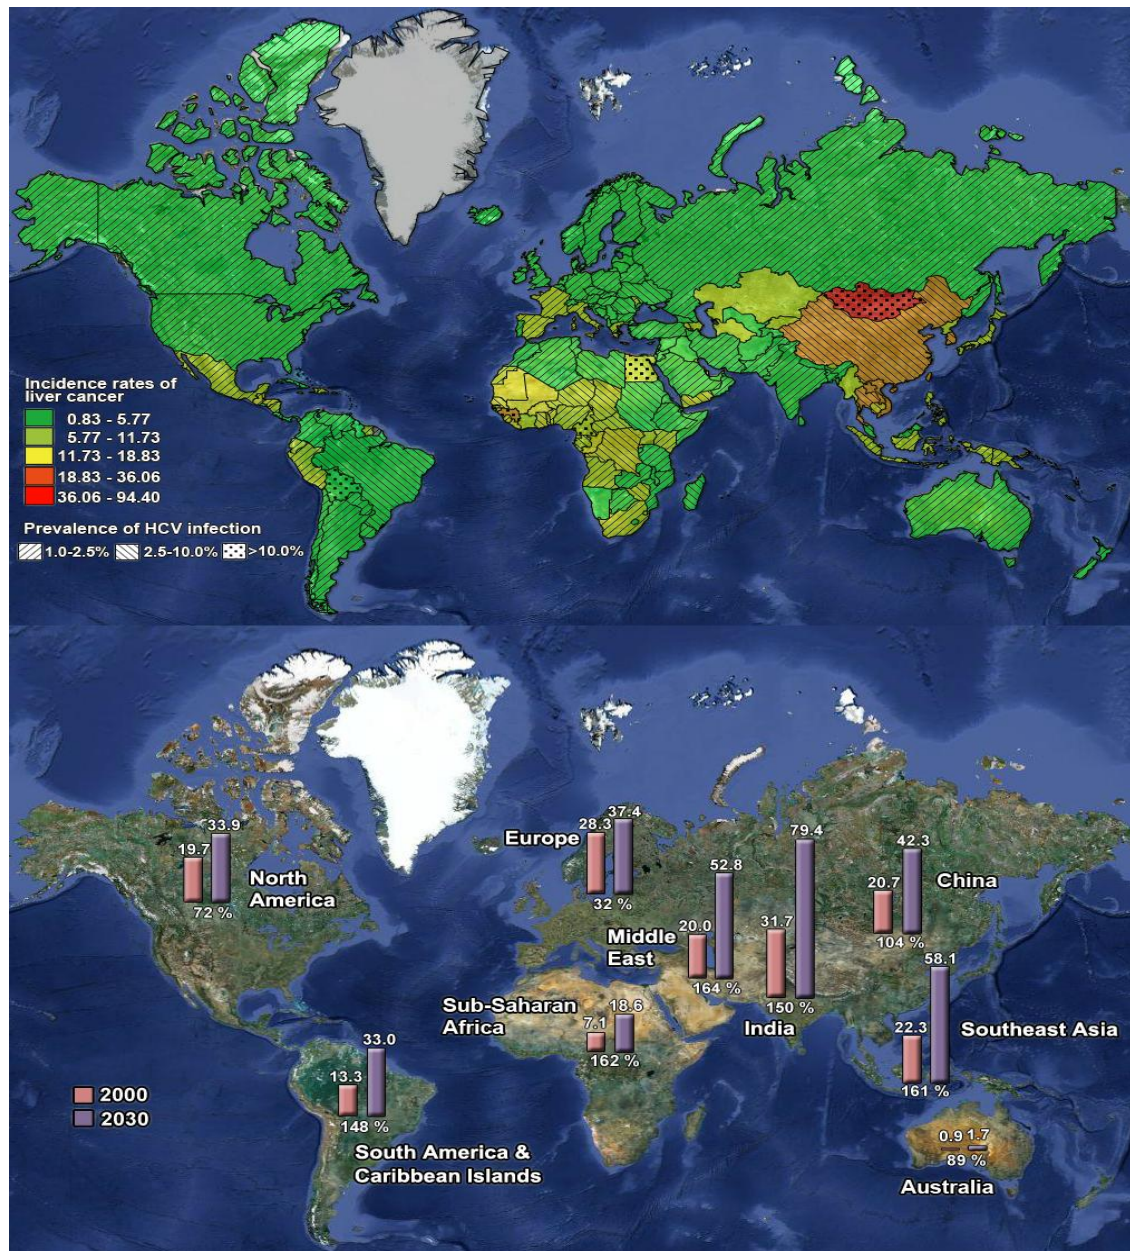

Supplementary Figure 5 | Estimated age-standardized incidence rate per 100,000 for liver cancer from GLOBOCAN 2008; prevalence of chronic HCV infection from WHO International Travel Health (top) and cases of DM in 2000 and projections for 2030 (Millions)

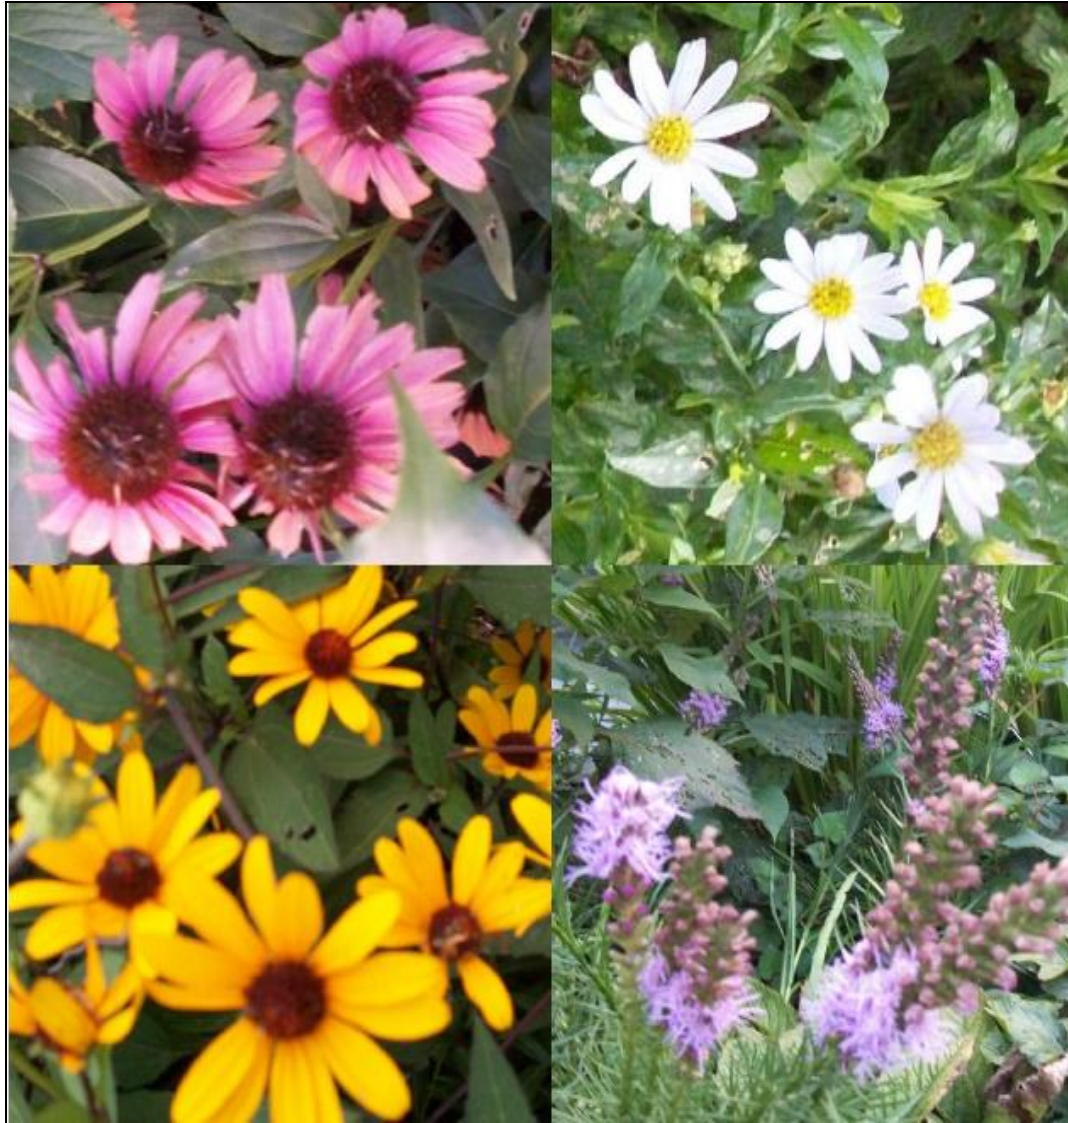

**Supplementary Figure 6 | Selected species from the family Asteraceae; from the left above clockwise: *Echinacea purpurea*, *Kalimeris incise*, *Heliopsis helianthoides*, and *Liatris spicata*. (photo credit: M. A. Ibrahim)**

## Isolation

- The extraction started with a rapid solvent elution utilizing MeOH-DCM, where the active metabolites were extracted in DCM-MeOH (25:75), followed by HPLC on 250 × 21.2 mm C<sub>18</sub> column with MeOH-H<sub>2</sub>O, where the active material eluted off the column as a broad signal by the end of the elution. The material representing this broad signal was subjected to 250 × 21.2 mm NH<sub>2</sub> column with CHCl<sub>3</sub>-MeOH to yield three UV inactive metabolites. The three resolved metabolites were further subjected to 250 × 4.6 mm NH<sub>2</sub>, and the co-injection of metabolites **2** and **3** on 250 × 4.6 mm NH<sub>2</sub> column was also completed.

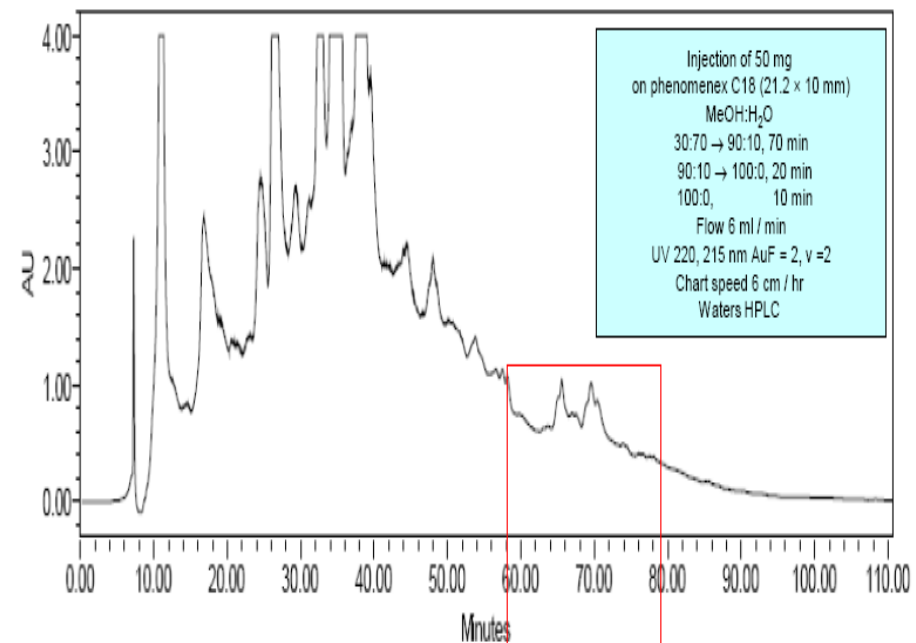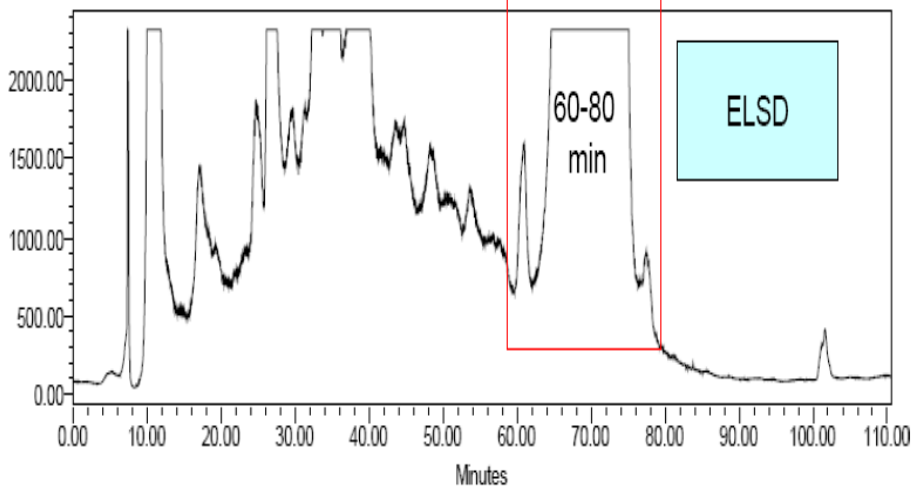

**Supplementary Figure 7 | HPLC chromatogram for signal (DCM-MeOH); (25:75), on HPLC-C18 (21.2 x 250 mm)**

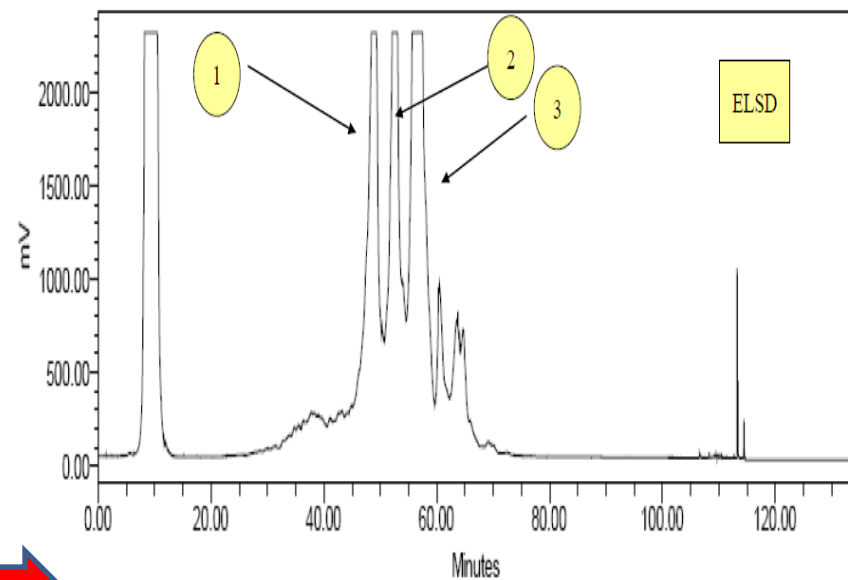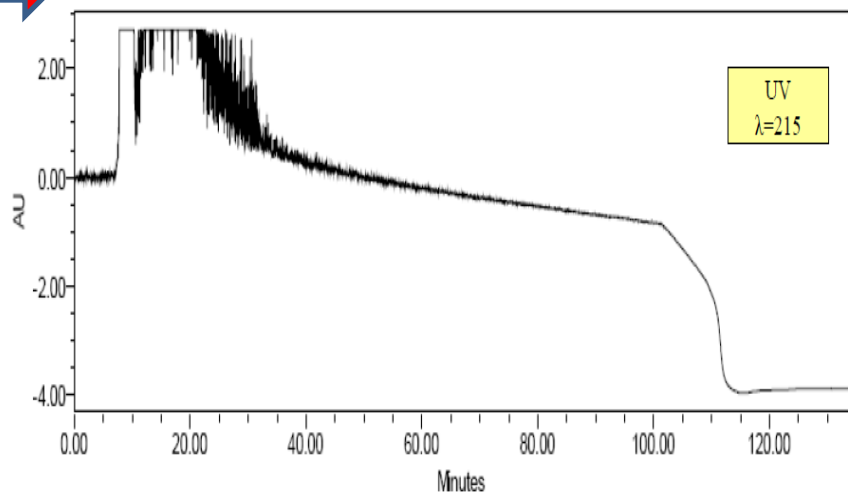

**Supplementary Figure 8 | HPLC chromatogram of HPLC-C18 (21.2 x 250 mm), (signal 60-80 min) on HPLC-NH<sub>2</sub> (21.2 x 250 mm), signals 1-3 indicated the presence of the rhododendrosaponins I-III in similar order**

Generic Display Report (all)

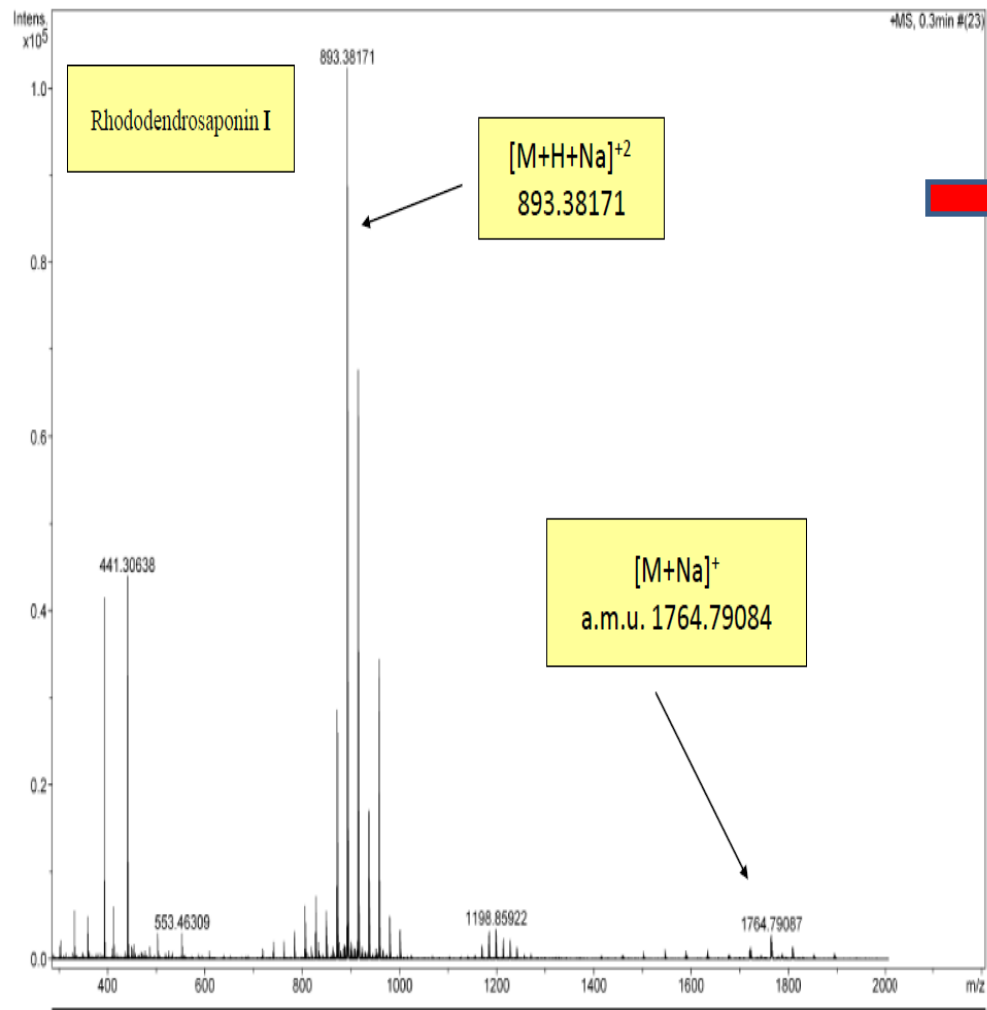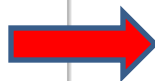

Generic Display Report (all)

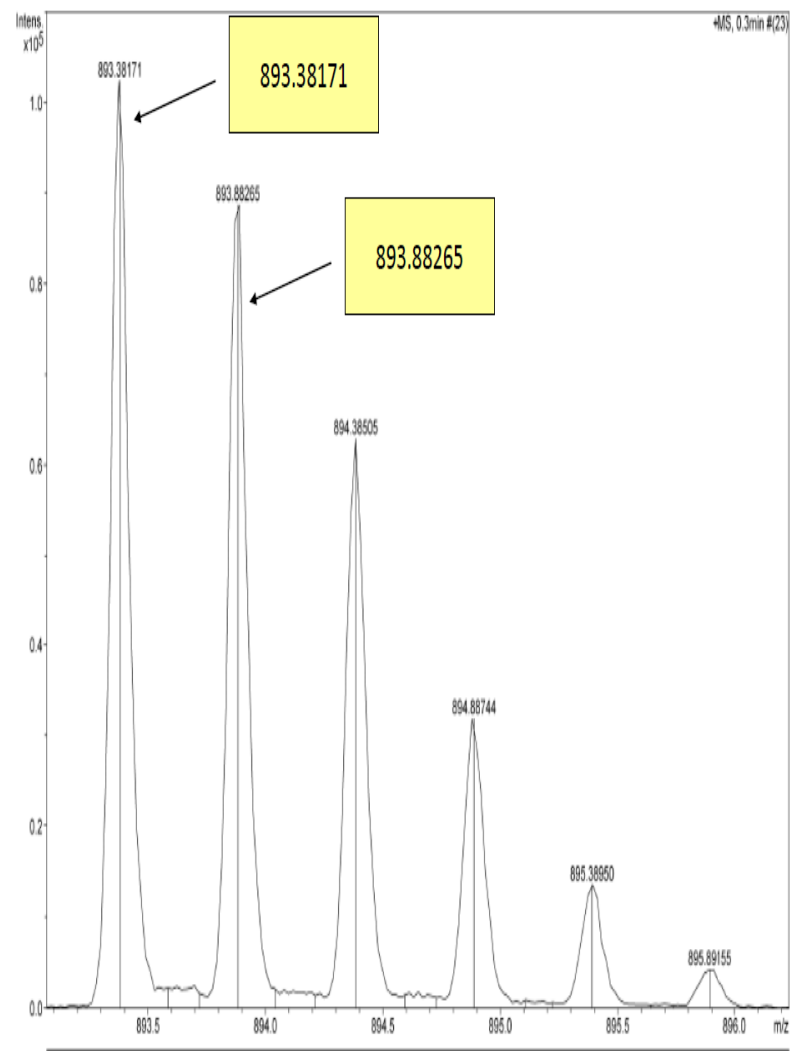

- Supplementary Figure 9 | MS chromatogram of rhododendrosaponin I

## Identification

- The complete 1D and 2D NMR data sets of rhododendrosaponins **I-III** were gathered. Evaluation of  $^1\text{H}$  and  $^{13}\text{C}$  NMR data of the rhododendrosaponins **I-III**, permitted the validation of the basic skeletons of the oleanane-type triterpenes [polygalacic acid; (2 $\beta$ ,3 $\beta$ ,4 $\alpha$ ,16 $\alpha$ )-2,3,16,23-tetrahydroolean-12-en-28-oic acid] with one characteristic double bond, where H-12 (5.34 Hz) shows an HMBC correlation to C-14 (40.9 Hz); H-23 shows HMBC correlations to C-3 (84.0 Hz), C-4 (43.1 Hz), C-5 (48.3 Hz) and C-24 (65.6 Hz);. H-25 (1.22 Hz) shows HMBC correlations to C-1 (44.4 Hz), C-5 (48.3 Hz), C-9 (48.2 Hz) and C-10 (37.6 Hz); H-26 (0.72 Hz) shows HMBC correlations to C-7 (33.8 Hz), C-8 (42.9 Hz), C-9 (48.2 Hz) and C-14 (40.9 Hz); H-27 (1.31 Hz) shows HMBC correlations to C-8 (42.9 Hz), C-13 (144.8 Hz), C-14 (40.9 Hz) and C-15 (36.4 Hz); H-30 (0.81 Hz) shows HMBC correlations to C-19 (48.2 Hz), C-21 (35.5 Hz) and C-29 (25.0 Hz).

- In addition mild hydrolysis using dioxane containing HCl followed by GC/MS analysis, showed the presence of 3-hydroxybutanoate, This was confirmed by HMBC correlations of the 3-hydroxybutanoate dimer, where H-2' (2.83 Hz) shows HMBC correlations to C-1' (171.5 Hz), C-3' (68.8 Hz), and C-4' (20.8 Hz), while H-2'' (2.52 Hz) shows HMBC correlations to C-1'' (172.6 Hz), C-3'' (65.6 Hz), and C-4'' (23.6 Hz).

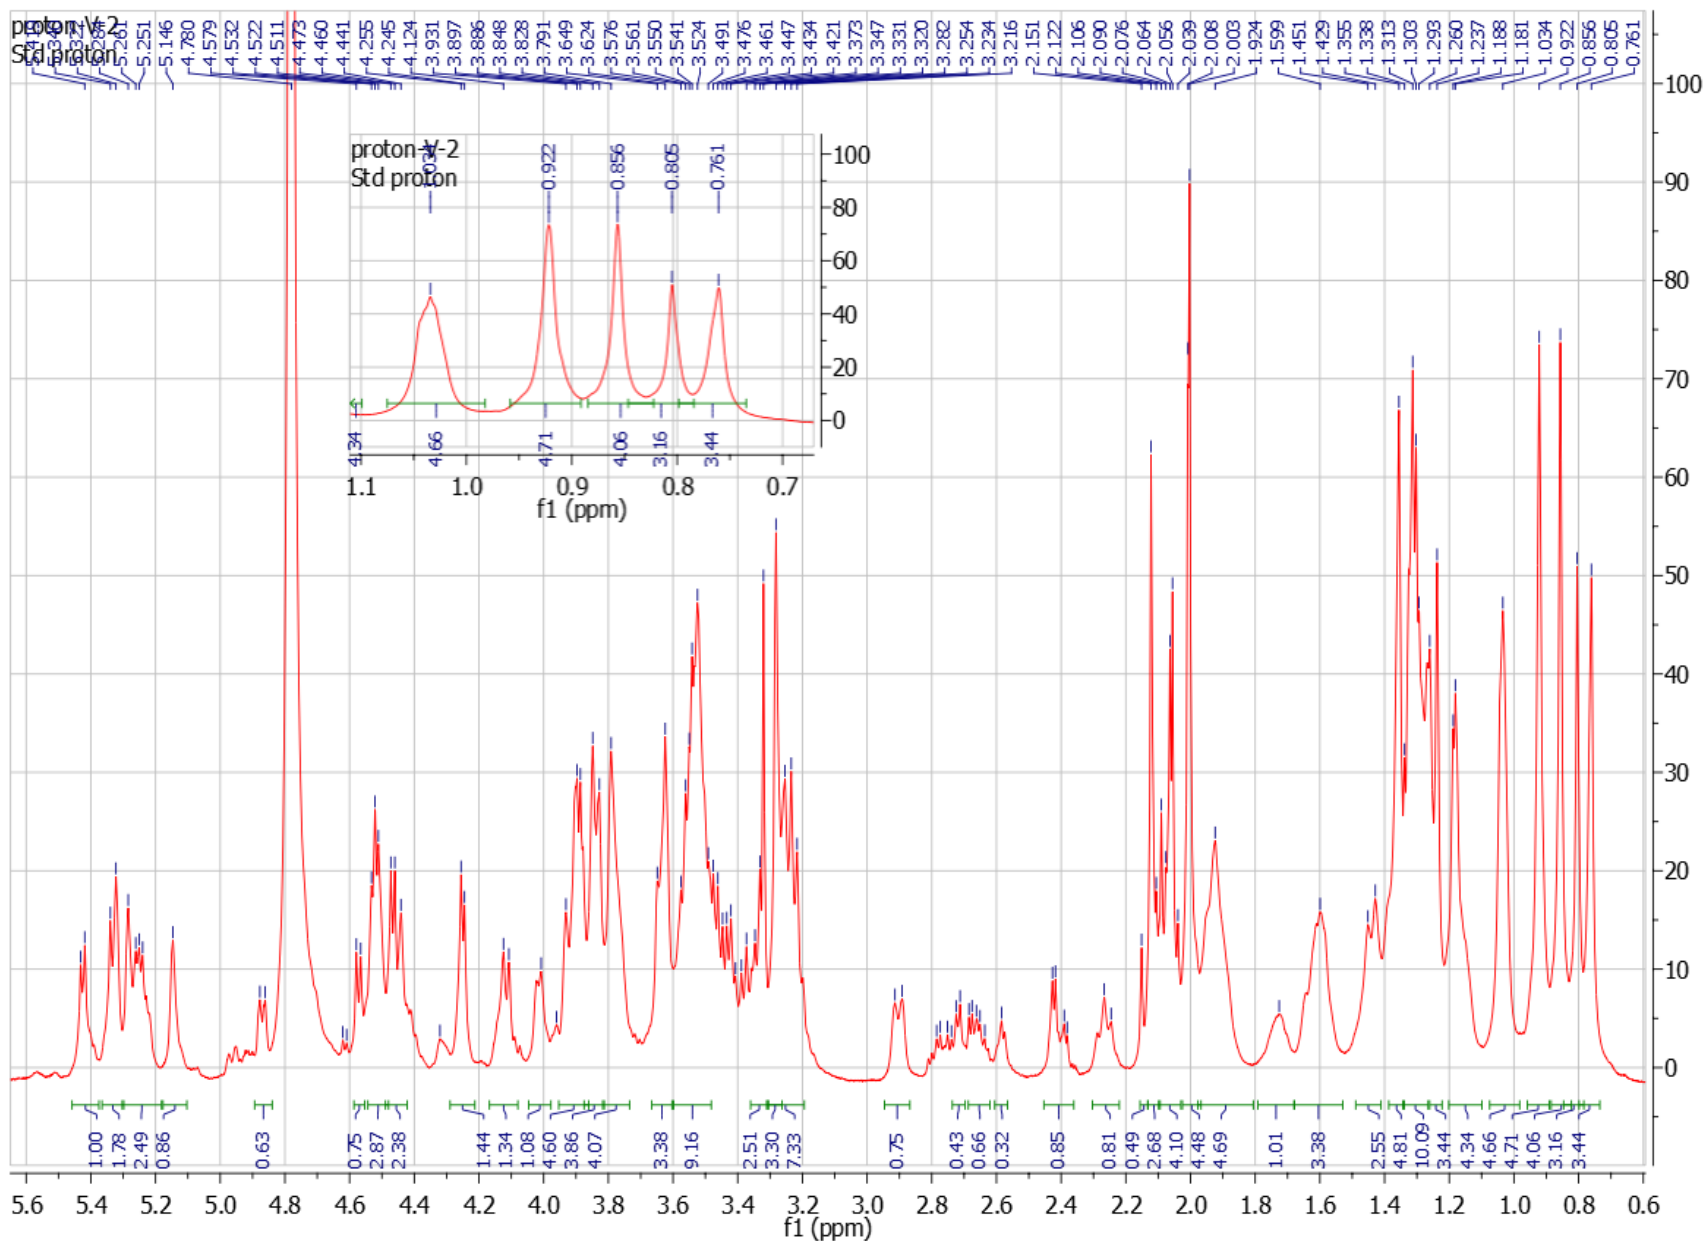

- Supplementary Figure 10 | <sup>1</sup>H NMR of rhododendrosaponin I



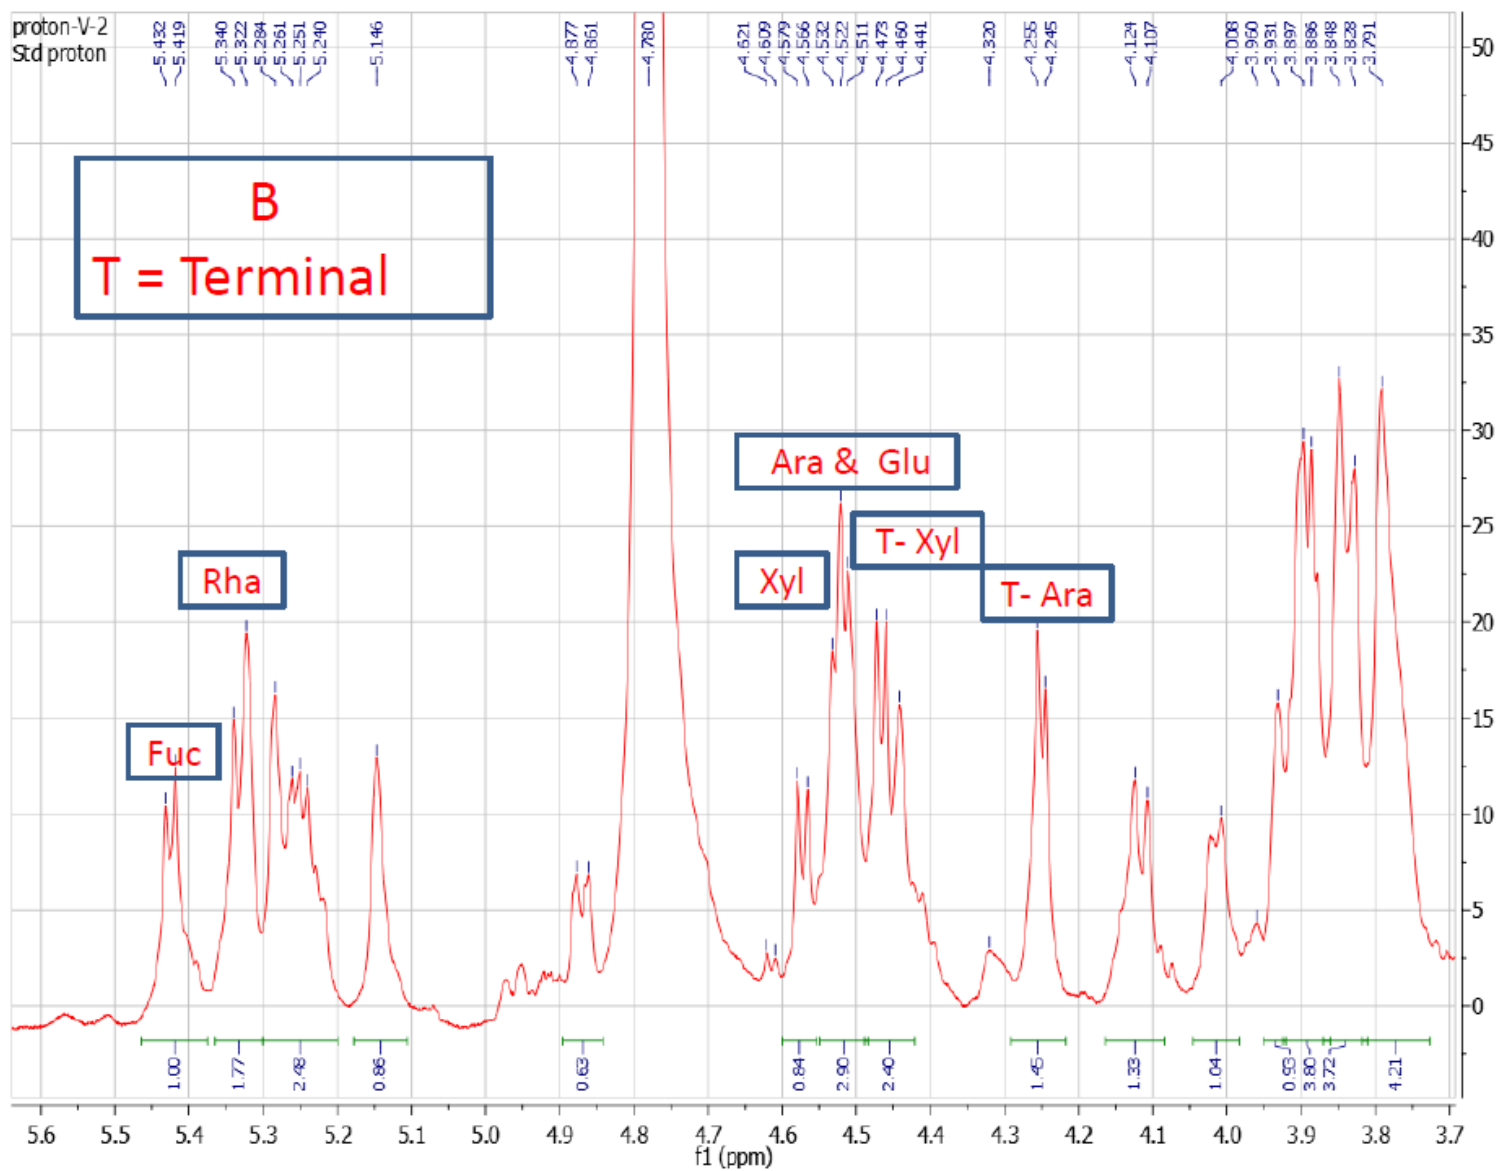

- Supplementary Figure 11 |  $^1\text{H}$  NMR expansion of rhododendrosaponin I

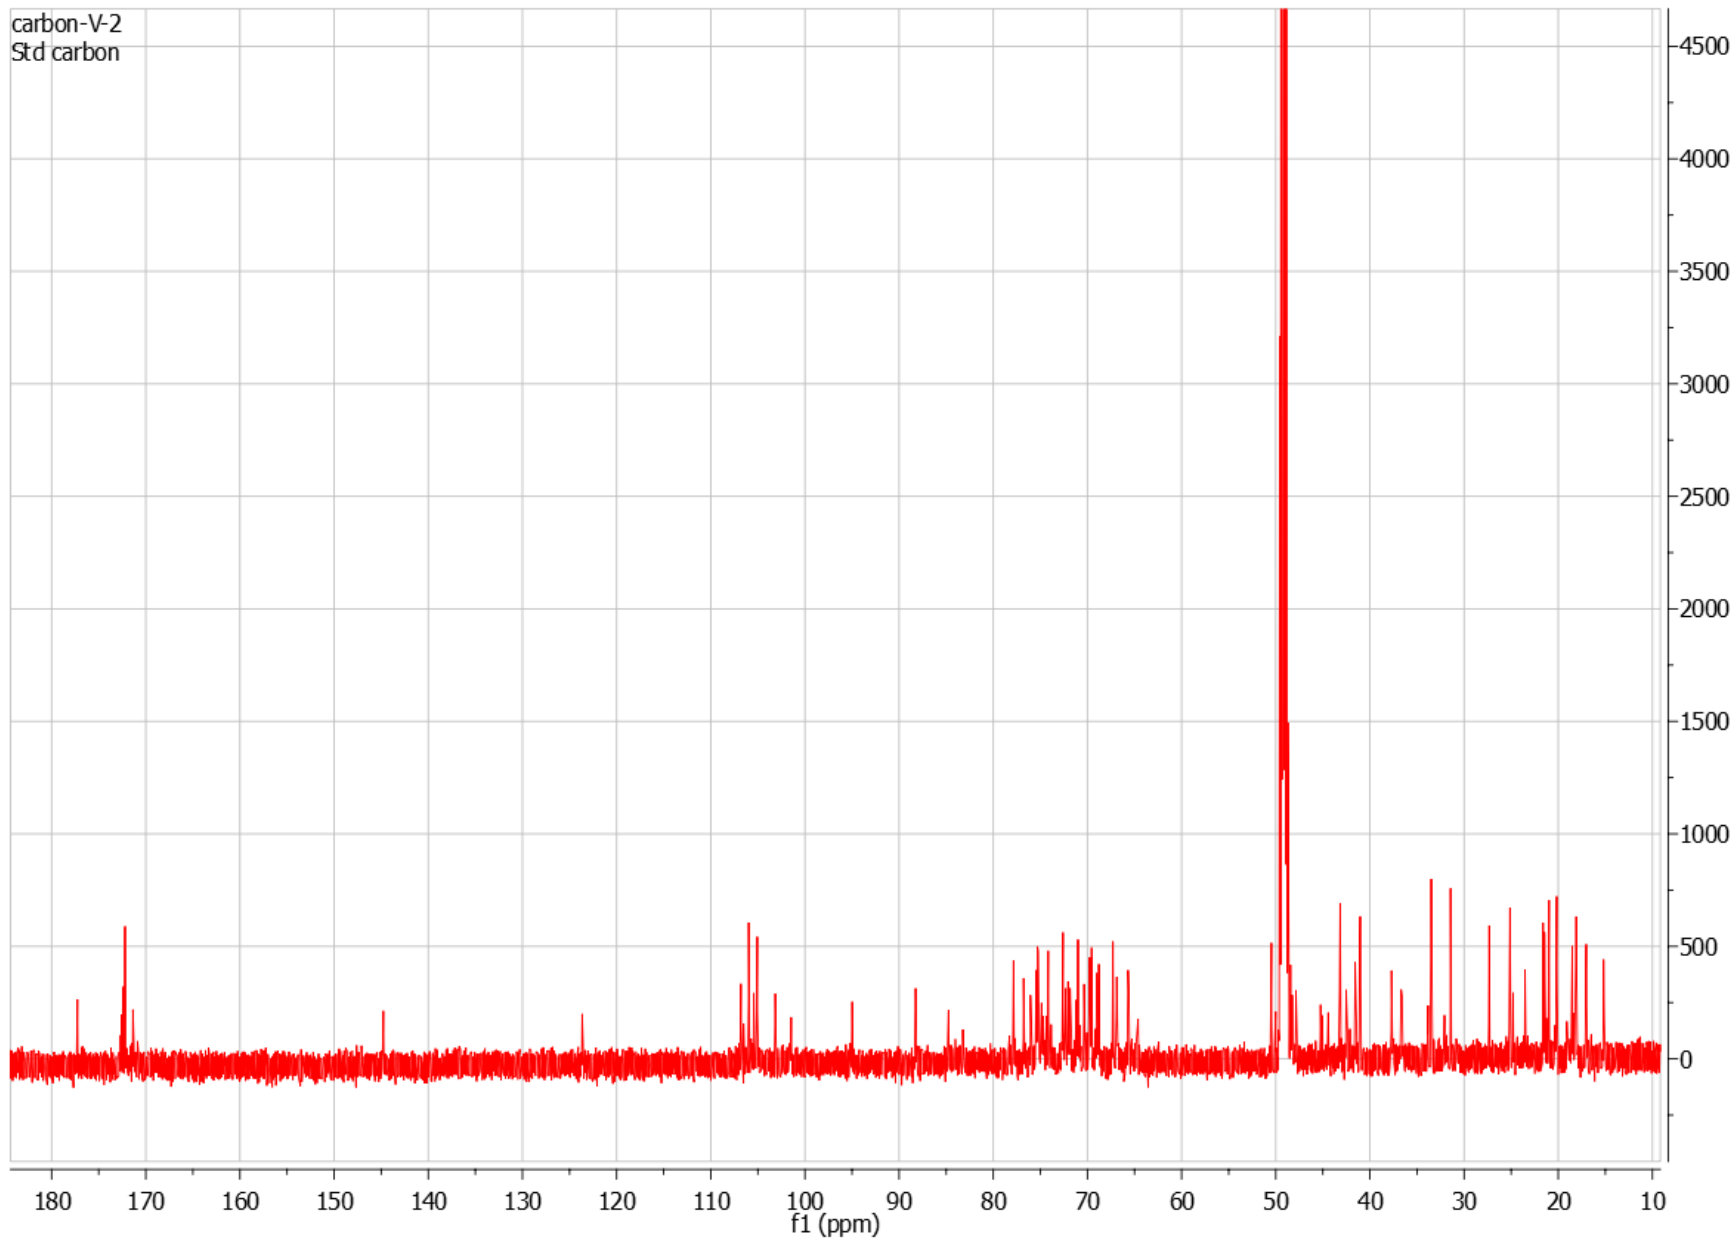

- Supplementary Figure 12 |  $^{13}\text{C}$  NMR of rhododendrosaponin I

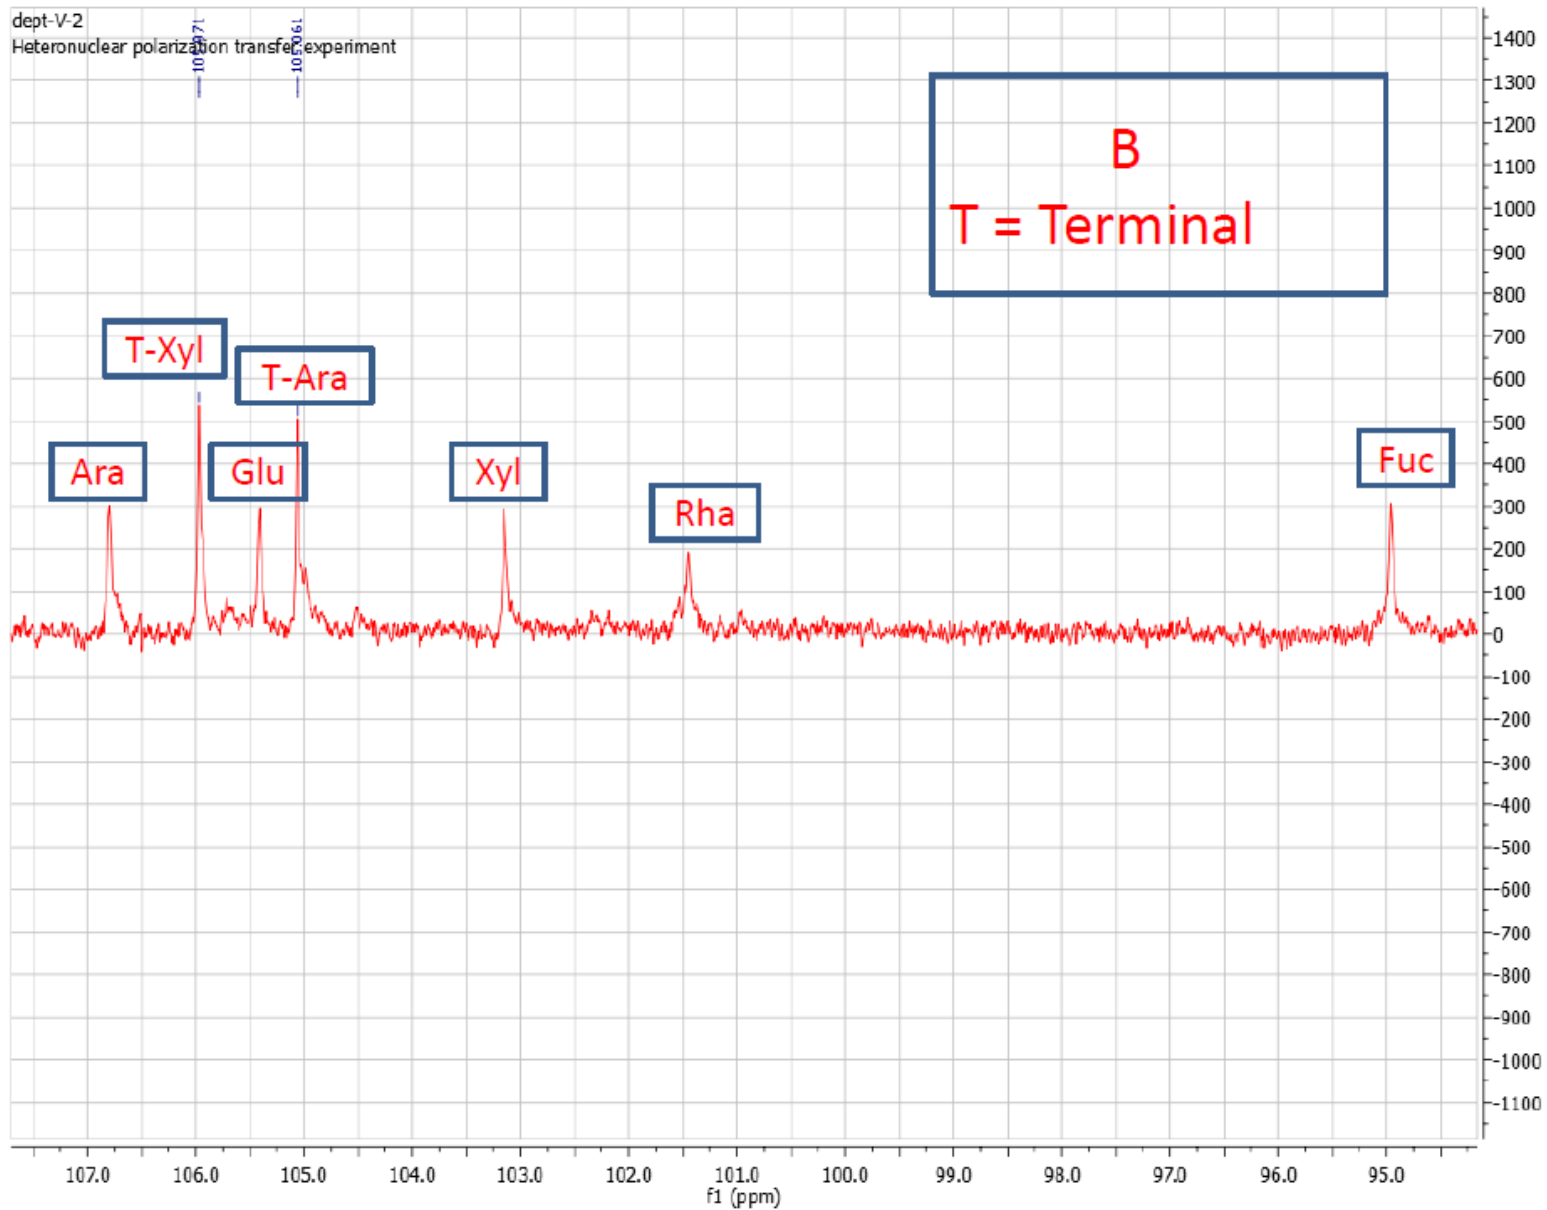

- Supplementary Figure 13 |  $135^\circ$  DEPT of rhododendrosaponin I (the downfield region)

**B**  
**T = Terminal**

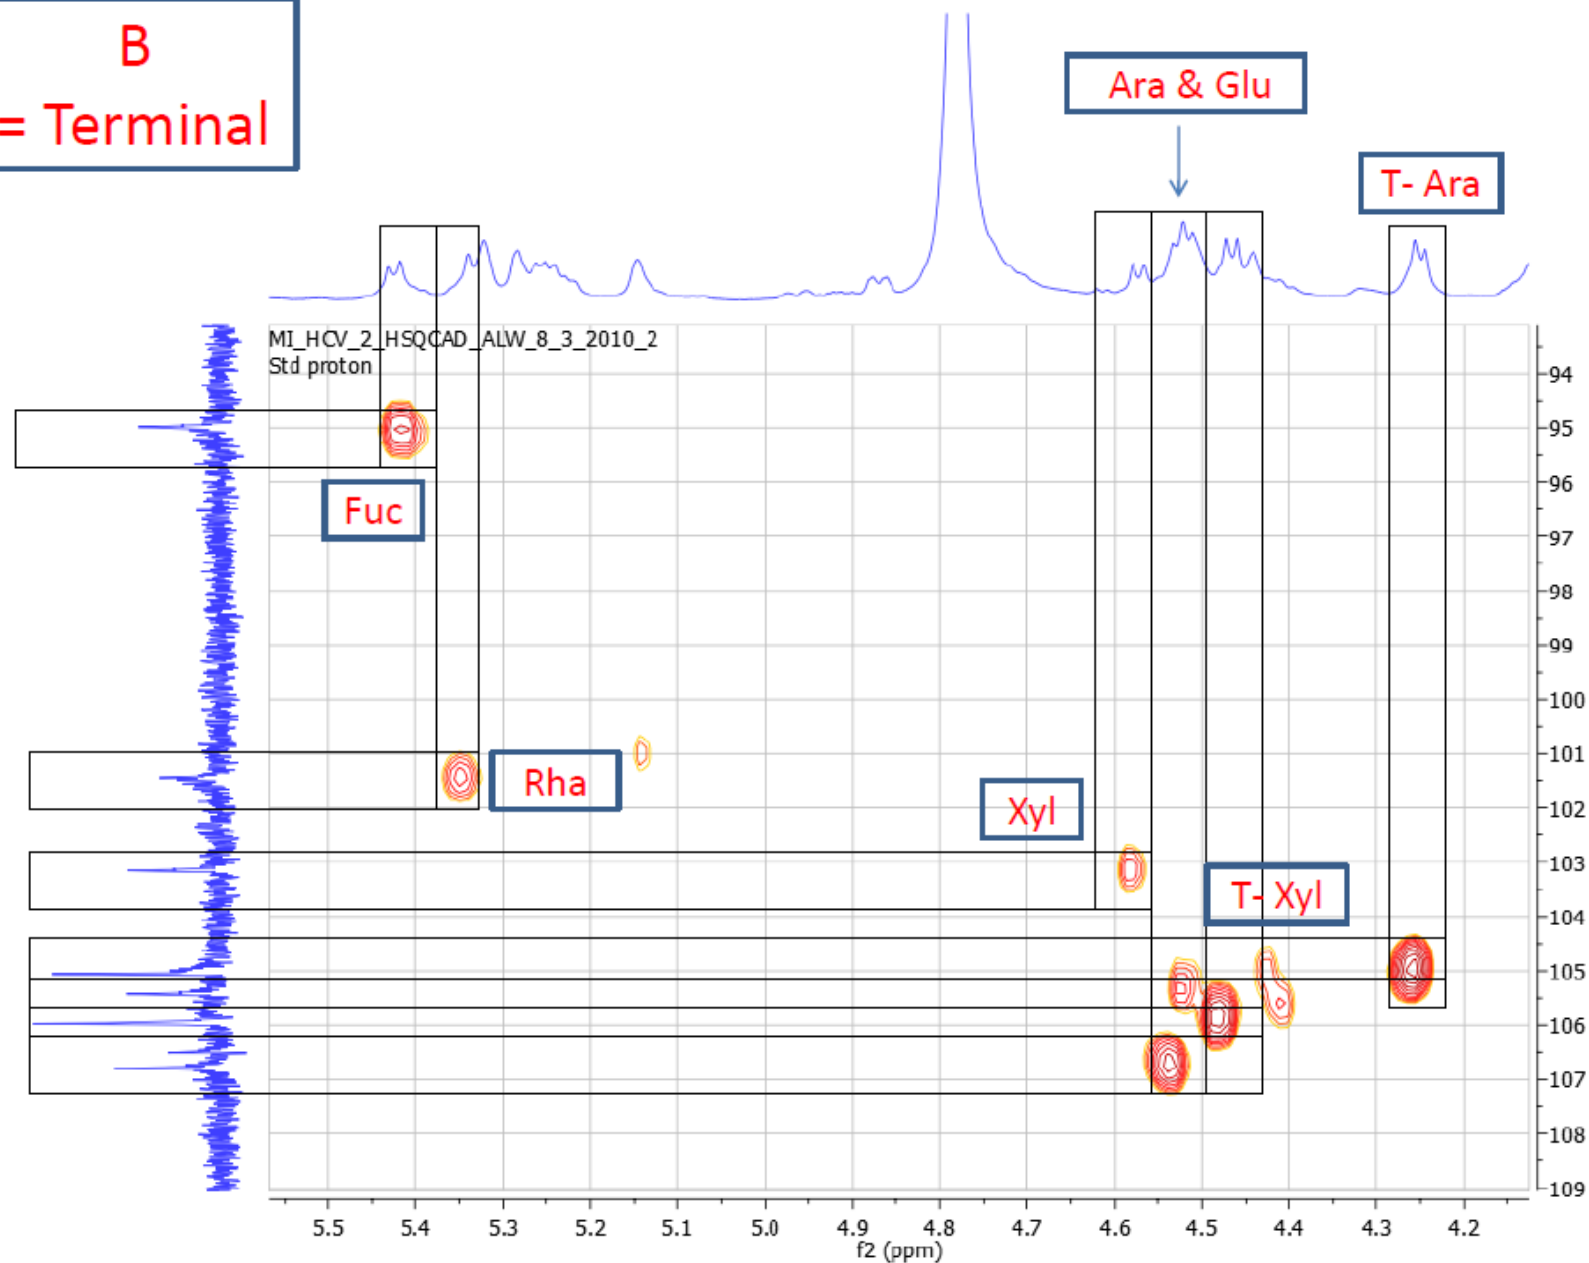

- Supplementary Figure 14 |HSQC spectrum of rhododendrosaponin I in methanol- $d_4$  (600 MHz); (the downfield region)

Generic Display Report (all)

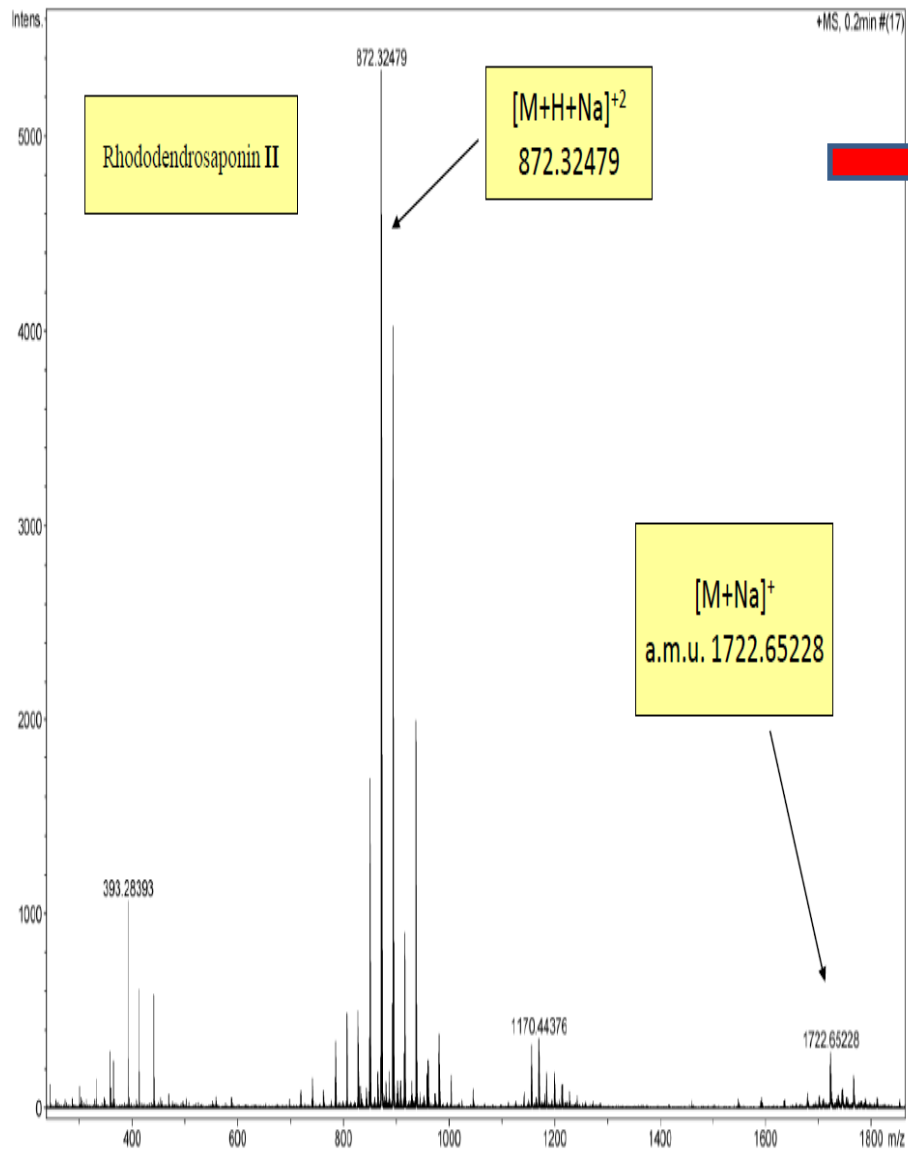

Generic Display Report (all)

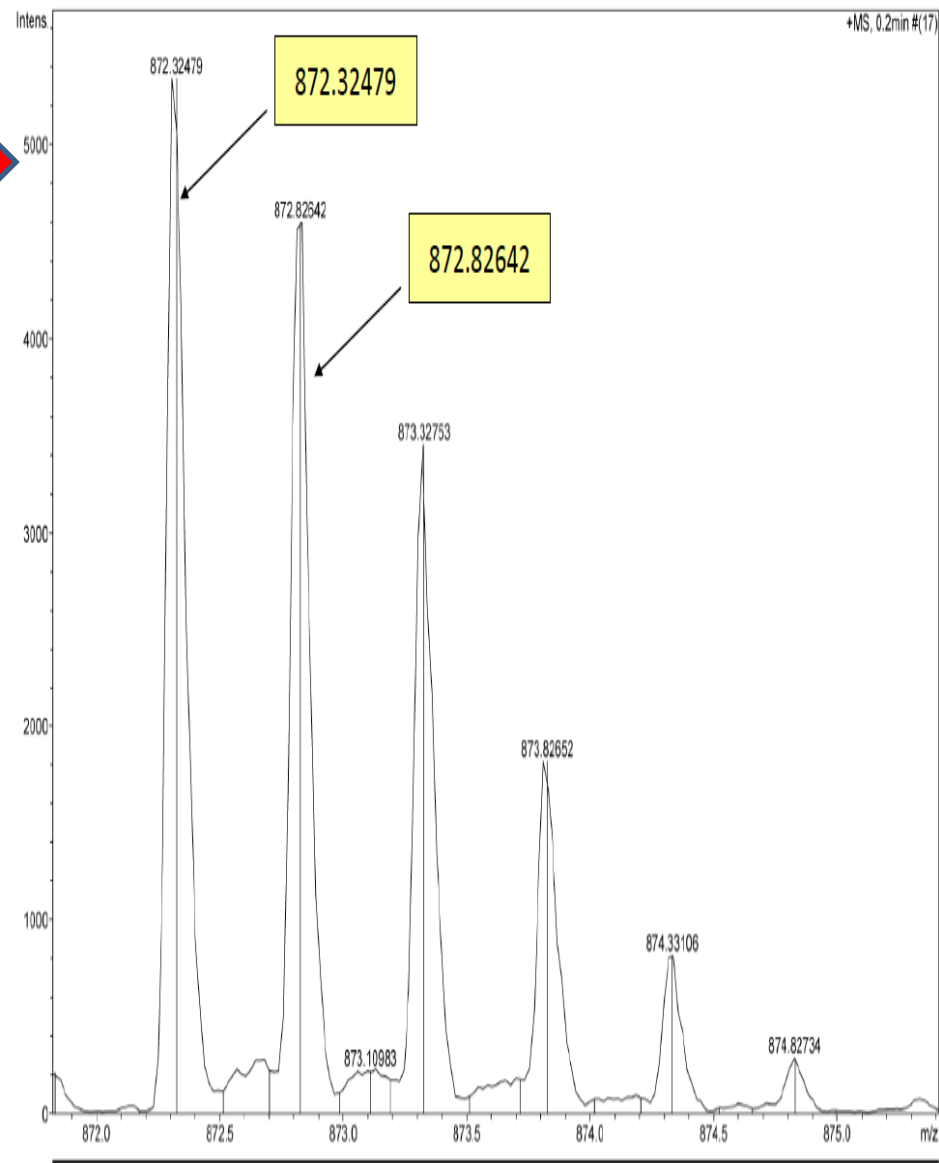

- Supplementary Figure 15 |MS chromatogram of rhododendrosaponin II.

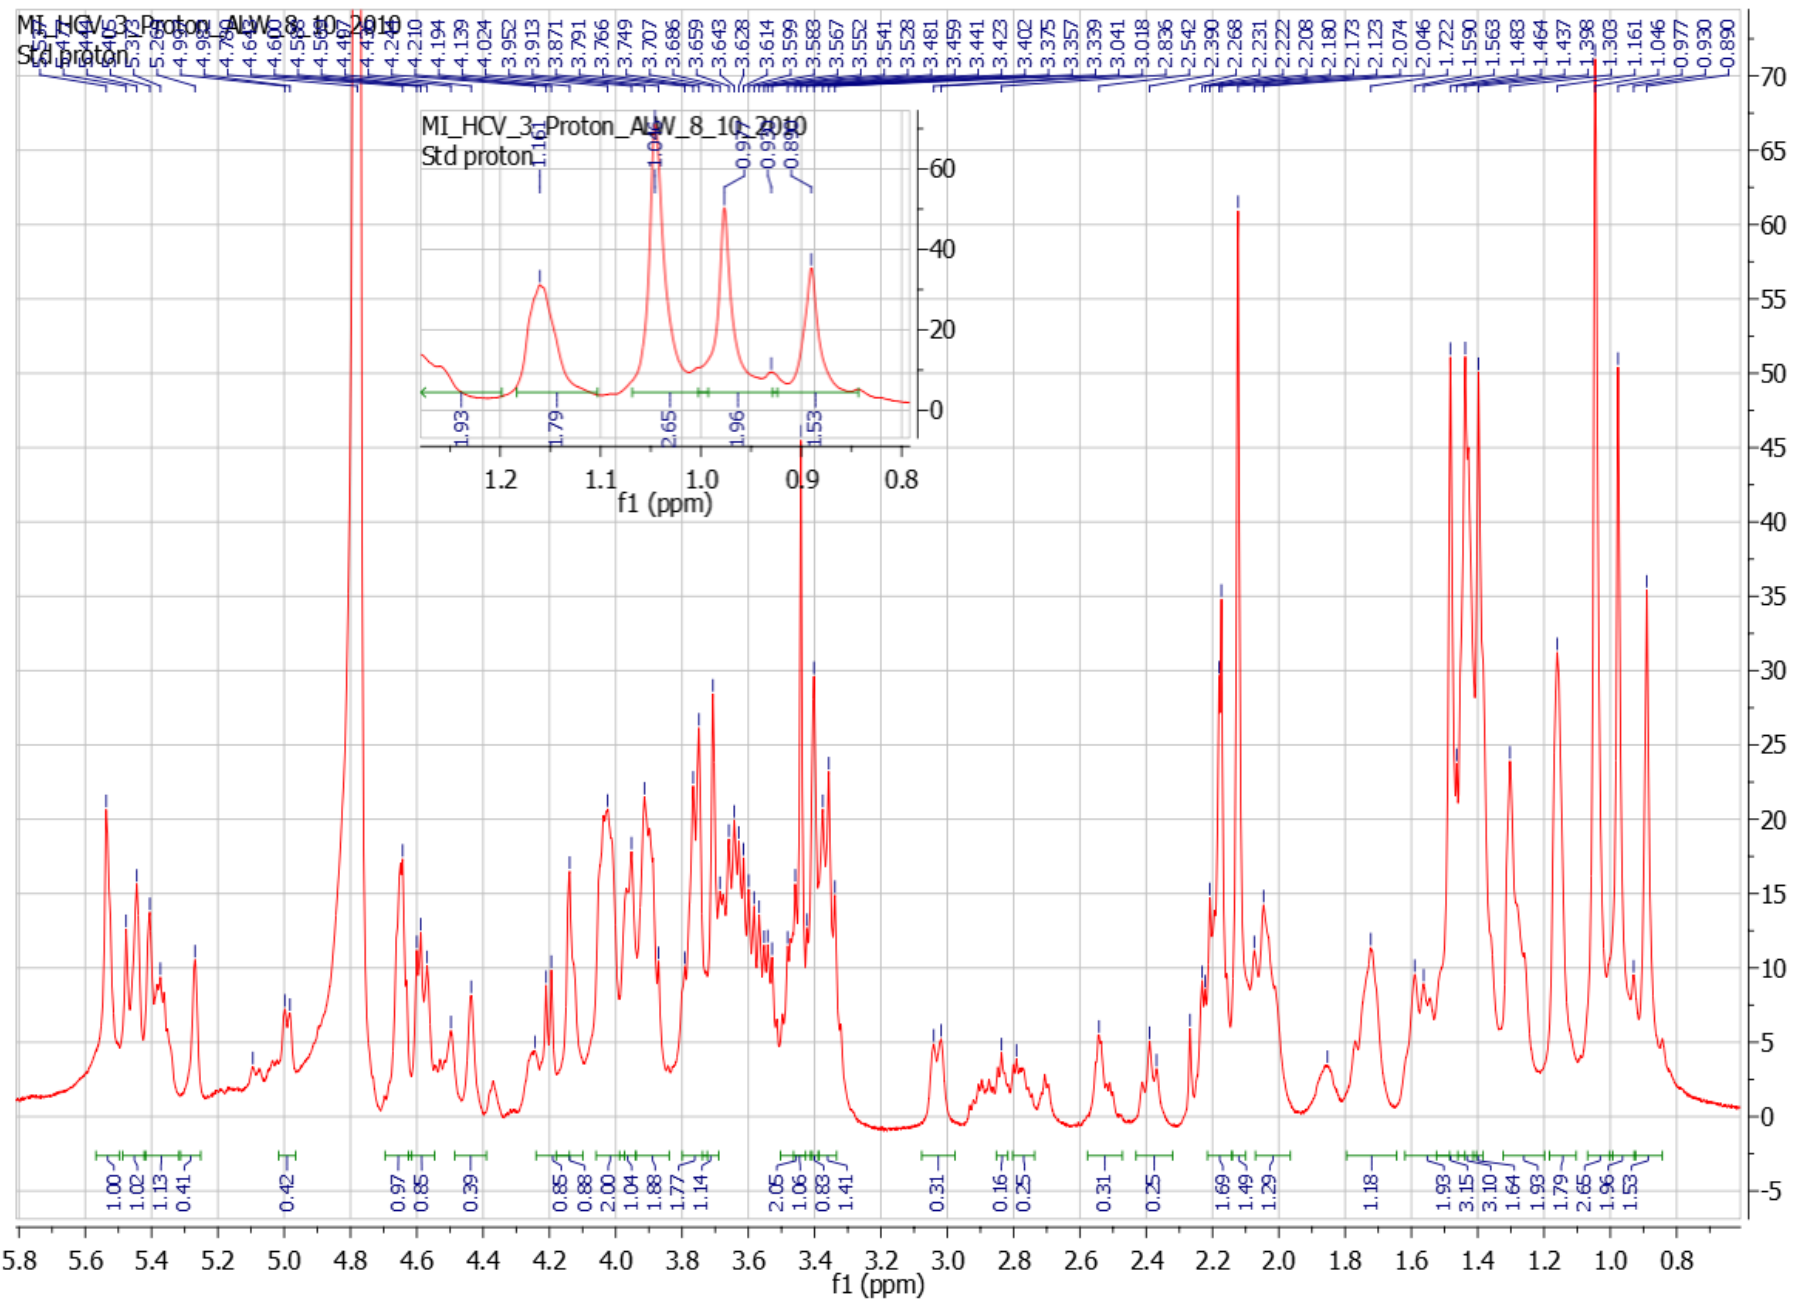

- Supplementary Figure 16  $^1\text{H}$  NMR of rhododendrosaponin II

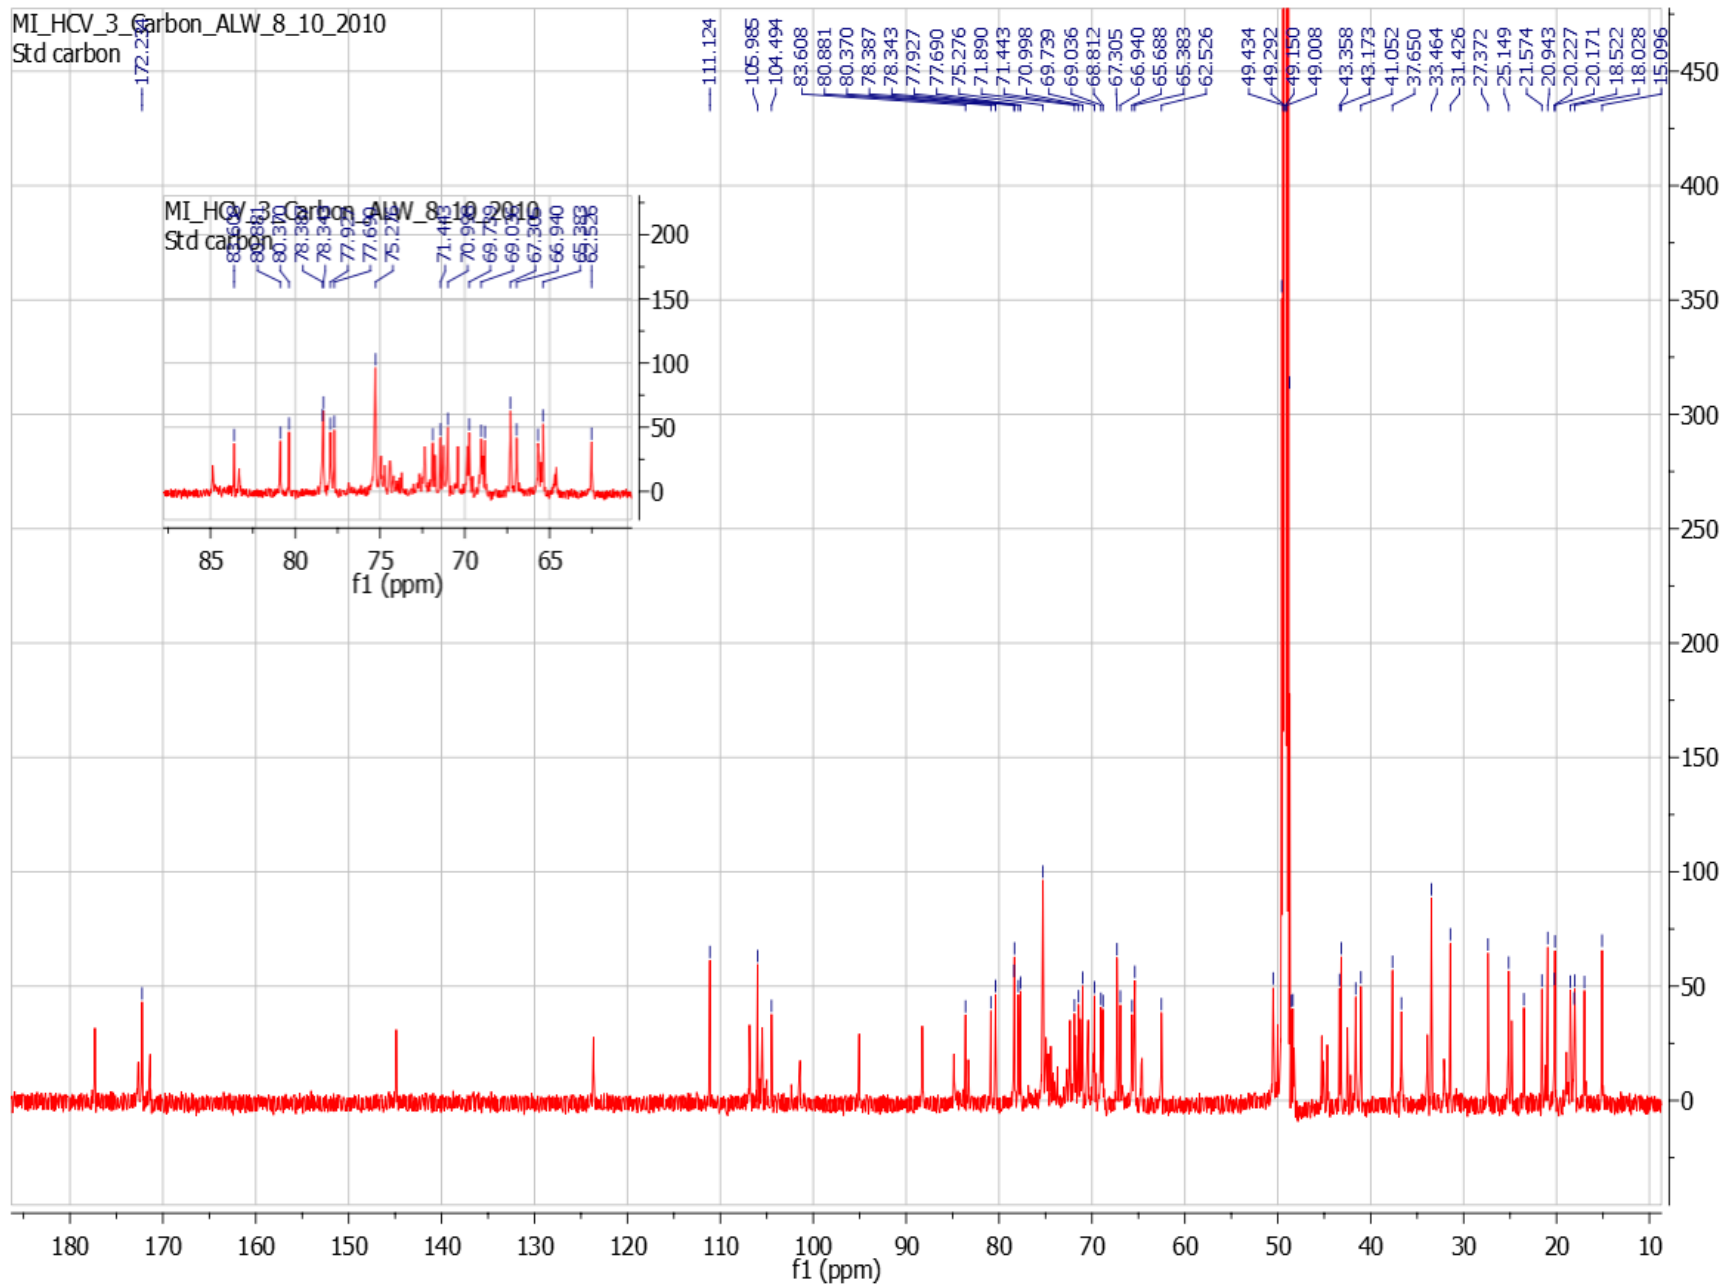

- Supplementary Figure 17 |  $^{13}\text{C}$  NMR of rhododendrosaponin II

# Generic Display Report (all)

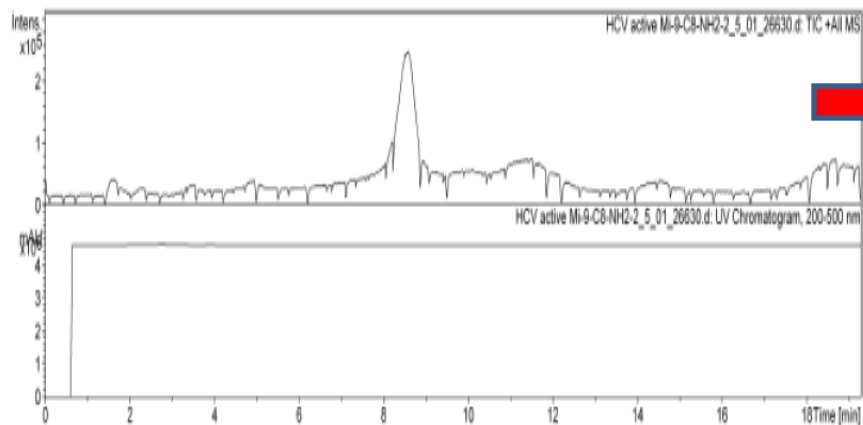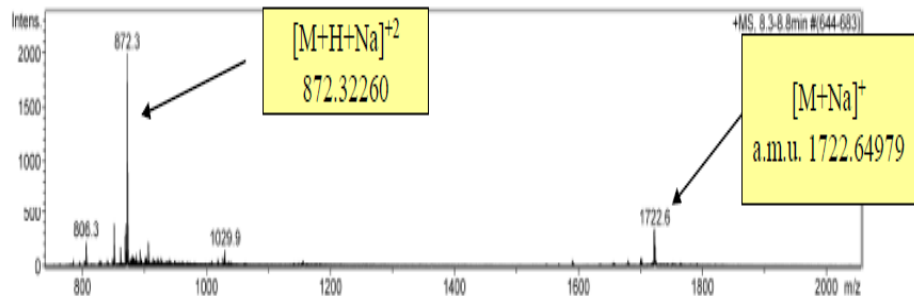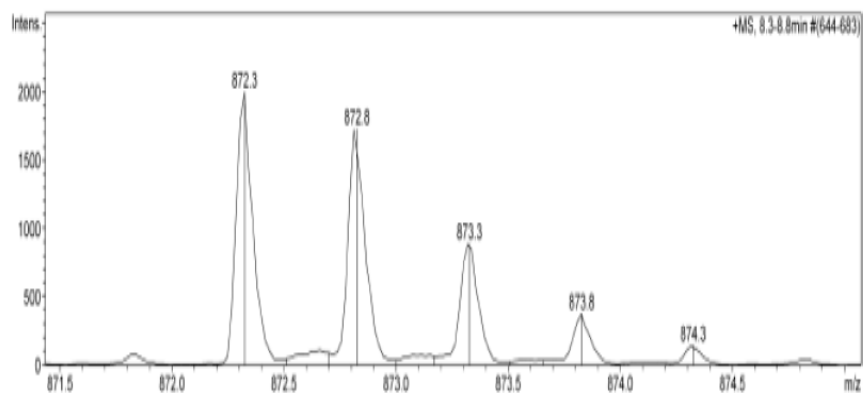

# Generic Display Report (all)

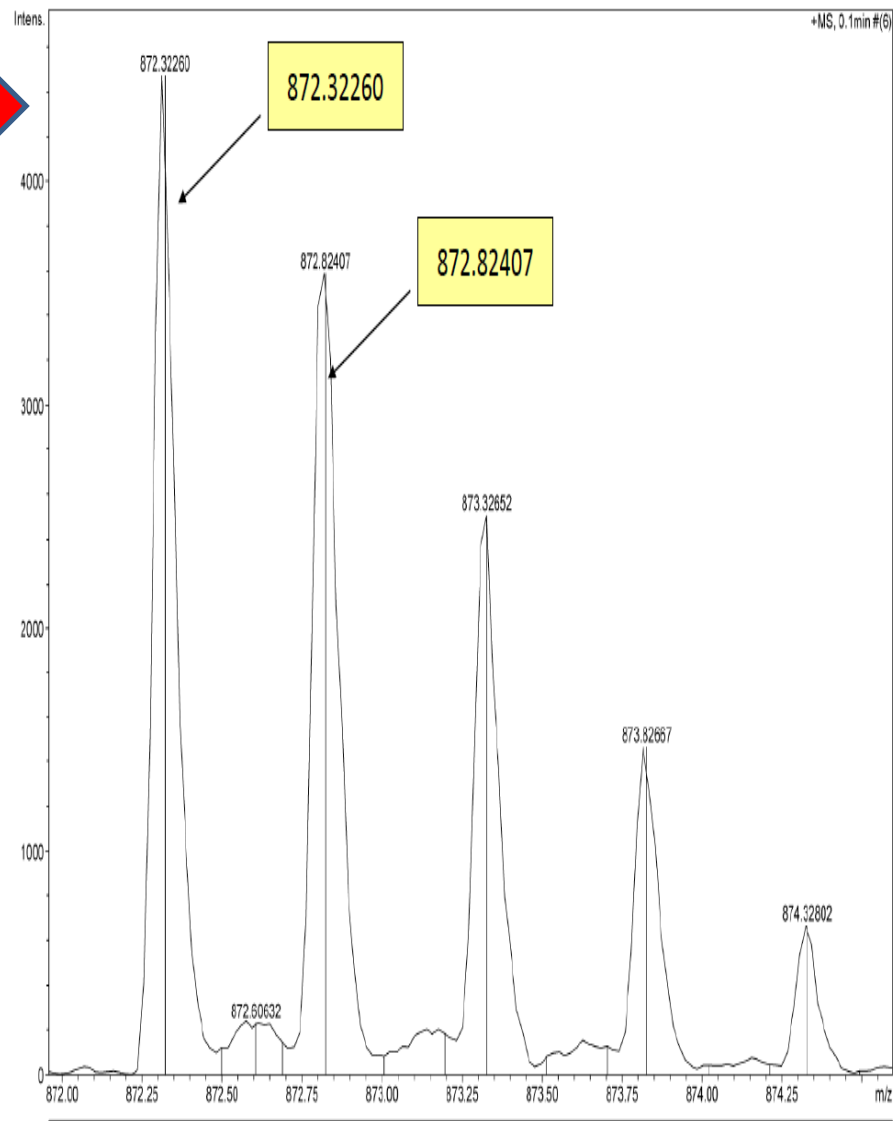

- Supplementary Figure 18 | MS chromatogram of rhododendrosaponin III



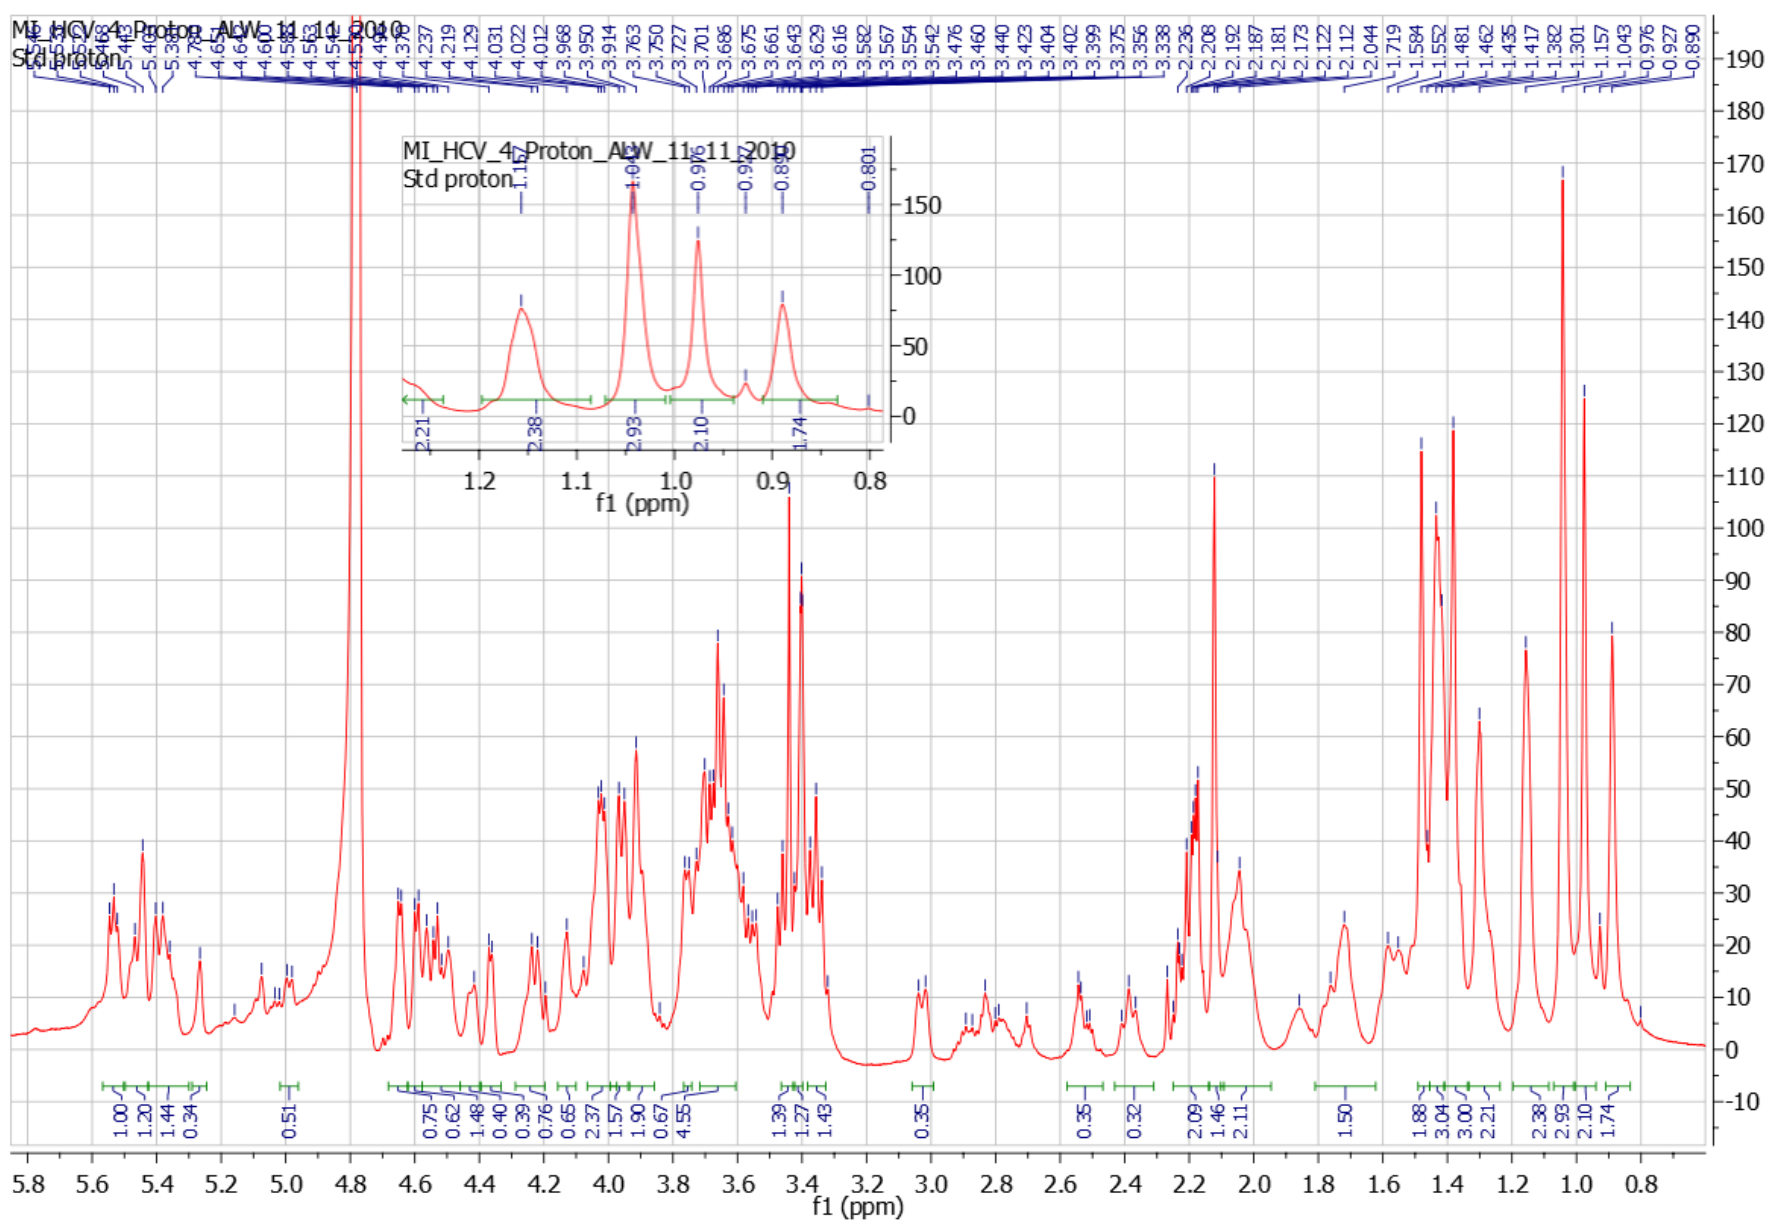

- Supplementary Figure 19 | <sup>1</sup>H NMR of rhododendrosaponin III

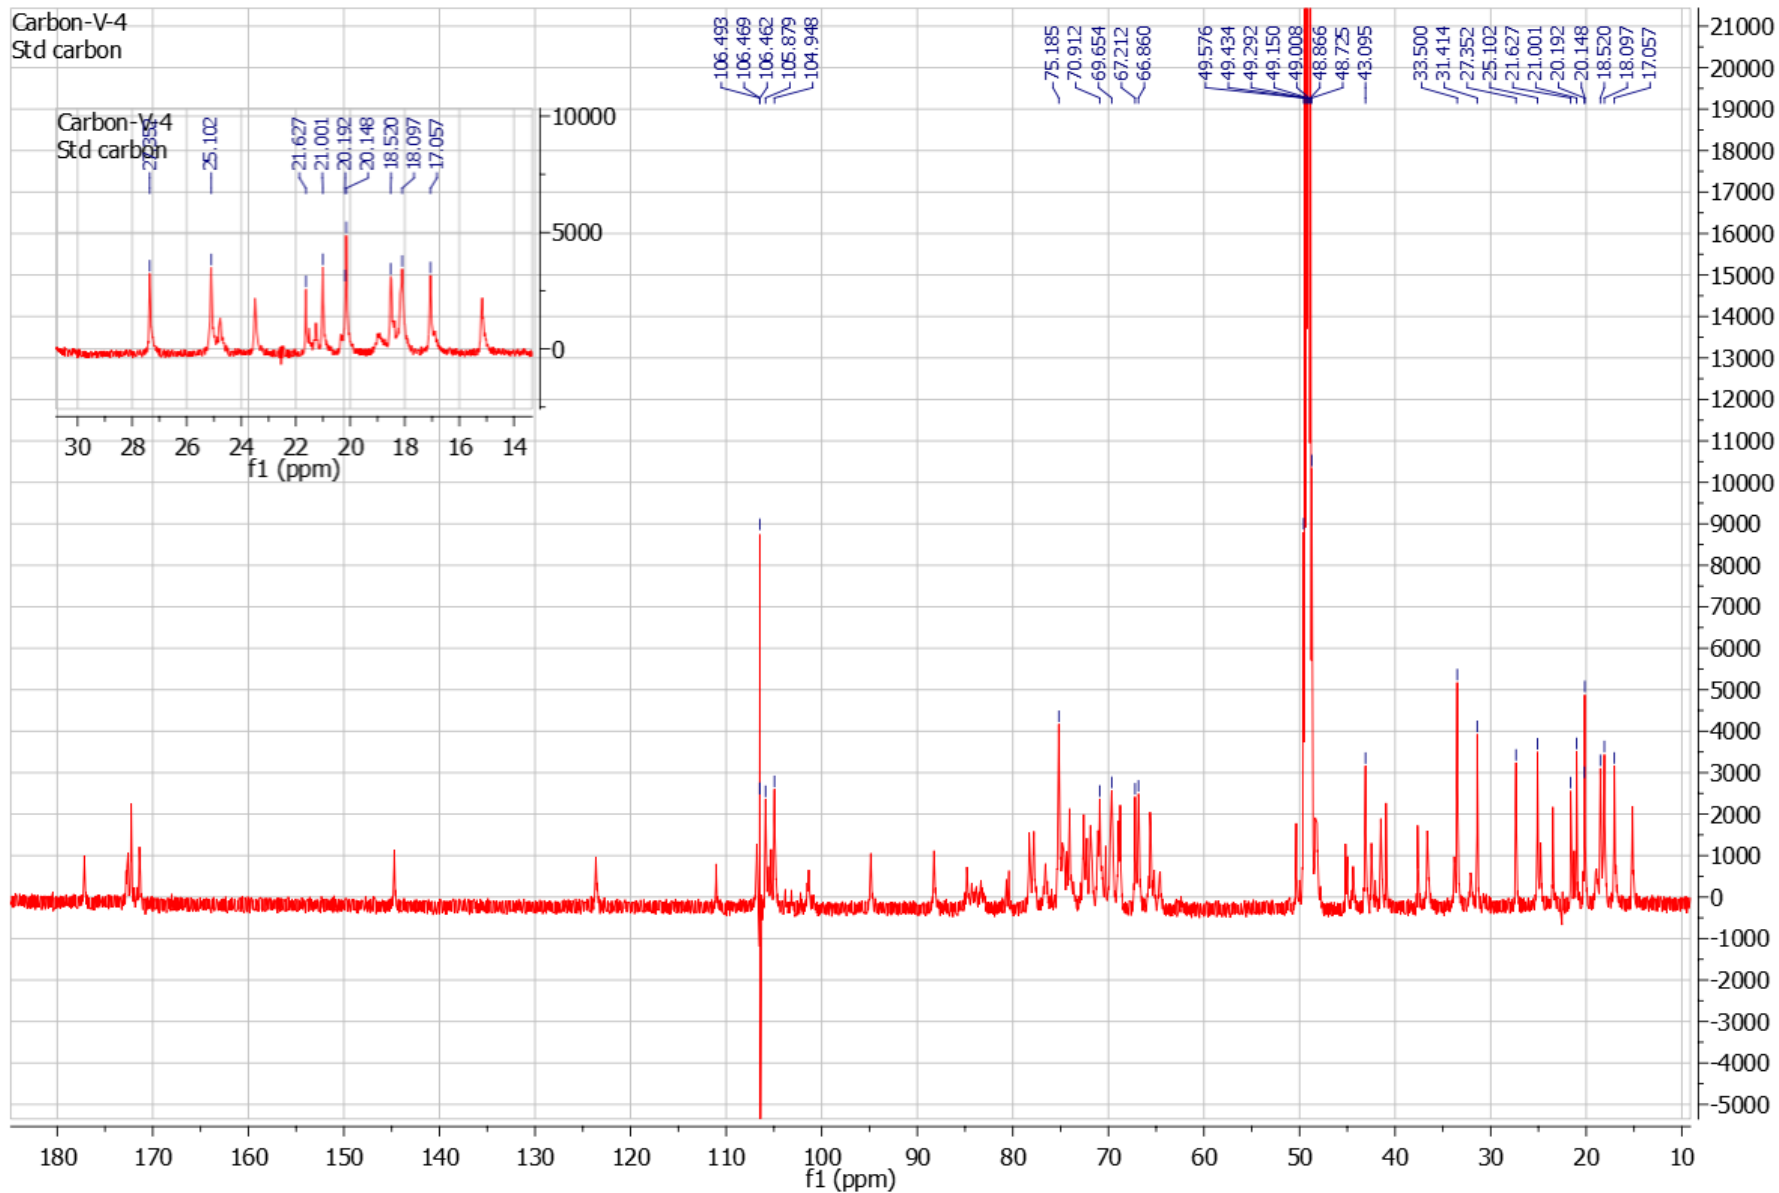

- Supplementary Figure 20 |  $^{13}\text{C}$  NMR of rhododendrosaponin III

**B**

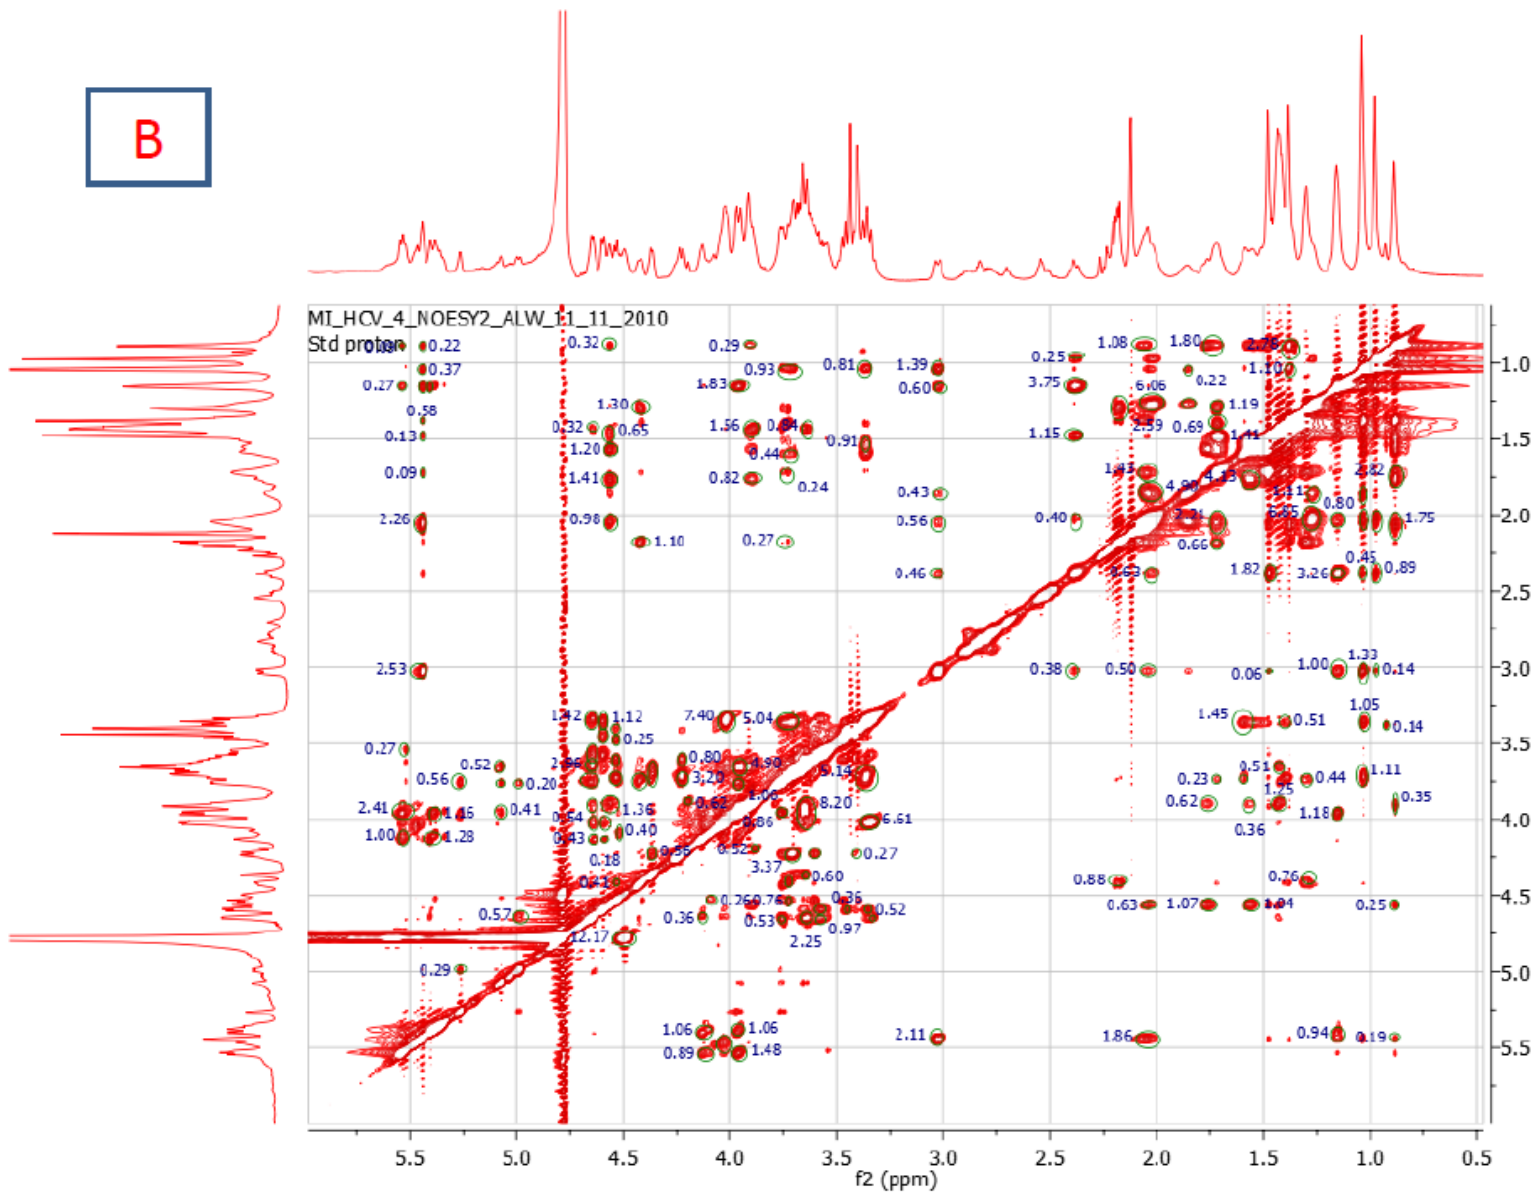

- Supplementary Figure 21 | NOESY spectrum of rhododendrosaponin III in methanol- $d_4$  (600 MHz)

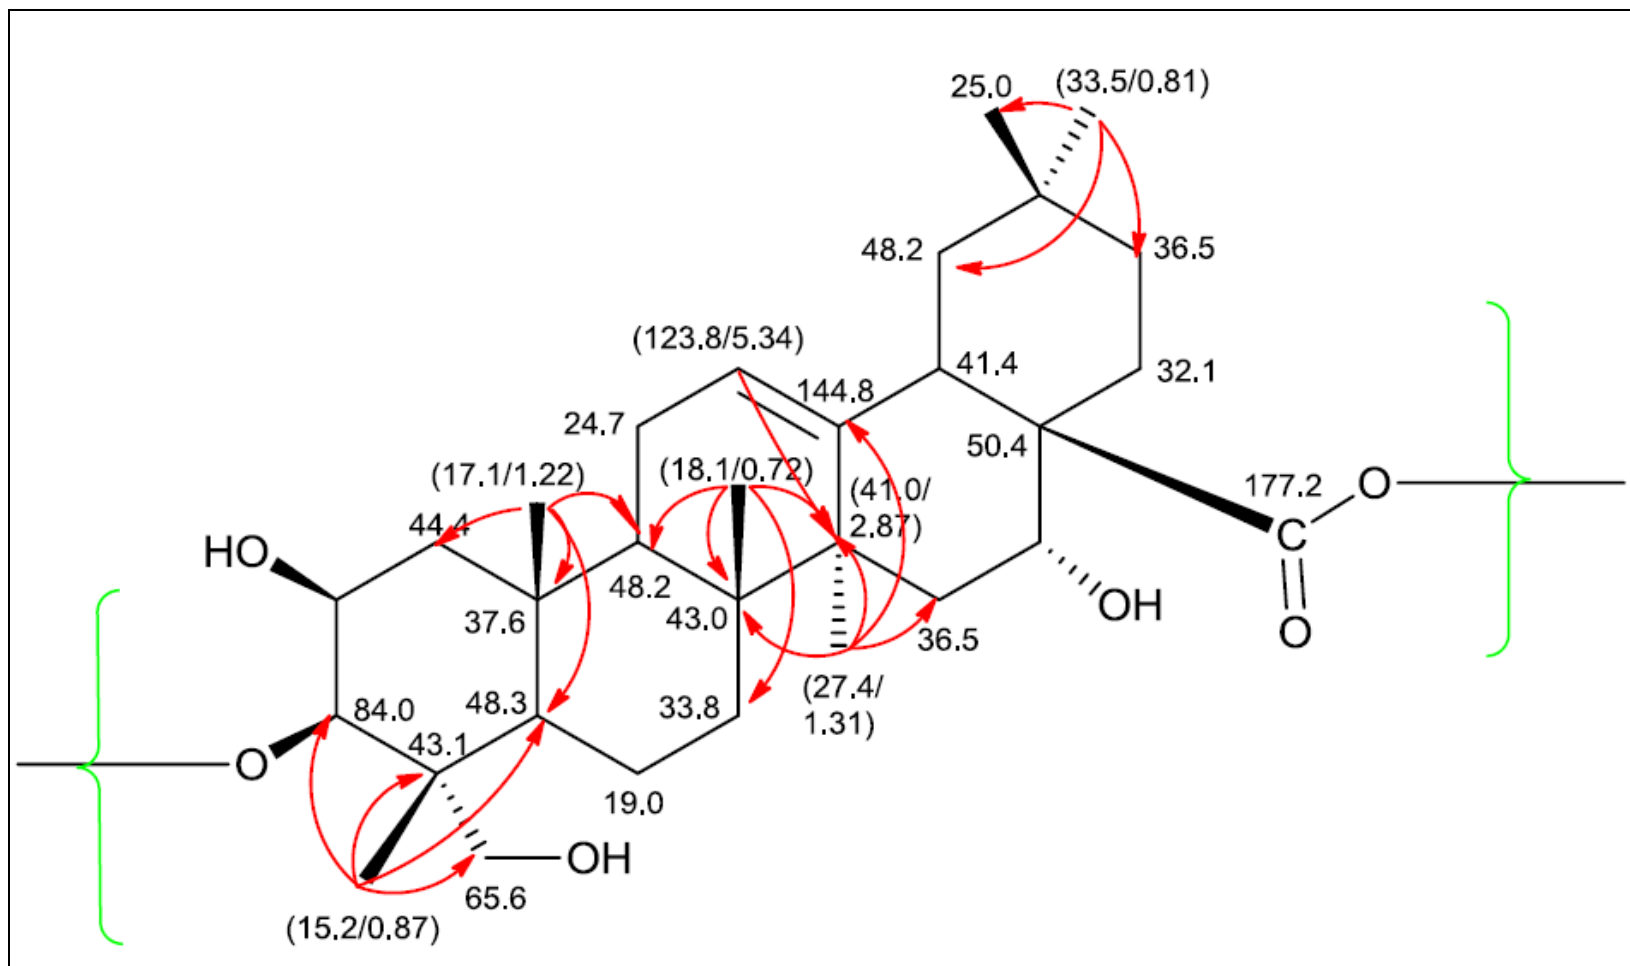

- Supplementary Figure 22 | Selected HMBC correlations of the aglycone triterpene

## Search NIST Libraries for Spectrum Hit List

Search NIST Libraries for Spectrum Results

Hits Found: 5

Search NIST Libraries for Spectrum Parameters

Search Mode: Normal (Forward)

m/z Range: 39 - 651

Min Intensity: 30

Constraints: ---

Requested Pre-Search: 6000

Requested Final Search: 100

Search 3 Libraries: A. mainlib

B. replib

C. tutorial

Hydrolysis  
4 N HCl / Dioxane (1:1)  
(Reflux / 4 hrs)  
CHCl<sub>3</sub> extraction

## Target Spectrum

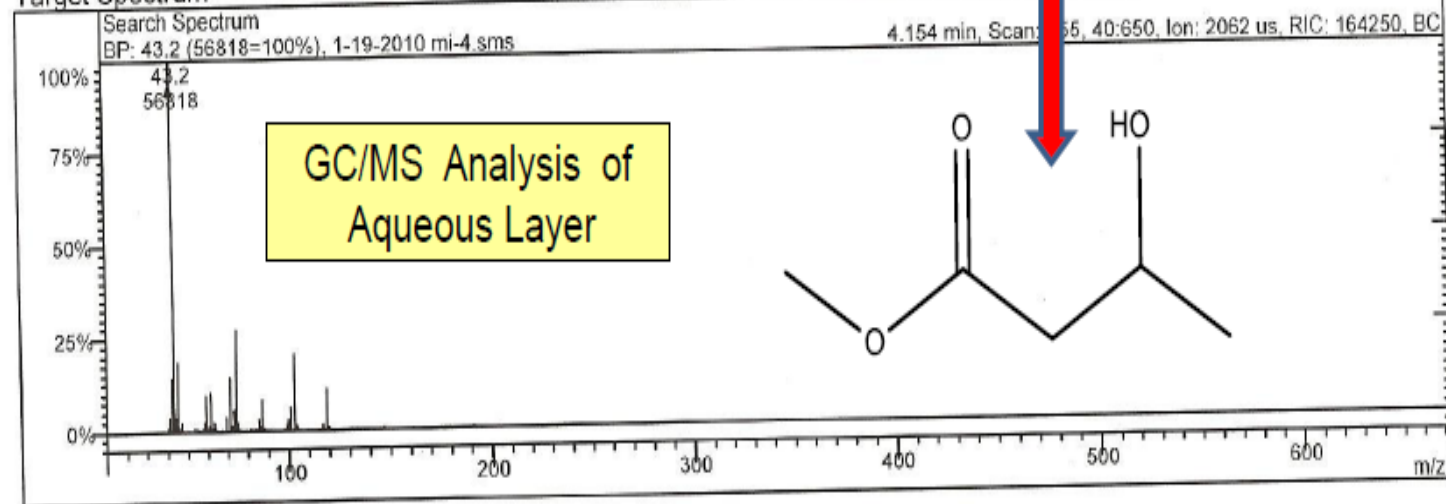

- Supplementary Figure 23 | GC/MS detection of 3-hydroxybutanoate in rhododendrosaponin III

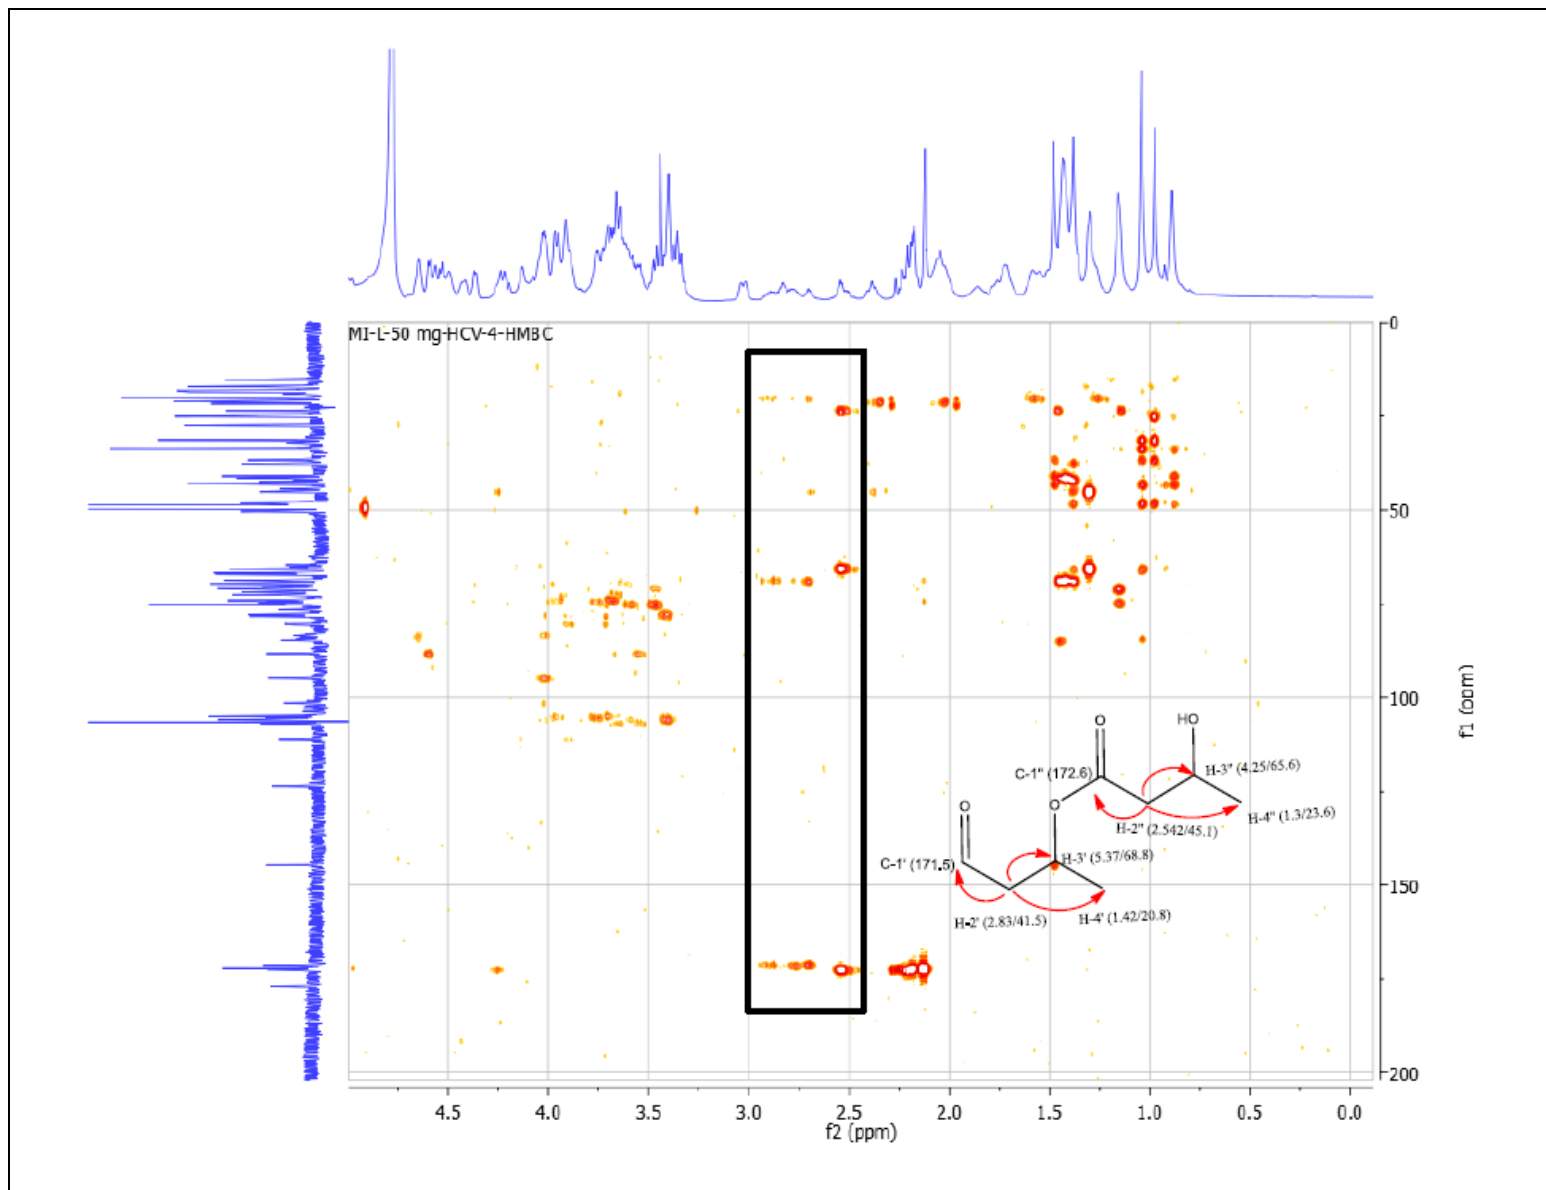

- **Supplementary Figure 24** | HMBC correlations of 3-hydroxybutanoate dimer in rhododendrosaponin **III**

# Identification and determination of the carbohydrate units

- Identification and determination of the carbohydrate units were established using  $^{13}\text{C}$  NMR and GC/MS/MS data while the determination of the sequence of oligosaccharides was completed through detailed MS studies including fragmentation by Nanospray Ionization-Linear Ion Trap Mass Spectrometry (NSI-MS<sup>n</sup>) through collaboration with the Complex Carbohydrate Research Center at The University of Georgia. The total carbohydrate content of the major glycoside rhododendrosaponin **III** was shown by GC analysis to be 73.8% by weight. The processed data revealed the presence of a glucosyl, two arbinosyl, a rhamnosyl, a fucosyl, and two xylosyl units (Table 1). Inositol was added to the sample before derivatization as an internal standard (20  $\mu\text{g}/\text{sample}$ ) and the monosaccharides are identified by their retention times in comparison to standards and the carbohydrate character of these are authenticated by their mass spectra. The glycosyl linkages were summarized in (Table 2). The determination of the sequence of oligosaccharides was done via full MS and fragmentation by (NSI-MS<sup>n</sup>).

**- Table 1 | The total carbohydrate content of the major glycoside rhododendrosaponin III**

| Residue                                 | Weight (ug) <sup>1</sup> | mole% |
|-----------------------------------------|--------------------------|-------|
| Arabinose(Ara)                          | 77.2                     | 27.5  |
| Ribose(Rib)                             | n.d.                     | n.d.  |
| Rhamnose (Rha)                          | 48.4                     | 15.8  |
| Fucose (Fuc)                            | 43.7                     | 14.2  |
| Xylose (Xyl)                            | 86.7                     | 30.9  |
| Glucuronic Acid(GlcUA)                  | n.d.                     | n.d.  |
| Galacturonic acid (GalUA)               | n.d.                     | n.d.  |
| Mannose (Man)                           | n.d.                     | n.d.  |
| Galactose (Gal)                         | n.d.                     | n.d.  |
| Glucose (Glc)                           | 39.2                     | 11.6  |
| N Acetyl Galactosamine (GalNAc)         | n.d.                     | n.d.  |
| N Acetyl Glucosamine (GlcNAc)           | n.d.                     | n.d.  |
| Heptose(Hep)                            | n.d.                     | n.d.  |
| 3 Deoxy-2-manno-2 Octulsonic acid (KDO) | n.d.                     | n.d.  |
| Sum                                     |                          | 100   |



- Table 2 | Glycosyl linkage analysis

| MI021110                                                   | LK000042           |
|------------------------------------------------------------|--------------------|
| Glycosyl Residue                                           | Percentage Present |
| Terminally linked <b>arabinofuranosyl</b> residue (t-Araf) | 2.6                |
| Terminally linked <b>arabinopyranosyl</b> residue (t-Arap) | 21.9               |
| Terminally linked xylopyranosyl residue (t-Xylp)           | 9.2                |
| 4-linked rhamnopyranosyl residue (4-Rhap)                  | 19.7               |
| Terminally linked glucopyranosyl residue (t-Glcp)          | 2.2                |
| 2-linked fucopyranosyl residue (2-Fucp)                    | 1.9                |
| 3-linked xylopyranosyl residue (3-Xylp)                    | 12.0               |
| 2,3-linked fucopyranosyl residue (2,3-Fucp)                | 16.3               |
| 6-linked glucopyranosyl residue (6-Glcp)                   | 8.8                |
| 4-linked glucopyranosyl residue (4-Glcp)                   | 0.7                |
| 2,6-linked glucopyranosyl residue (2,6-Glcp)               | 4.7                |
| <b>Total</b>                                               | <b>100</b>         |

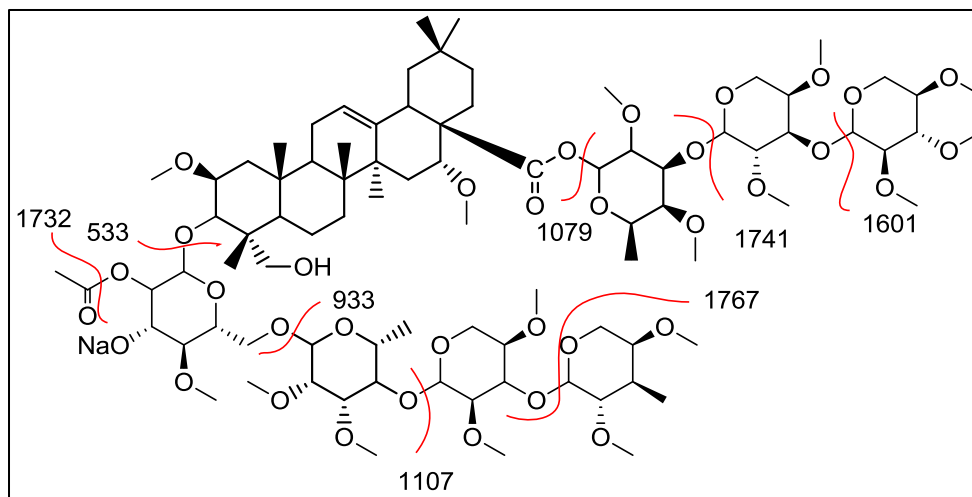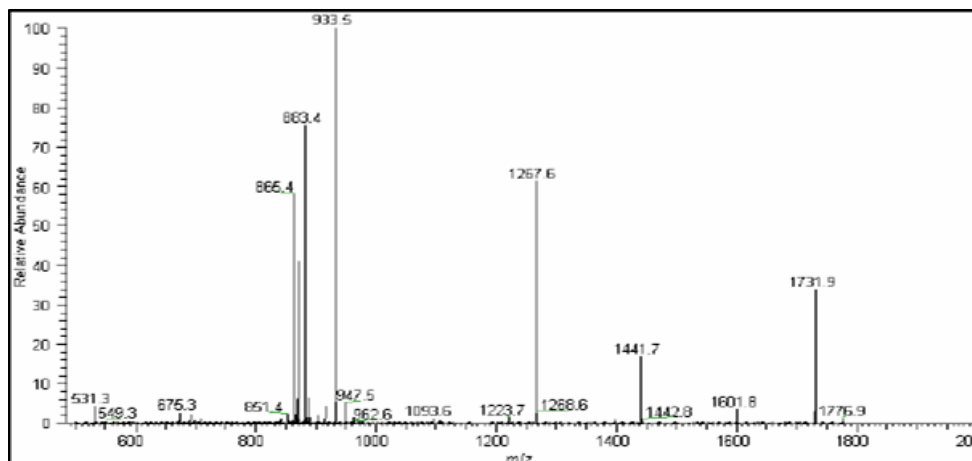

- Supplementary Figure 25 | NSI-MS<sup>n</sup> fragmentation of rhododendrosaponin III

## The absolute configuration determination of the carbohydrate units

- The absolute configuration determination of the carbohydrate units was completed using an HPLC method reported by Tanaka et al. First the compound is hydrolyzed via refluxing in 1 N HCl for 2-3 h followed by extraction with ethyl acetate. The aqueous layer is then neutralized with silver carbonate, centrifuged to remove the insoluble precipitate, dried, refluxed with L-cysteine methyl ester in pyridine for 1 hr at 60-70 °C, followed by the addition of phenylisothiocyanate with extended reflux for an additional 1 hr at 60-70 °C to form the thiazoline derivative that can be detected by UV. This method was tested using various standards, followed by application to the isolated metabolites.

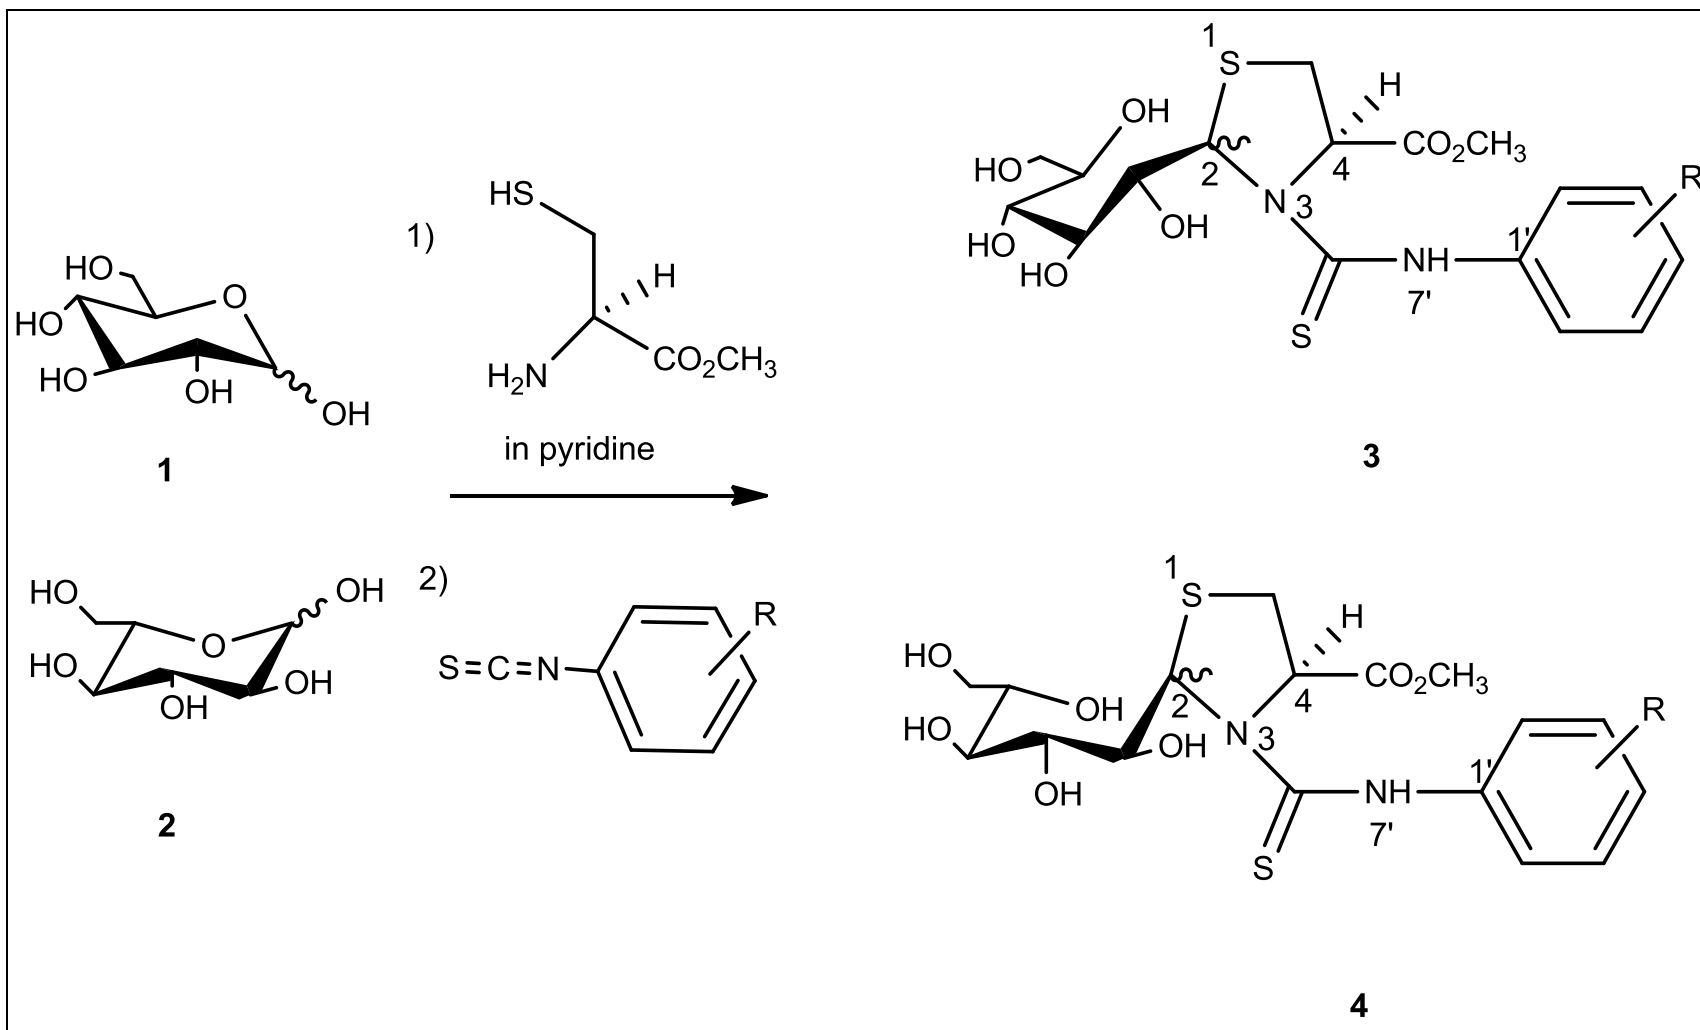

- Supplementary Figure 26 | An investigational method for carbohydrate analysis

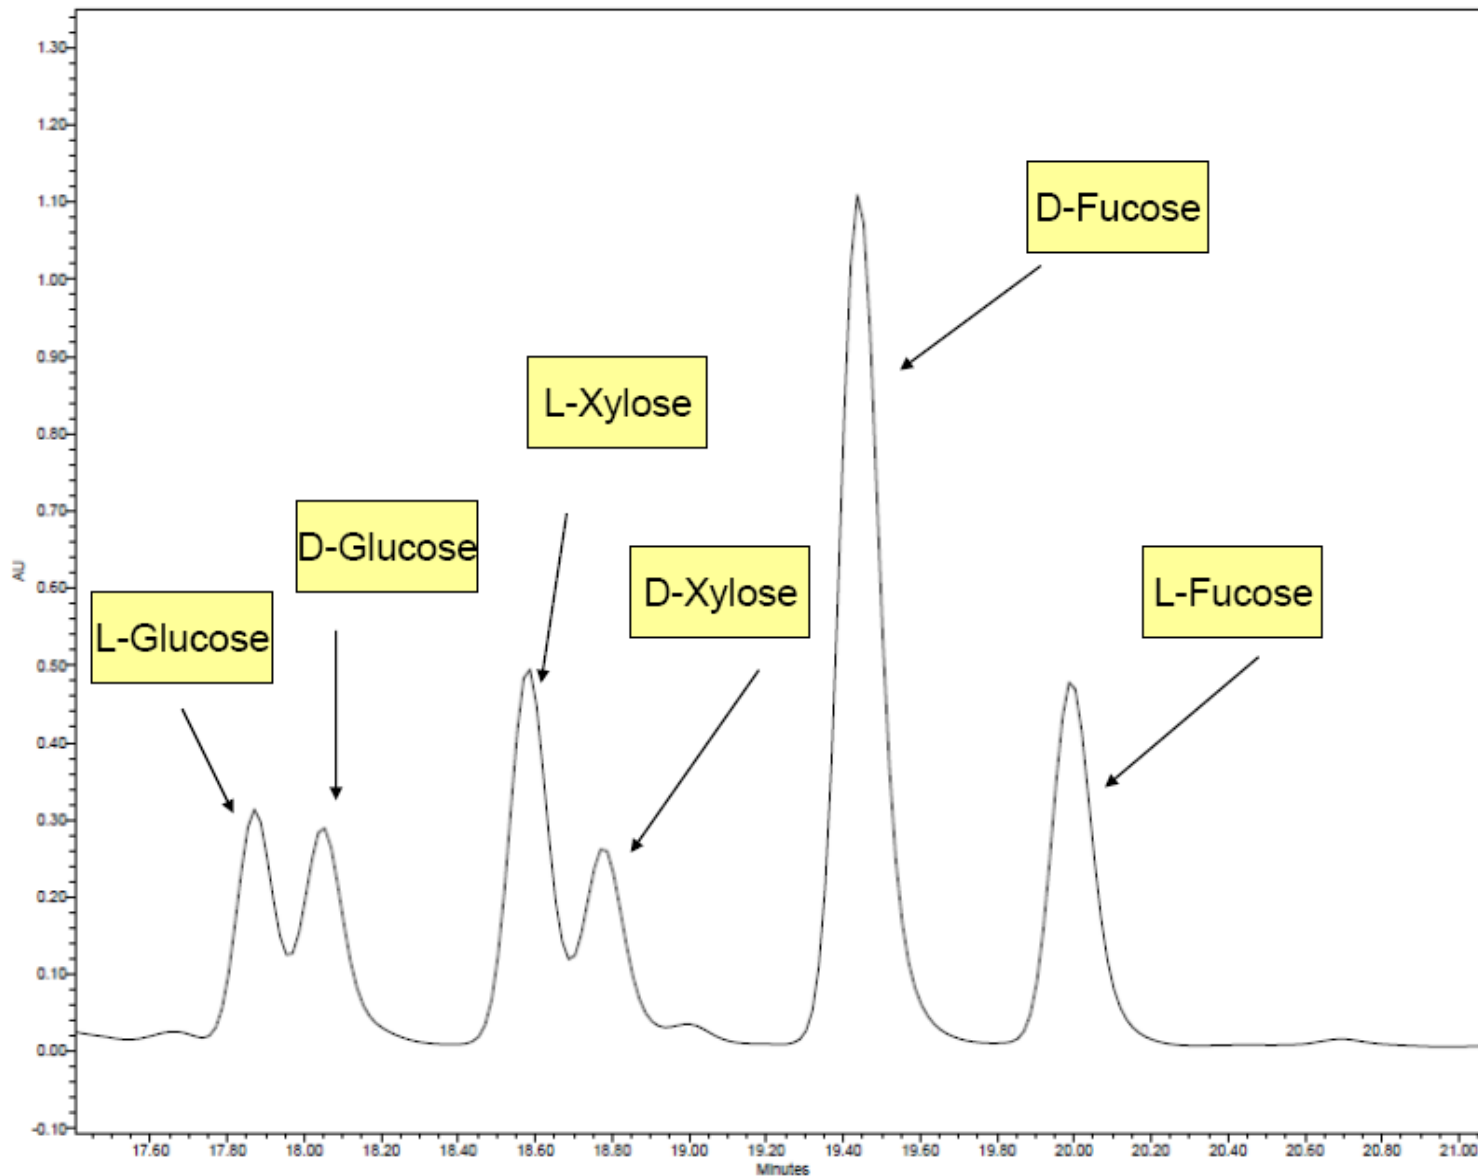

- Supplementary Figure 27 | L- and D- glucose, xylose, and fucose standards by the carbohydrate analysis method

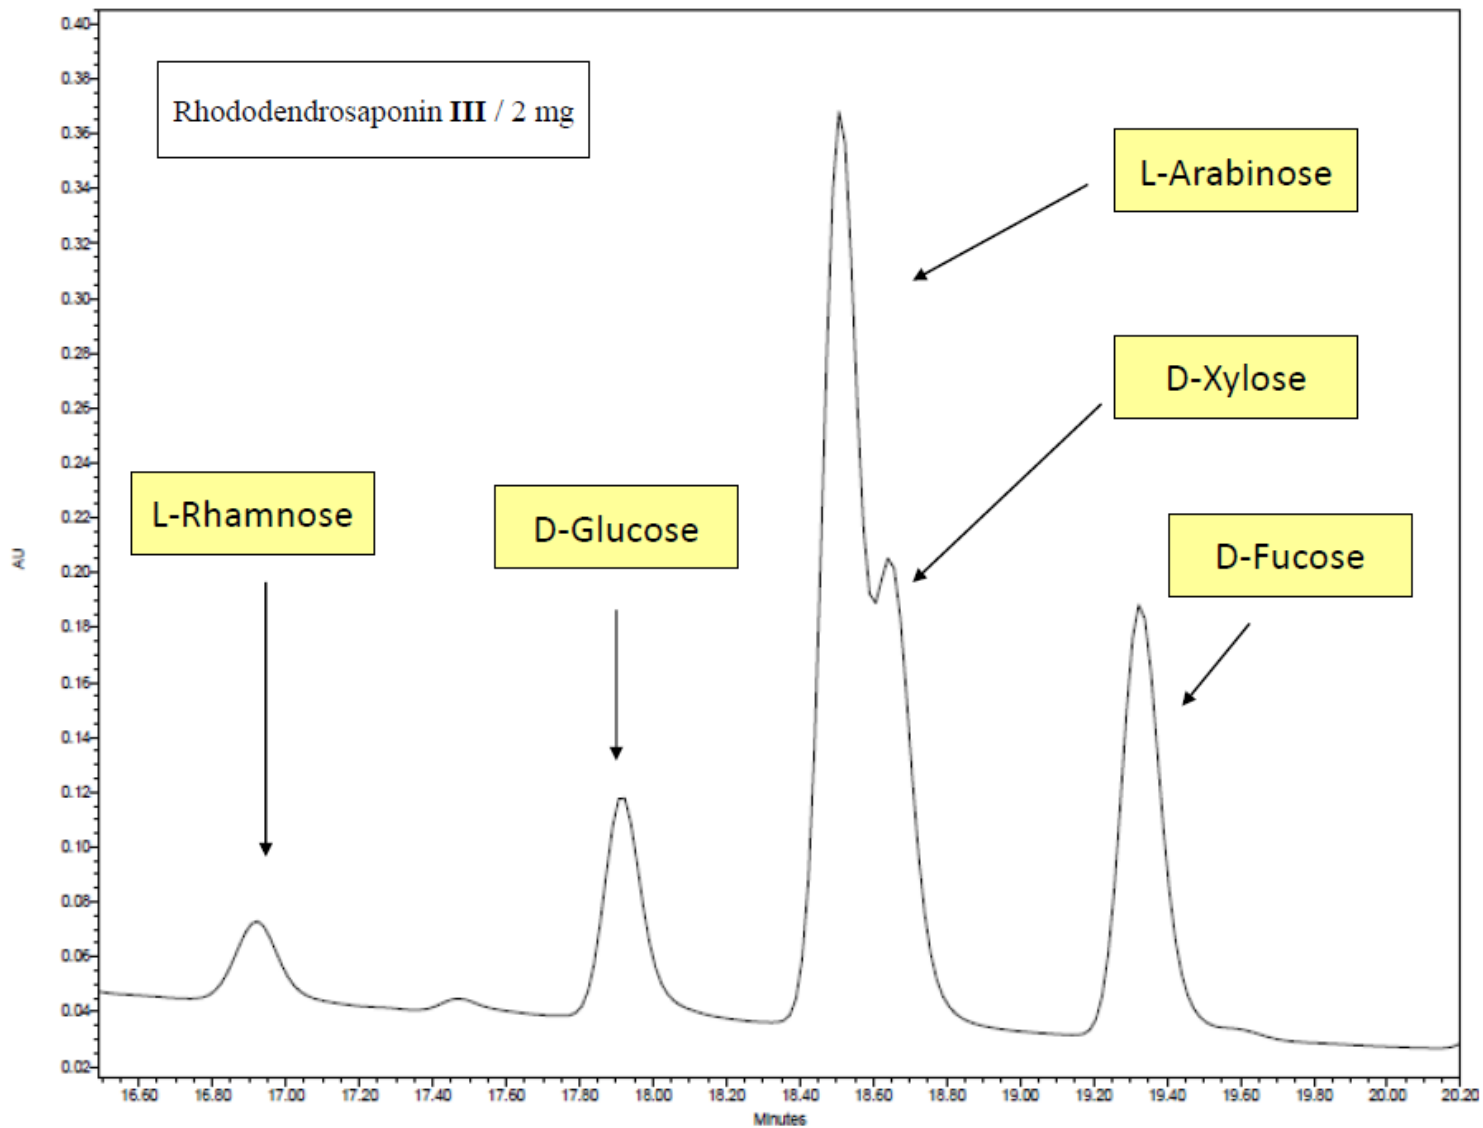

- Supplementary Figure 28 | Carbohydrate analysis for rhododendrosaponin III

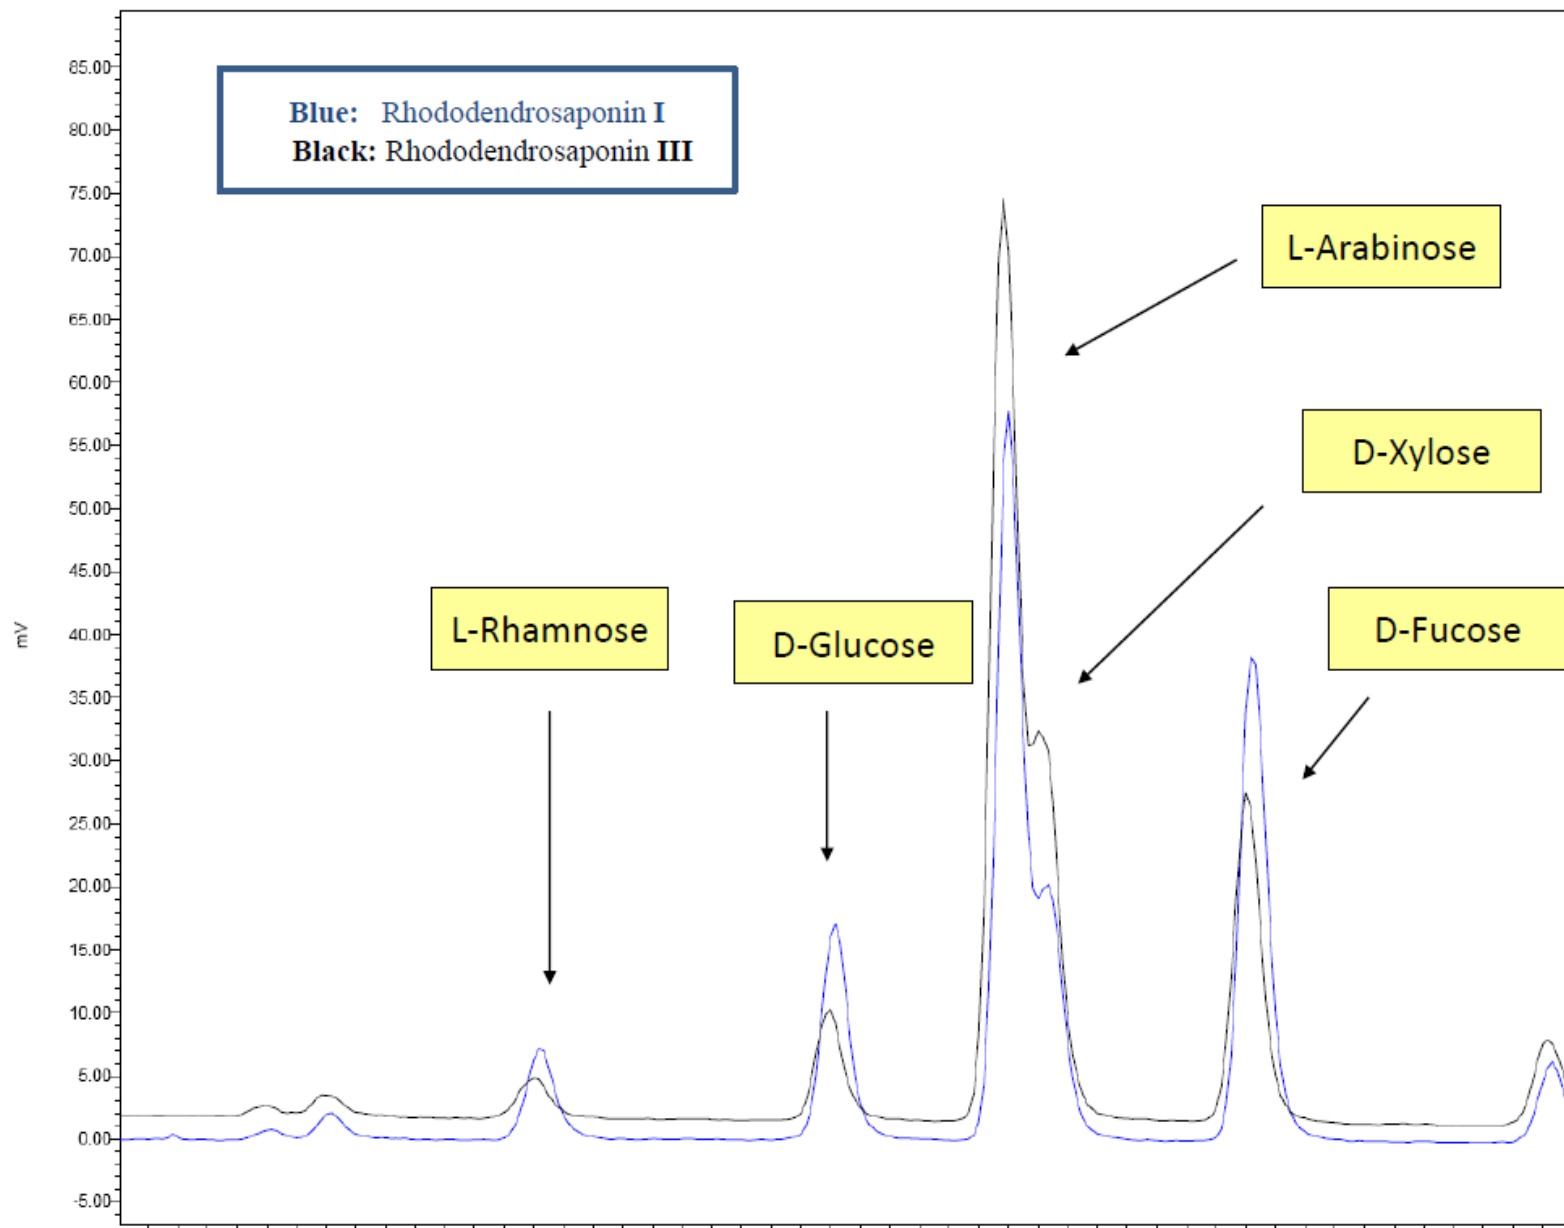

**- Supplementary Figure 29 | Overlay of the carbohydrate analysis chromatograms of rhododendrosaponins I and III**

## Overlaying 2D NMR experiments

- Overlaying the most common 2D NMR experiments including  $^1\text{H}$ - $^{13}\text{C}$ ) Heteronuclear Multiple Quantum Coherence Spectroscopy (HSQC),  $^1\text{H}$ - $^{13}\text{C}$  (2 and 3 bond) Heteronuclear Single bond Correlation Spectroscopy (HMBC) and  $^1\text{H}$  - $^1\text{H}$  Nuclear Overhauser Enhancement spectroscopy (NOESY/ROESY) helped to alleviate the extended time to quickly solve such considerably complex homologous series. Overlaid HSQC data for rhododendrosaponins **I** and **III** revealed a high level of homology with interchangeable  $\alpha$ - and  $\beta$ - configuration at C-24 of rhododendrosaponins **I**. This was confirmed with the HSQC, HMBC, and ROESY spectra of rhododendrosaponins **I**. Interestingly, the superimposed data clearly demonstrated the presence of the uncommon Amadori-type pyranose-furanose isomerism of the terminal L-arbinosyl moiety. It was possible to monitor the presence of acyclic intermediate (-CHO) at 218.1 ppm. As further evidence, the glycosyl linkage analysis (Table 2) confirmed the presence of both forms. These data explain the complex NMR spectra for these compounds.



HSQCAD01  
313K MI-HCV-4-T HSQCAD  
1 1

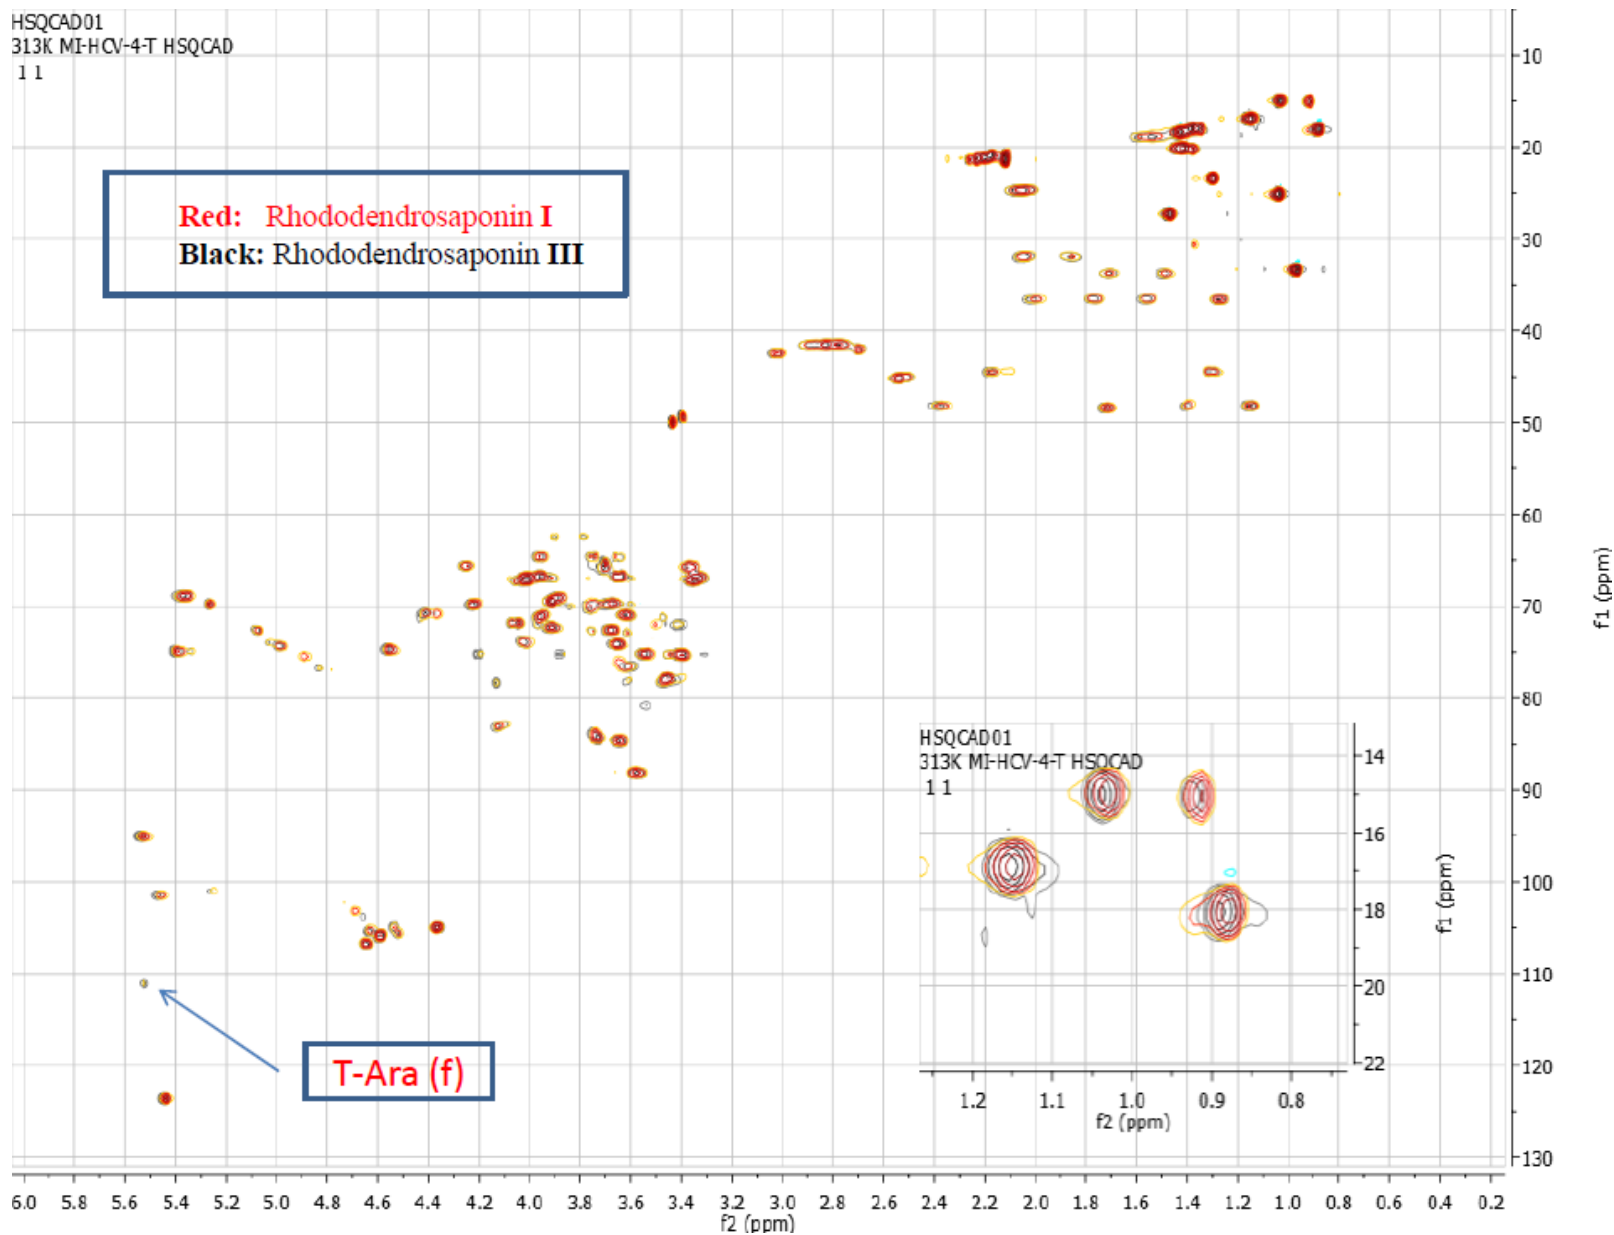

- Supplementary Figure 30 | Overlaid HSQC spectra of rhododendrosaponins I and III

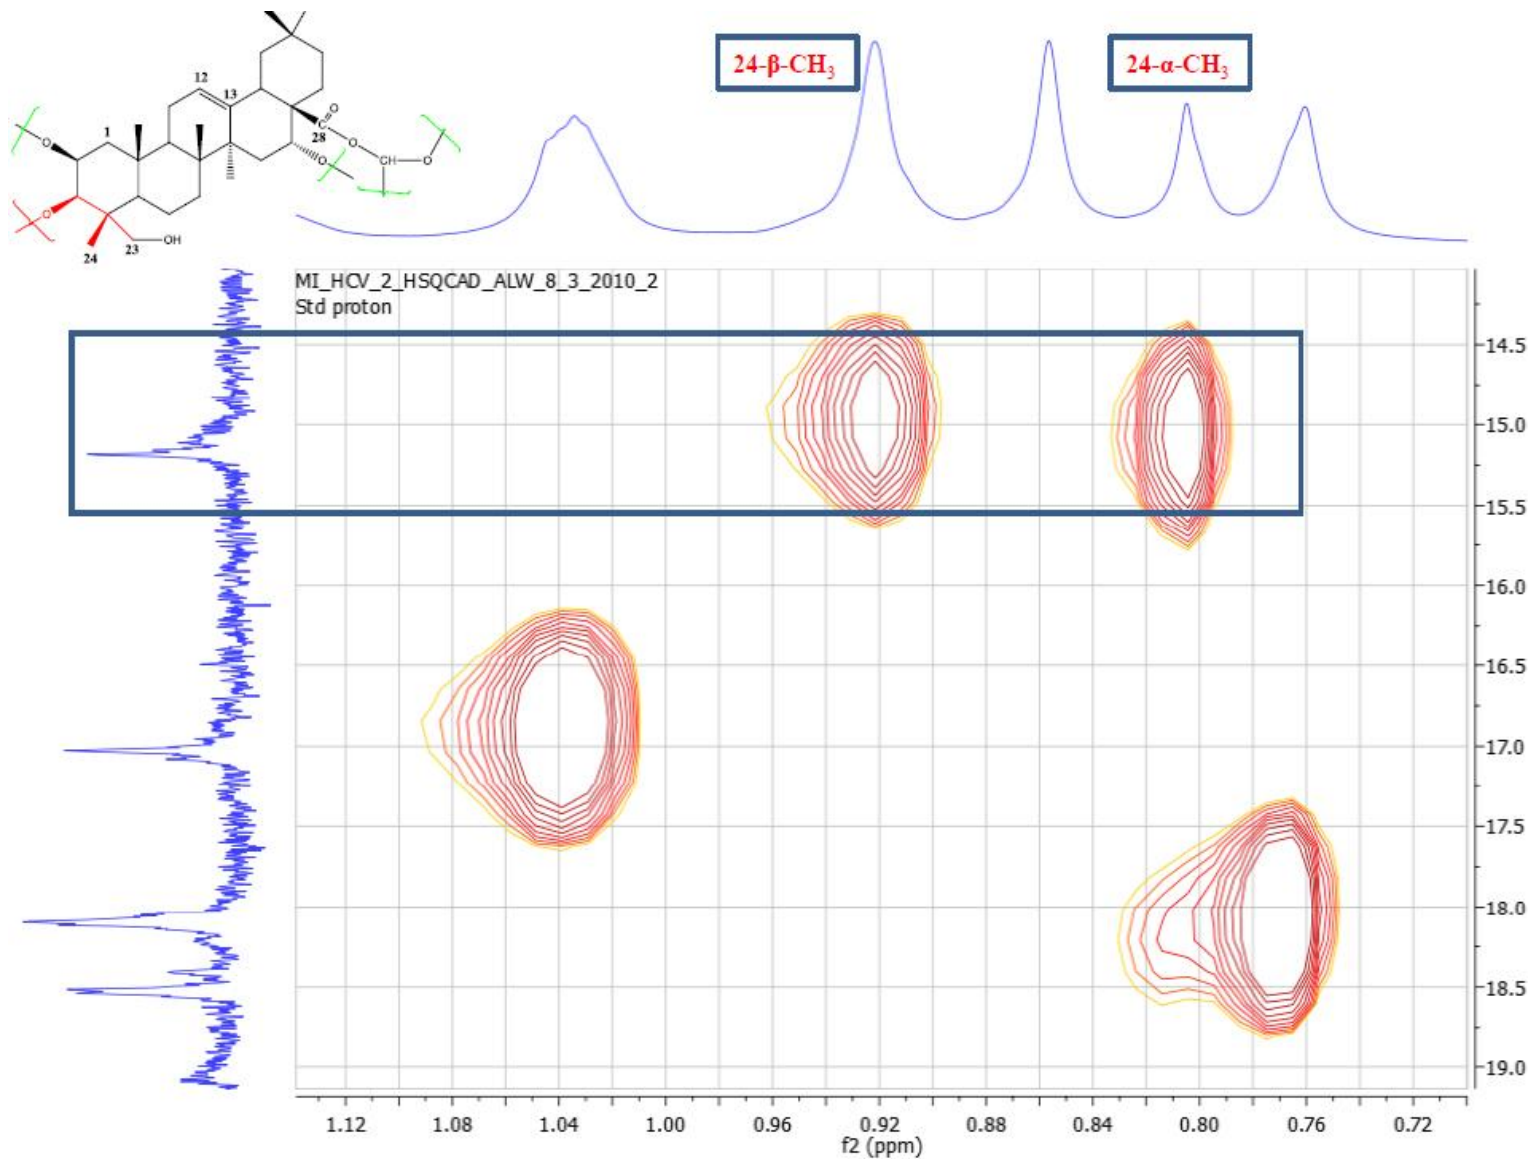

- Supplementary Figure 31 | The expanded HSQC spectrum of rhododendrosaponin I in methanol-*d*<sub>4</sub> (600 MHz) shows the presence of  $\alpha$  and  $\beta$  isomers at C-24

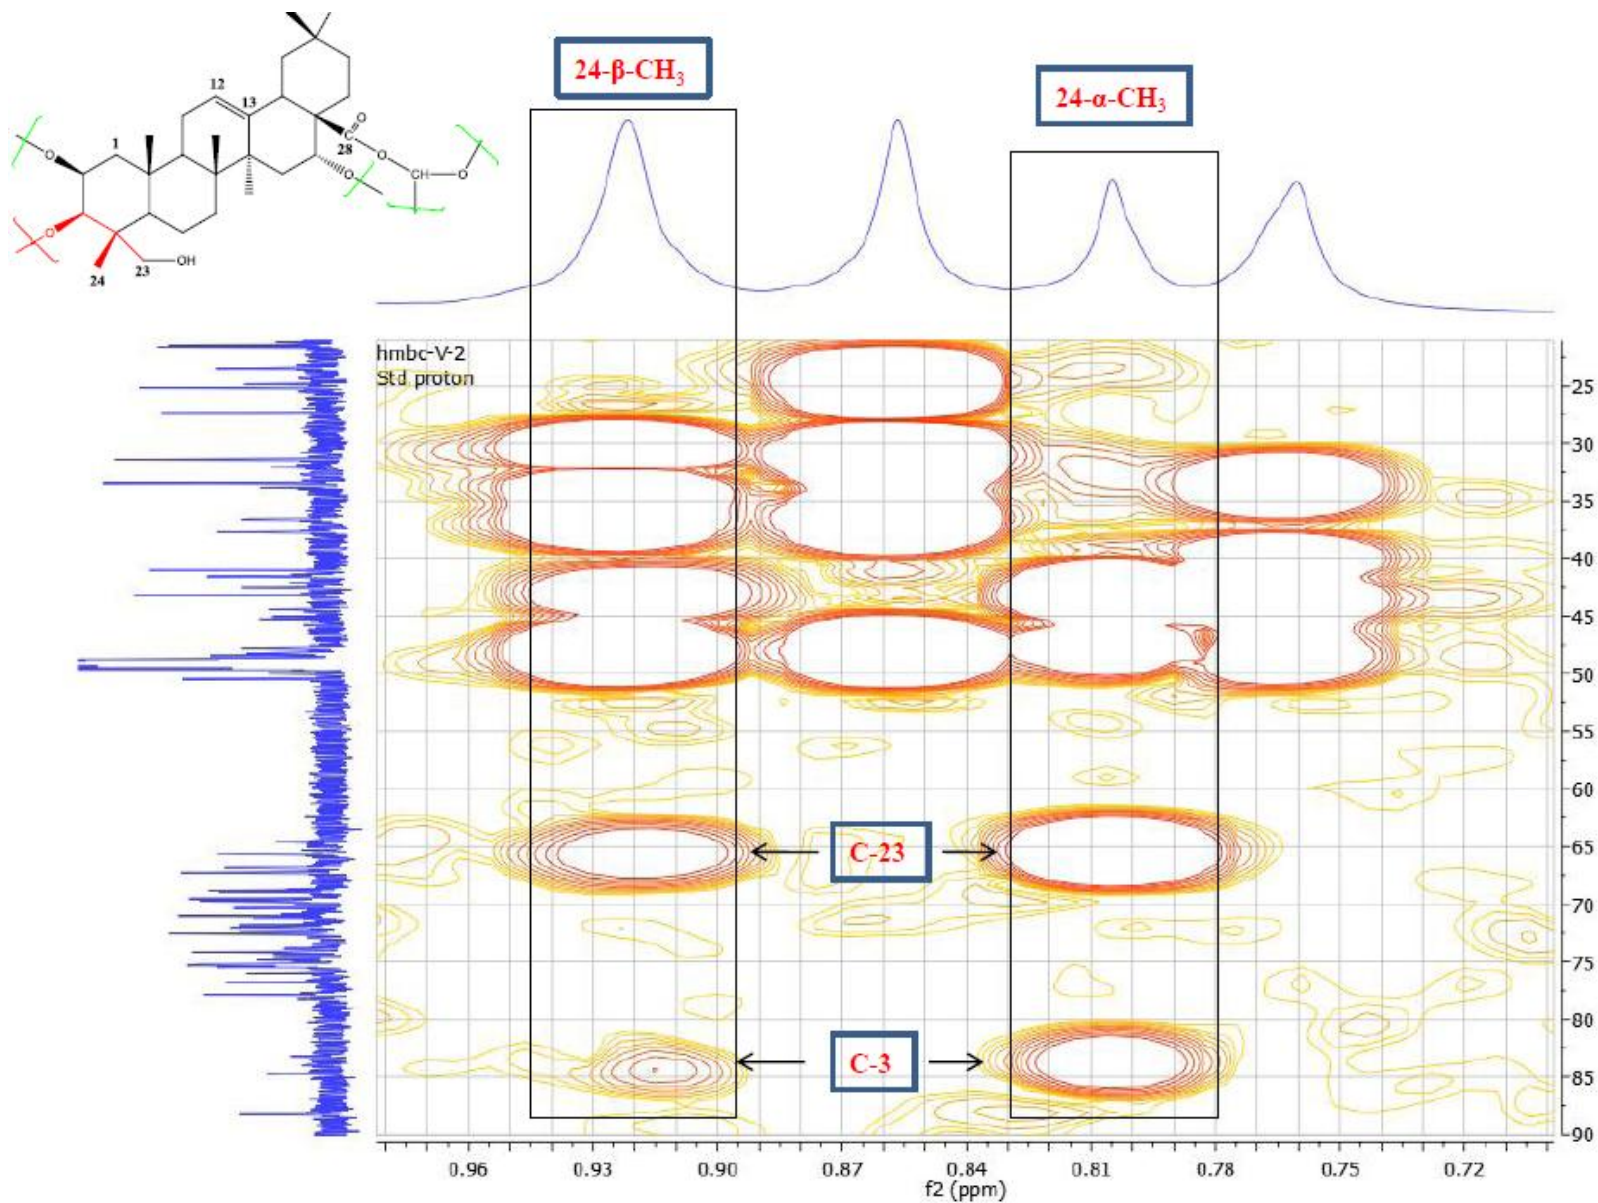

- Supplementary Figure 32 | The expanded HMBC spectrum of rhododendrosaponin I in methanol-*d*<sub>4</sub> (600 MHz) shows the presence of  $\alpha$  and  $\beta$  isomers at C-24

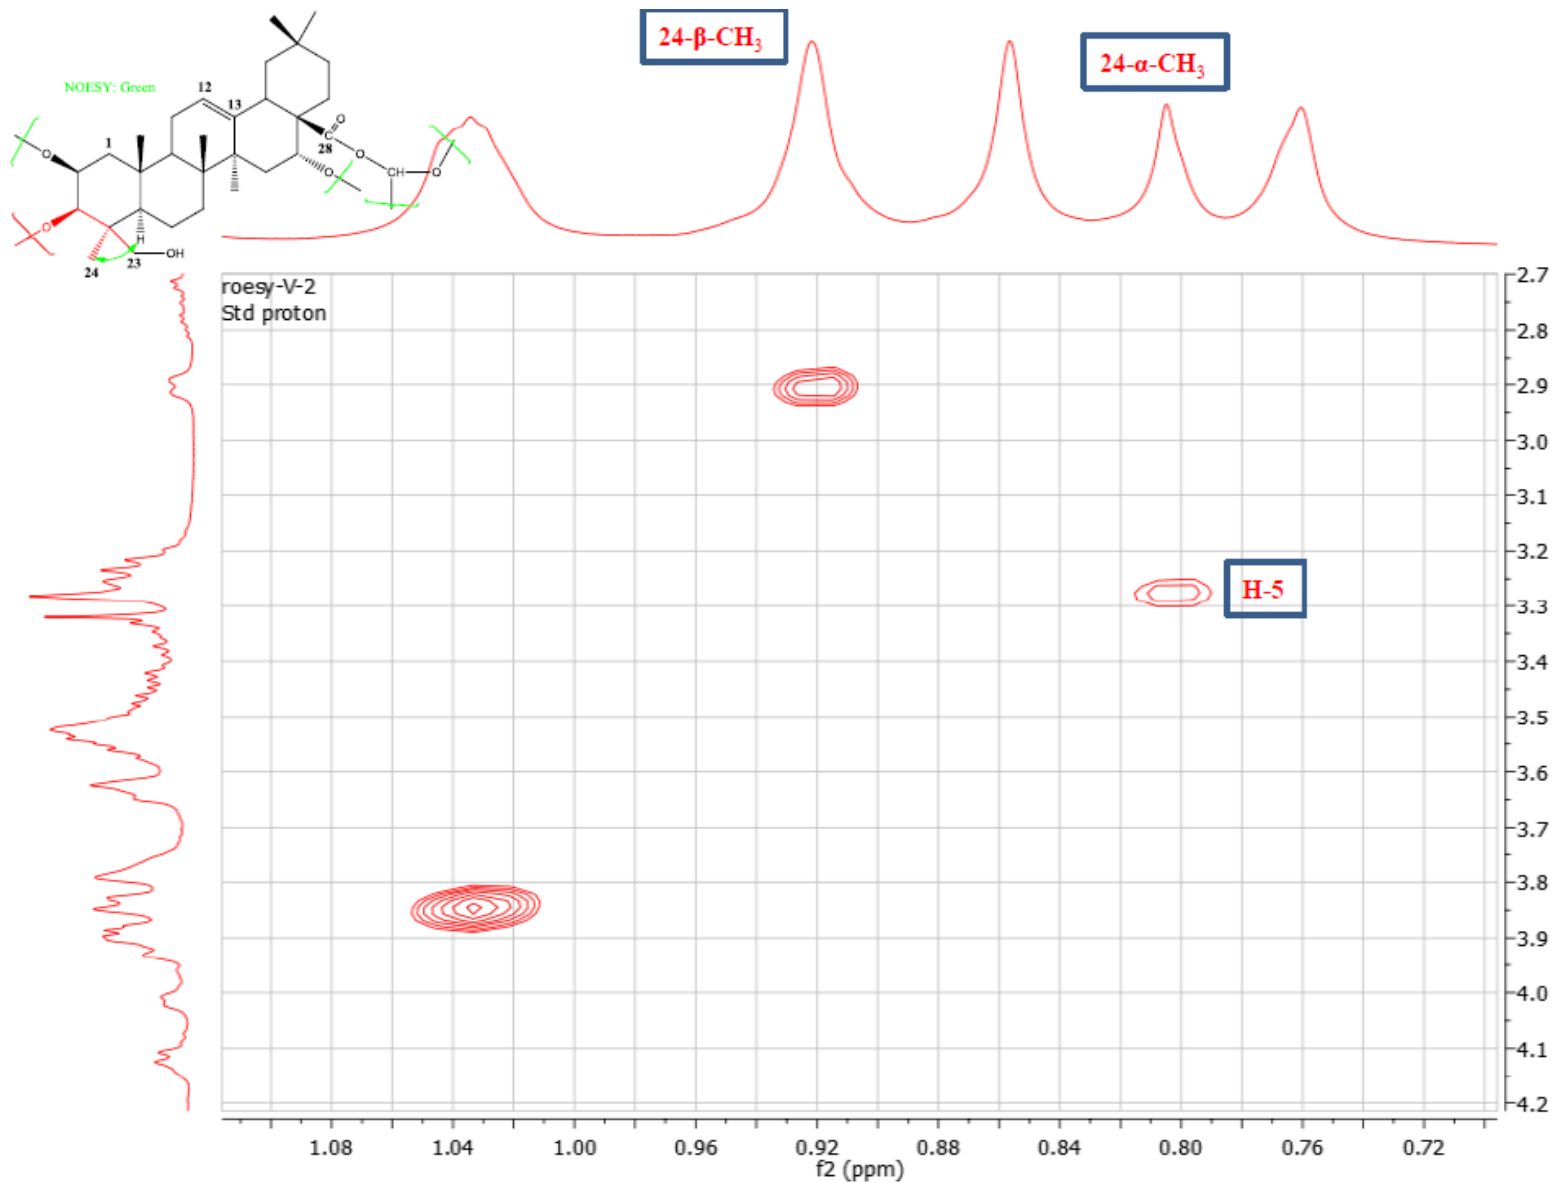

- Supplementary Figure 33 | The expanded ROESY spectrum of rhododendrosaponin I in methanol-*d*<sub>4</sub> (600 MHz) shows the presence of  $\alpha$  and  $\beta$  isomers at C-24

dept-v-2  
Heteronuclear polarization transfer experiment

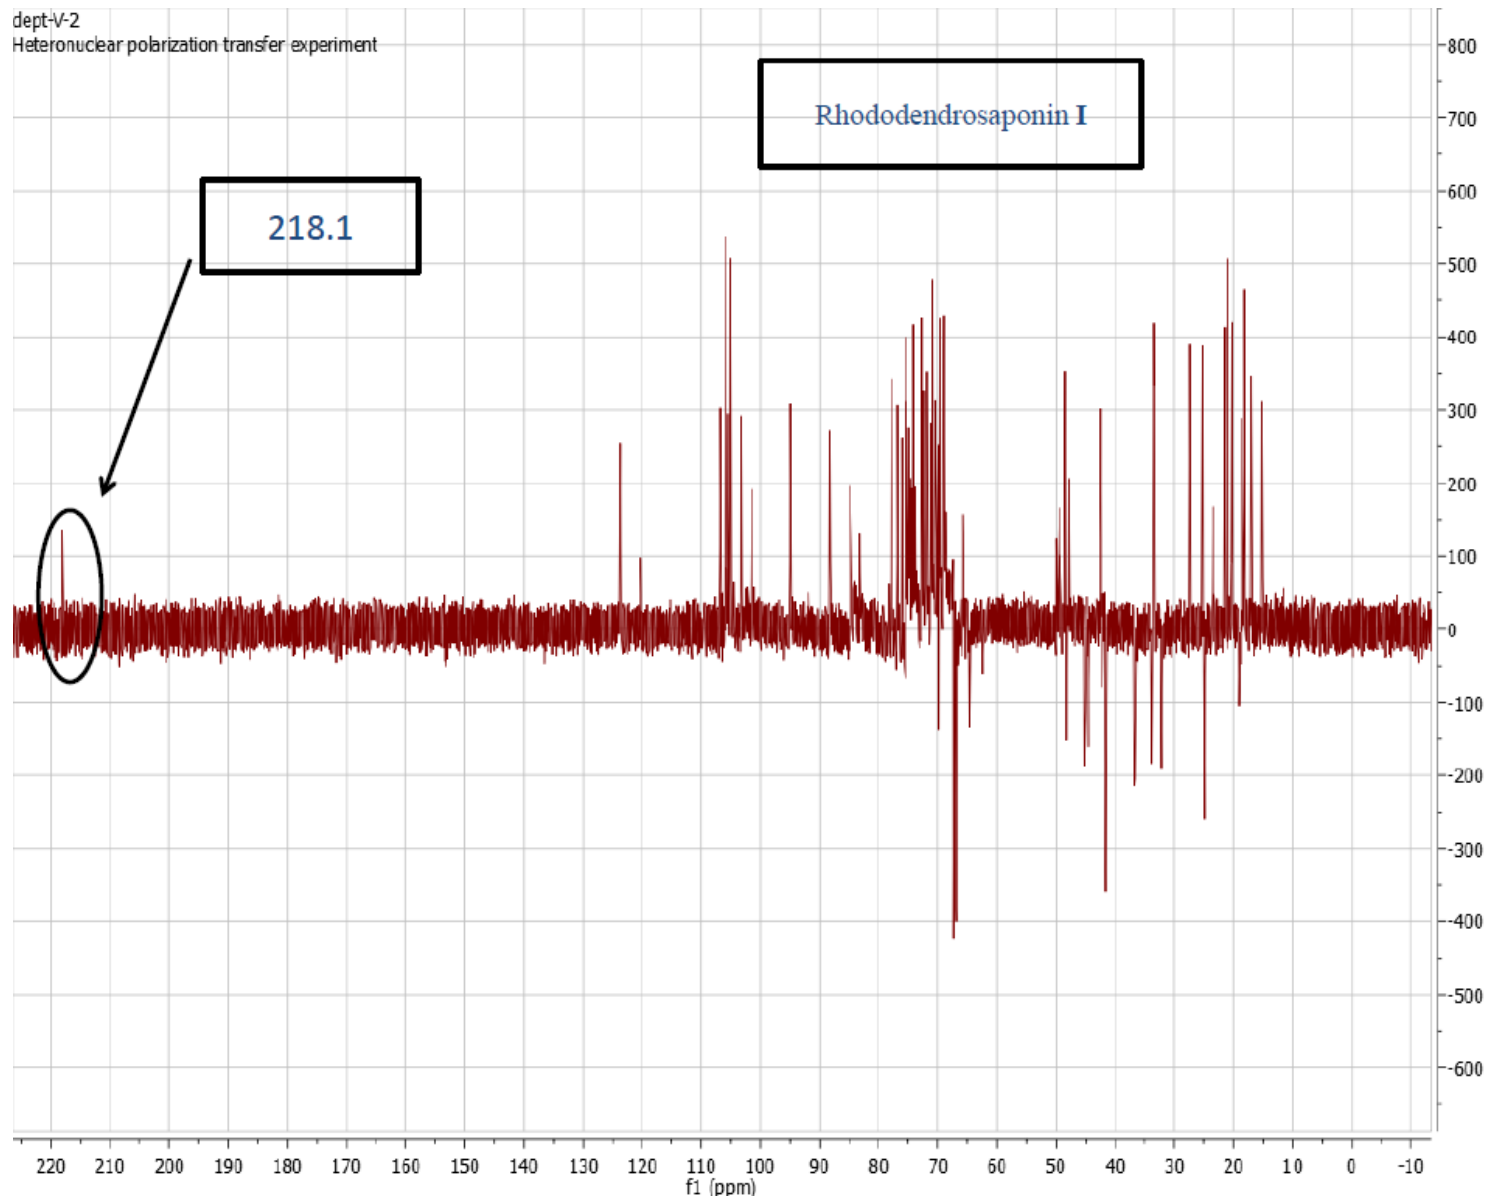

- Supplementary Figure 34 |  $135^\circ$  DEPT spectrum of rhododendrosaponin I in methanol- $d_4$  (600 MHz) shows the presence of (-CHO) for the acyclic intermediate

- In a similar manner stacked HSQC studies for rhododendrosaponins **II** and **III** revealed high level of similarity with pyranose-furanose isomerism. This was confirmed by monitoring the presence of the acyclic intermediate (-CHO) at 217.590 ppm, as well as the presence of arbinofuranosyl unit in rhododendrosaponin **II**. Further investigation through co-injection of rhododendrosaponins **II** and **III** on 250 × 21.2 mm NH<sub>2</sub> column with CHCl<sub>3</sub>-MeOH confirms the isomerization.

HSQCAD01  
313K MI-HCV-4-T HSQCAD  
1 1

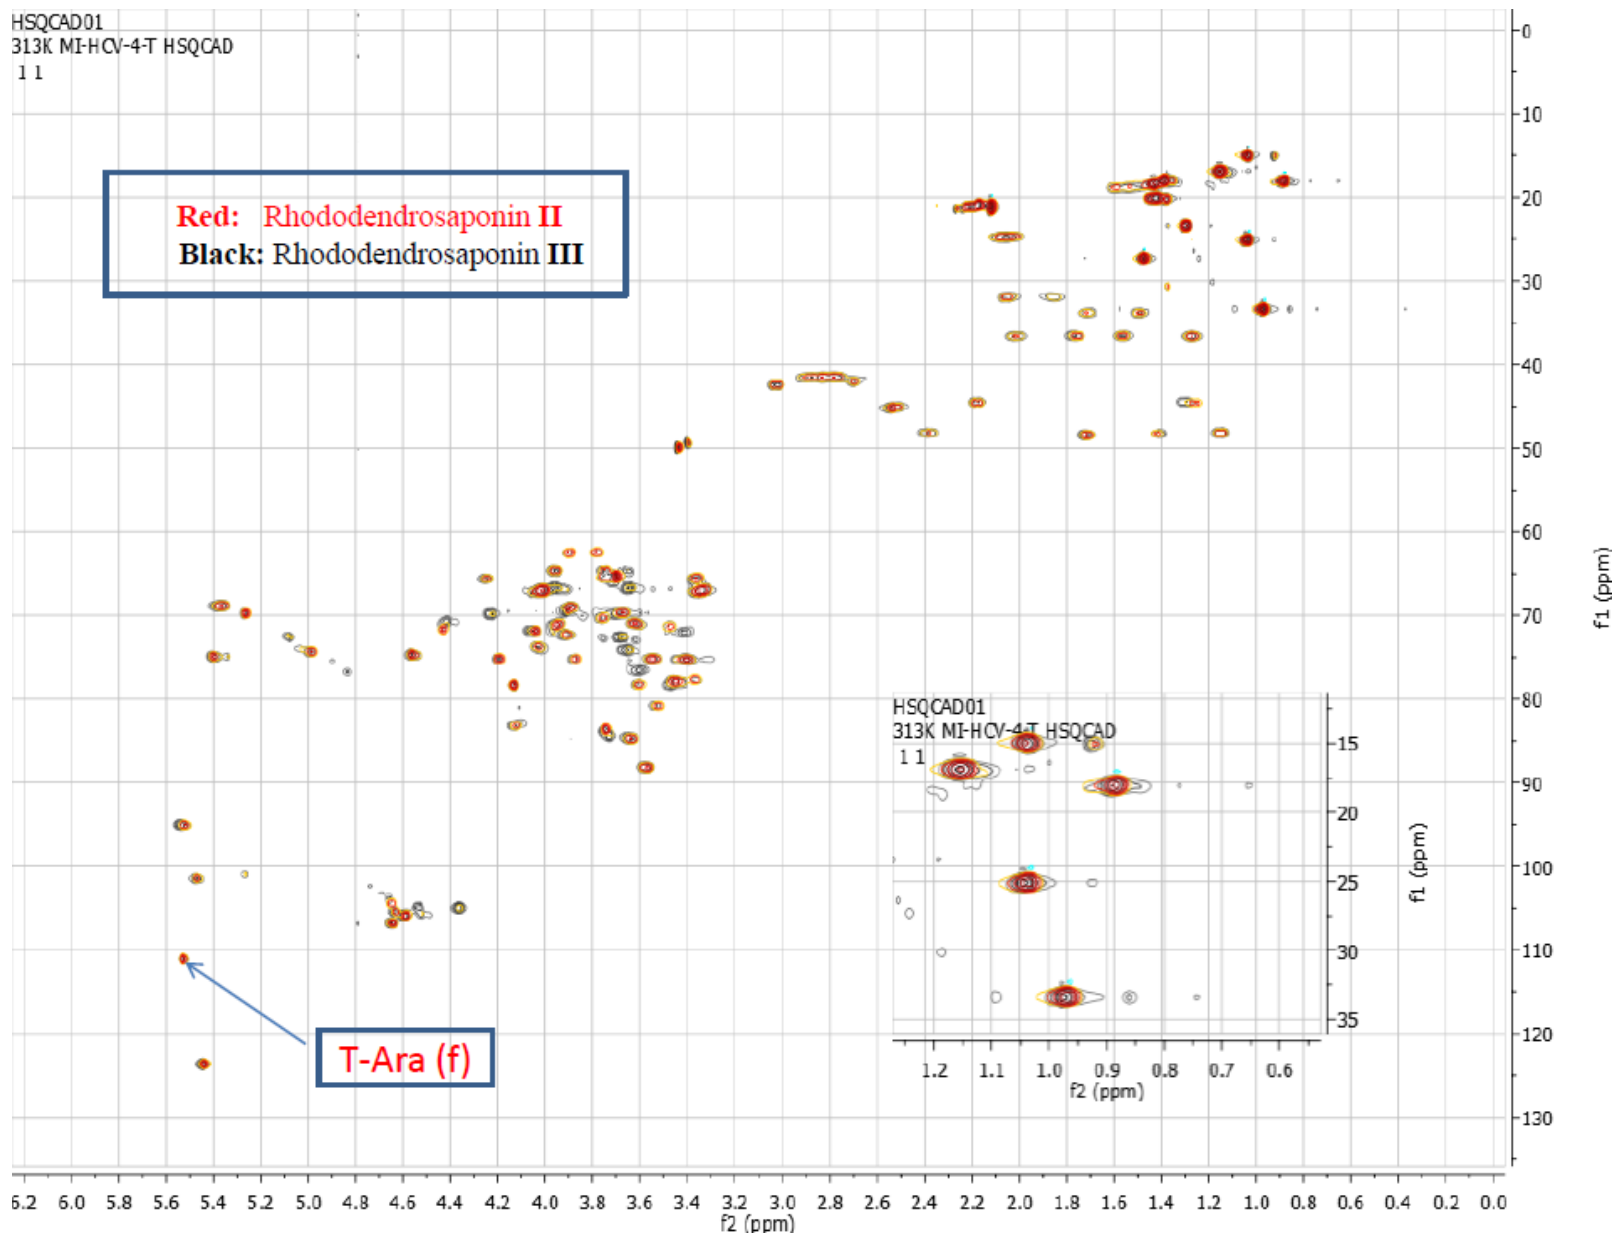

- Supplementary Figure 35 | Overlaid HSQC spectra of rhododendrosaponins II and III





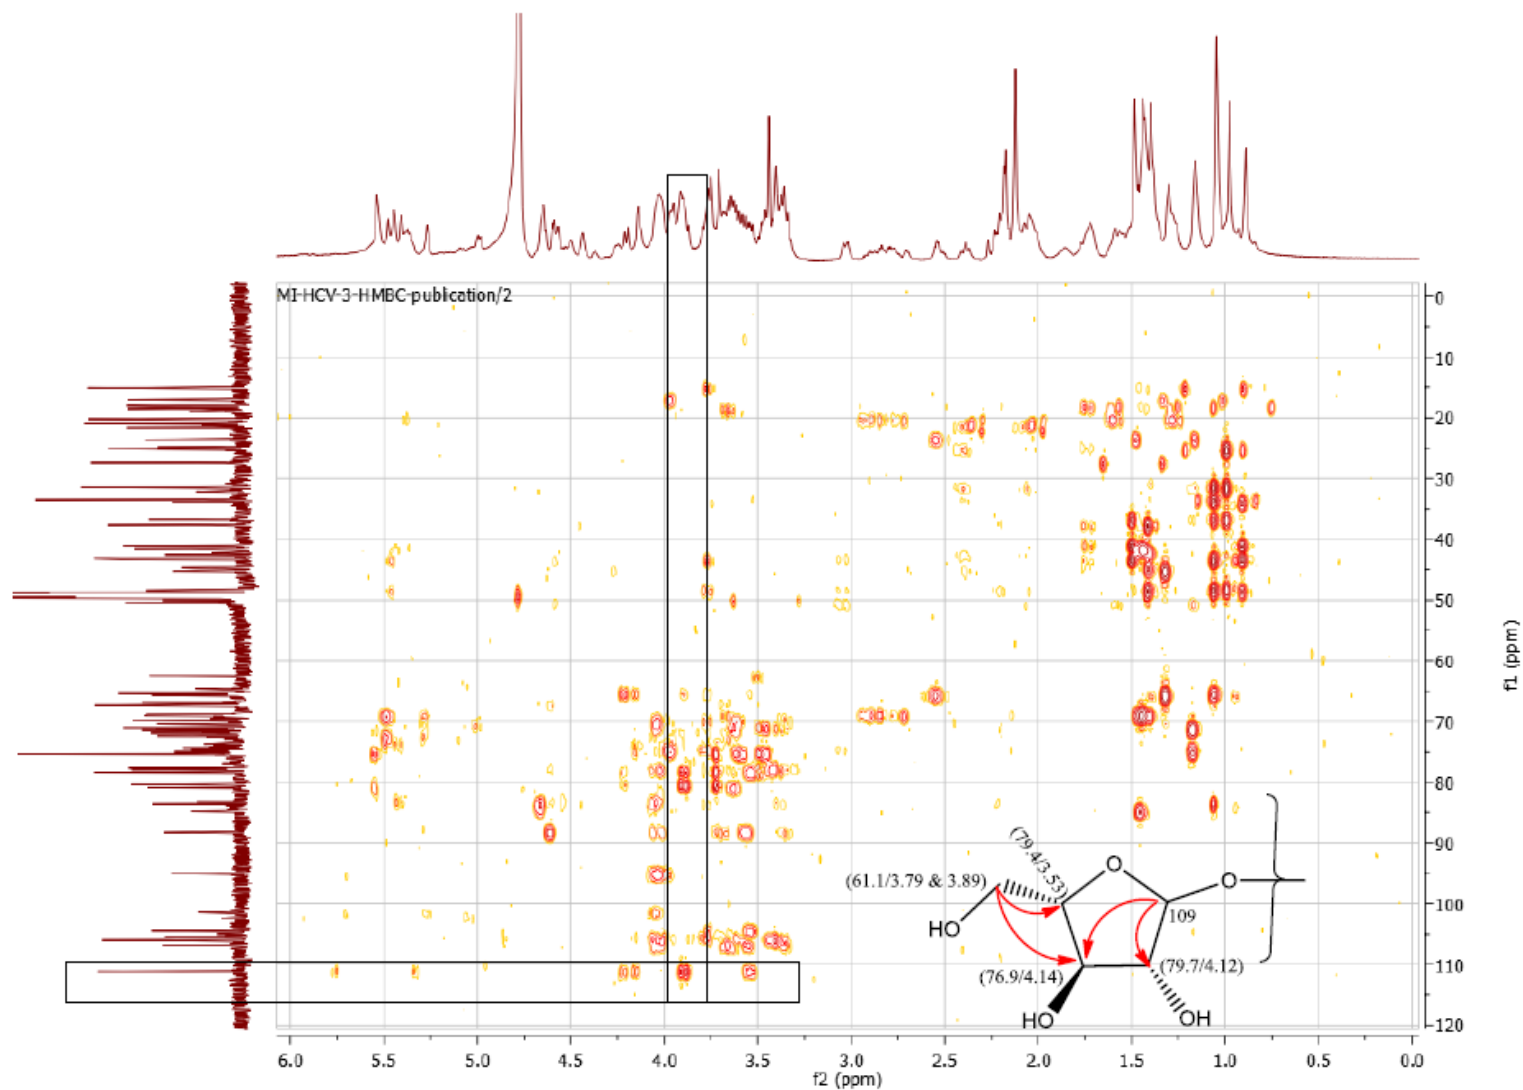

- **Supplementary Figure 37 | Expanded HMBC spectrum of rhododendrosaponin II in methanol- $d_4$  (600 MHz) shows the presence of arbinofuranosyl moiety**

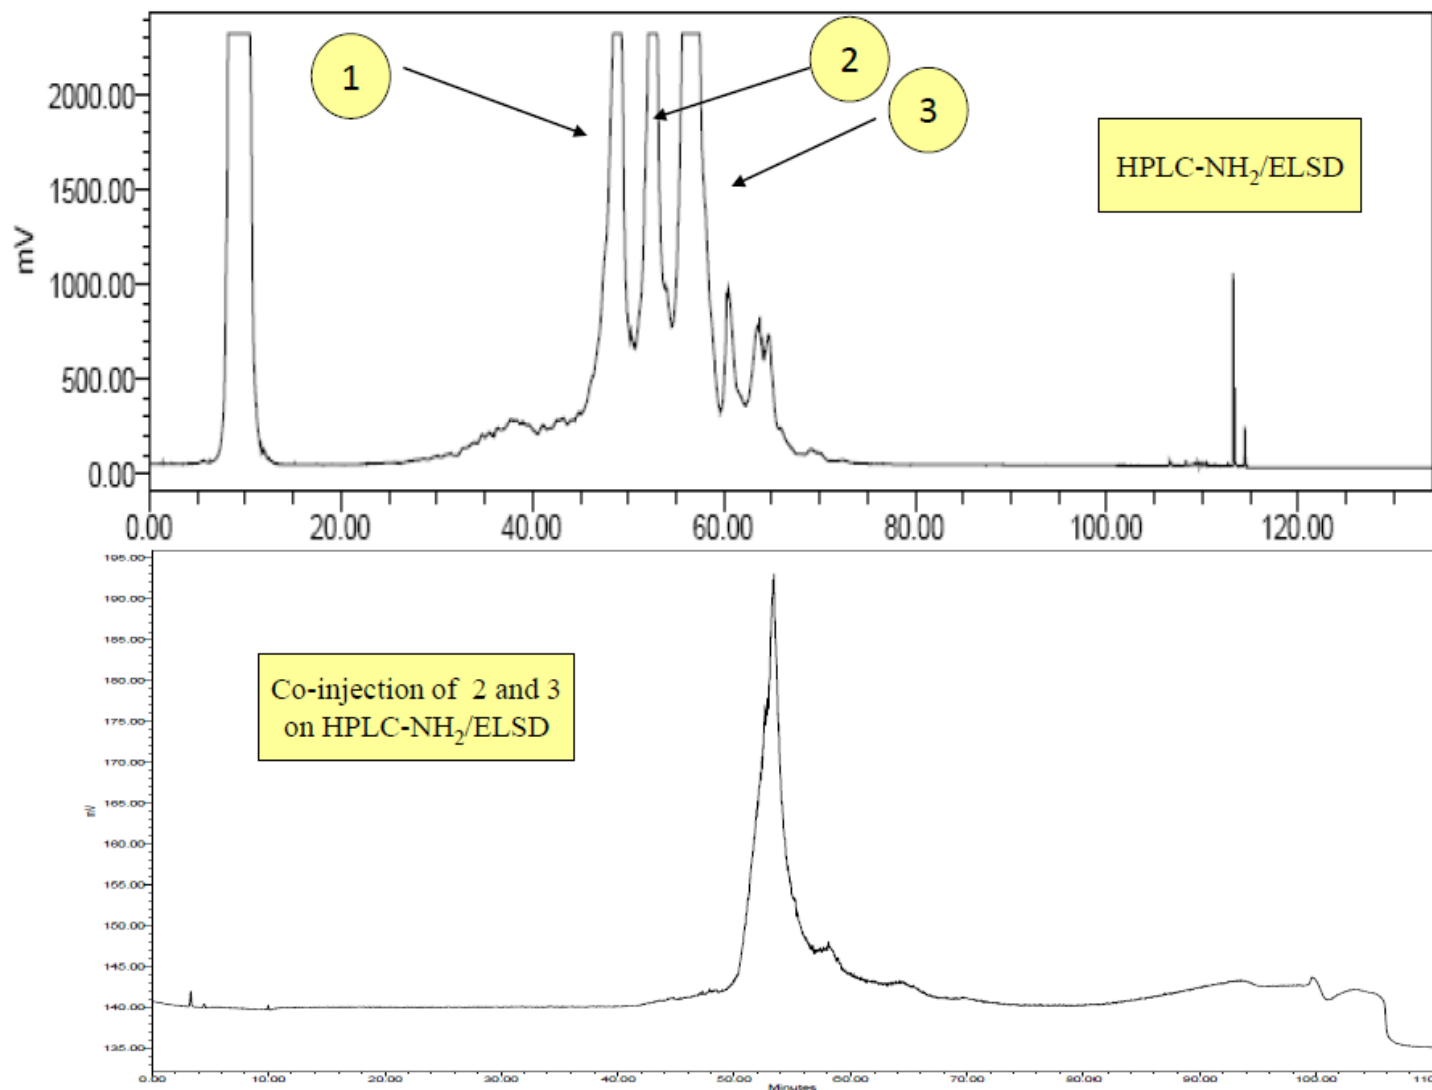

- **Supplementary Figure 38 | Co-injection of rhododendrosaponins II and III on 250 × 4.6 mm NH<sub>2</sub> column**

-  $^1\text{H}$  NMR data for rhododendrosaponins **I** established the  $\beta$ -configuration of the following glycosyl groups: fucosyl (5.42 d, 7.8 Hz), glucosyl (4.57, 7.8 Hz), terminal xylosyl (4.24 d, 6.0 Hz), inner xylosyl (4.52 d, 6.0 Hz), terminal arabinosyl (4.48 d, 7.8 Hz), and inner arabinosyl (4.54 d, 6.6 Hz), while  $\alpha$ -configuration of rhamnosyl (5.35, s). The  $3\beta$  absolute configuration of 3-hydroxybutanoate was determined by acid-catalyzed methanolysis. This was followed by comparison with (R) and (S) standards using a chiral GC column [RESTEK capillary column: St- $\beta$ DEXsa (30 m x 0.32 mm x 0.25  $\mu\text{m}$ )].

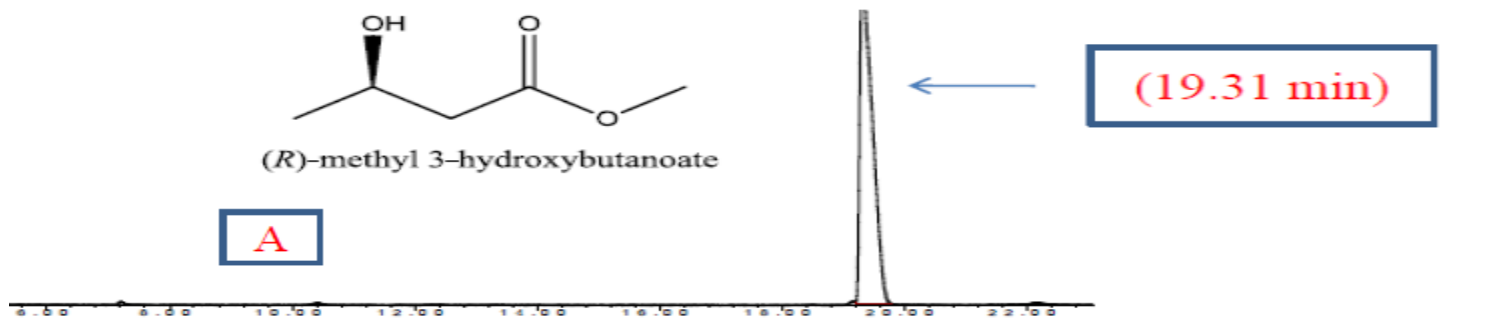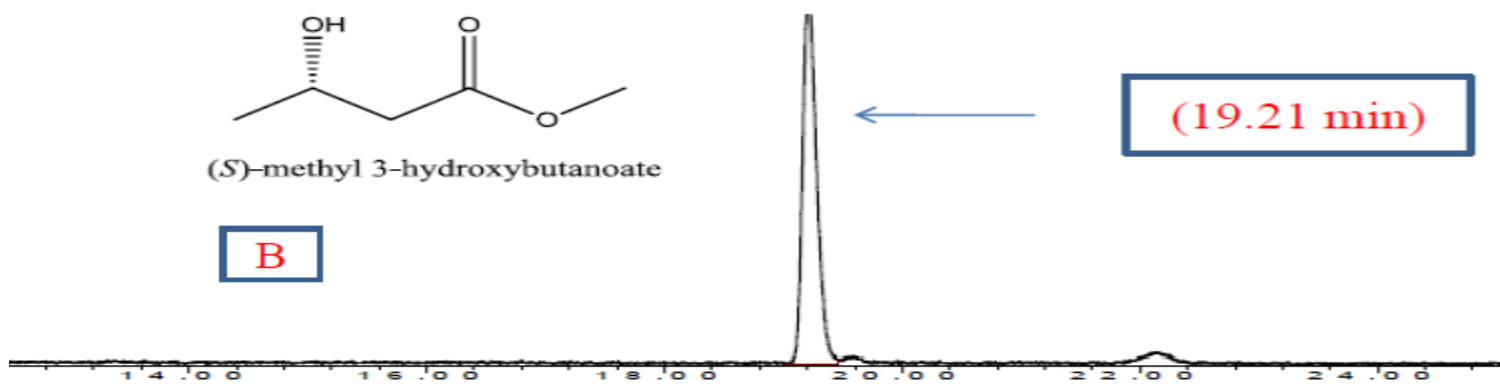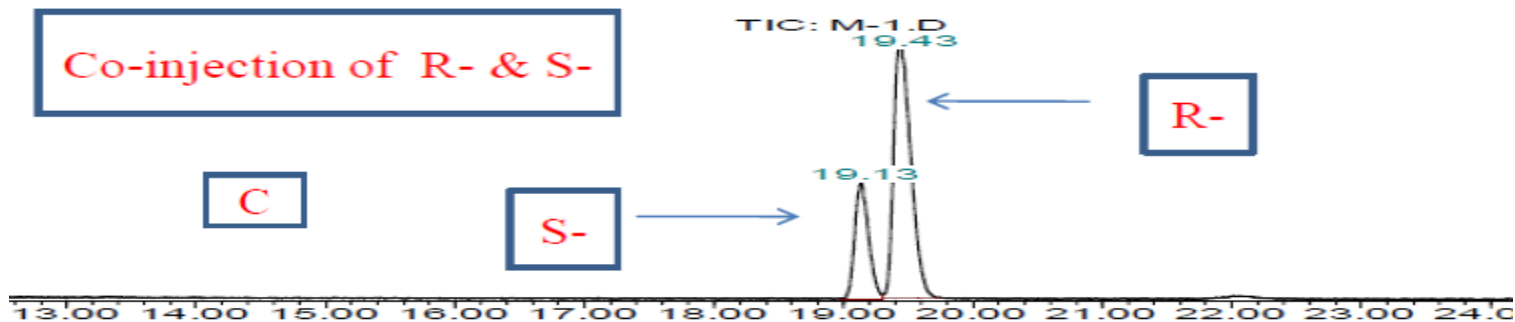

- Supplementary Figure 39 | GC chromatograms of: A) (R)-methyl 3-hydroxybutanoate, B) (S)-methyl 3-hydroxybutanoate, C) Co-injection of (R) and (S)-methyl 3-hydroxybutanoate

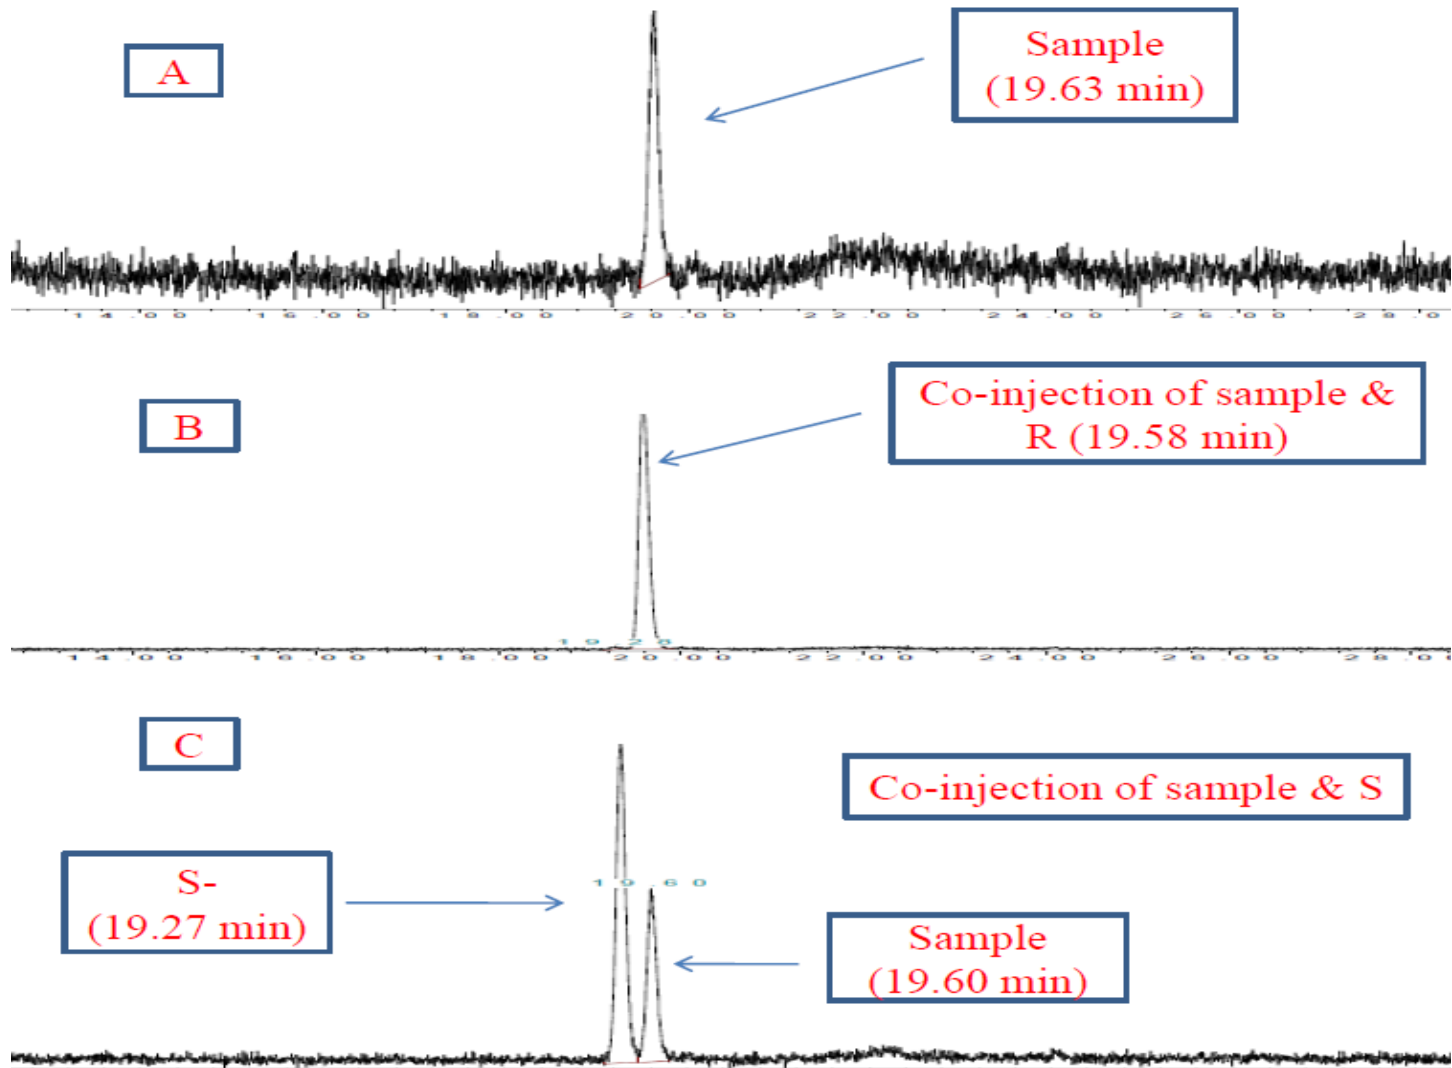

- Supplementary Figure 40 | GC chromatograms of: A) rhododendrosaponins I-III after methanolysis, B) Co-injection of the sample and (R)-methyl 3-hydroxybutanoate, C) Co-injection of the sample and (S)-methyl 3-hydroxybutanoate chromatograms of: A) (R)-methyl 3-hydroxybutanoate, B) (S)-methyl 3-hydroxybutanoate, C) Co-injection of (R) and (S)-methyl 3-hydroxybutanoate.

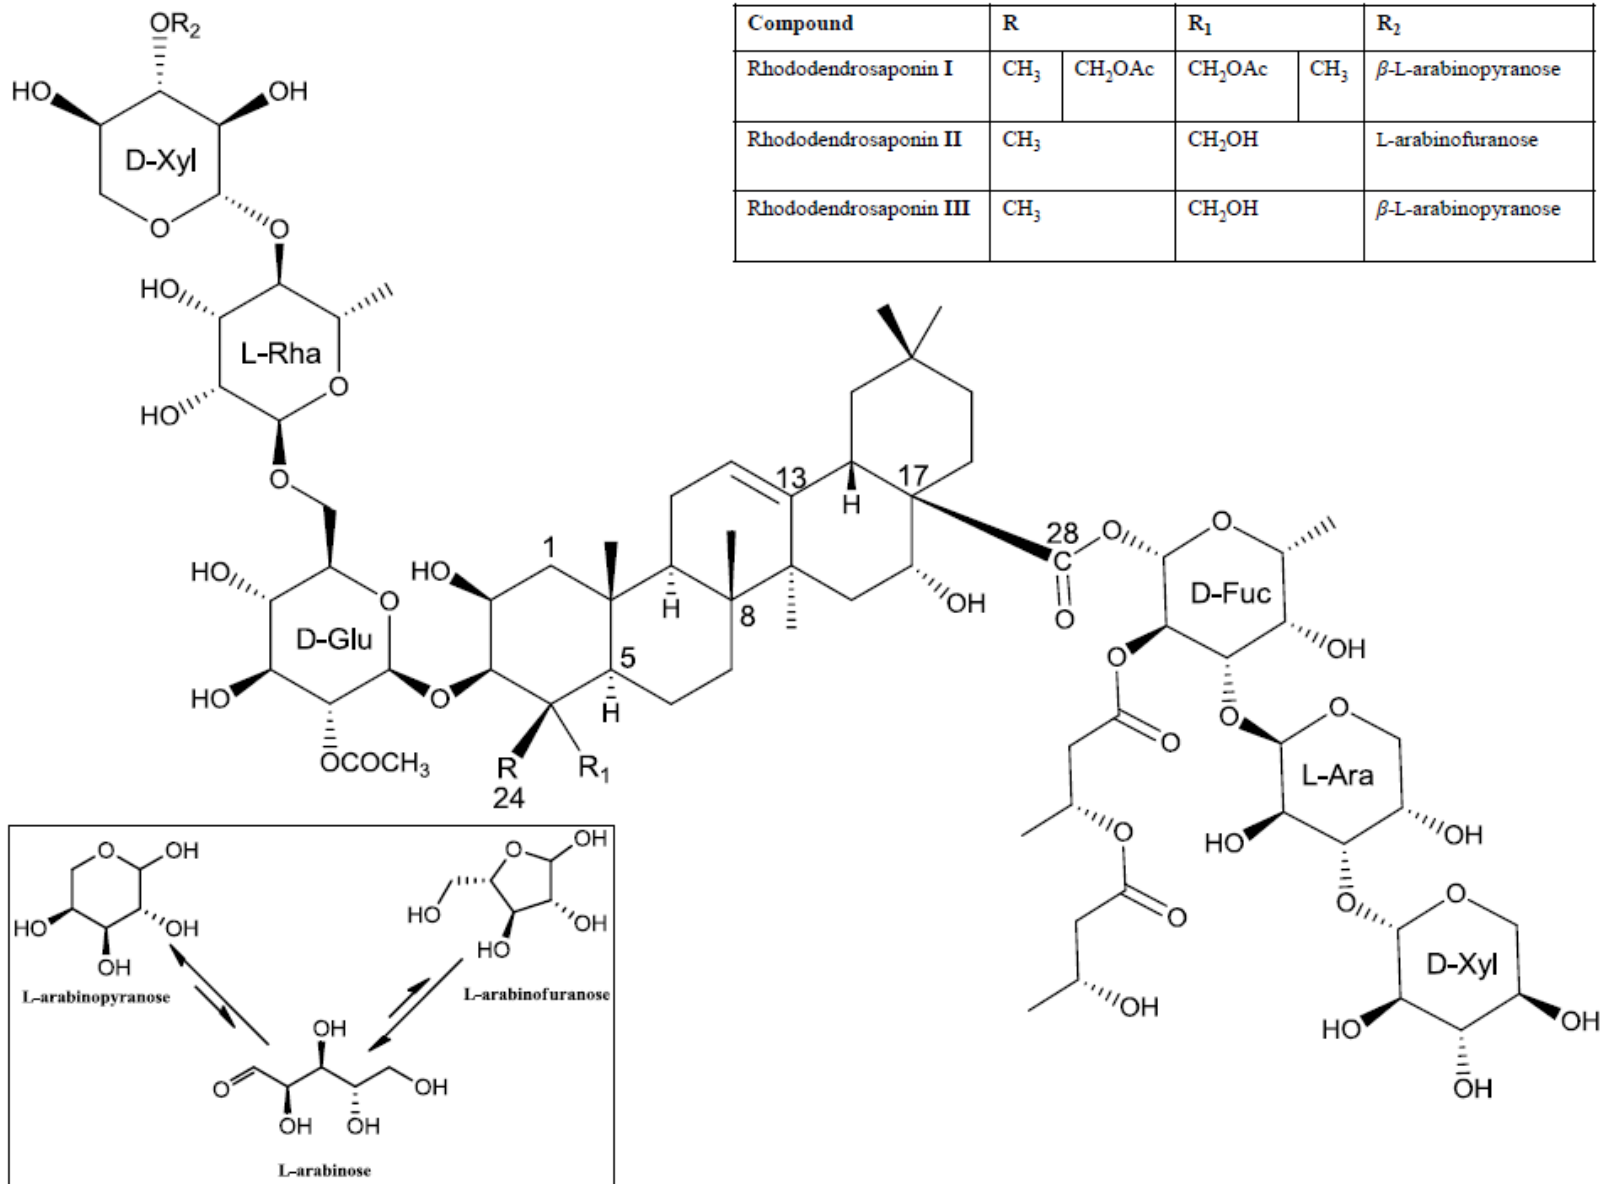

- Supplementary Figure 41 | The structures of rhododendrosaponins I-III based on all available data

## Molecular Modeling

- The 3D structure of the major glycoside, rhododendrosaponins **III** was minimized using OPLS\_2005 with extended cutoff; Van der Waals of 8.0 K cal/mol, Electrostatic of 20.0 K cal/mol, and H-bond of 4.0 K cal/mol. All stereogenic centers are kept fixed during the calculation. PRCG method was used with 0.05 as a convergence gradient threshold. Mixed torsional/low-mode sampling was used for conformational analysis with 1000 number of steps. PyMol 1.4 was used to generate the 3D surface with element color scheme. Despite the presence of similarity to previously reported natural products, the rarity of the source, the exceptional activity, and the presence of the uncommon Amadori-type isomerism make this group of metabolites unique.

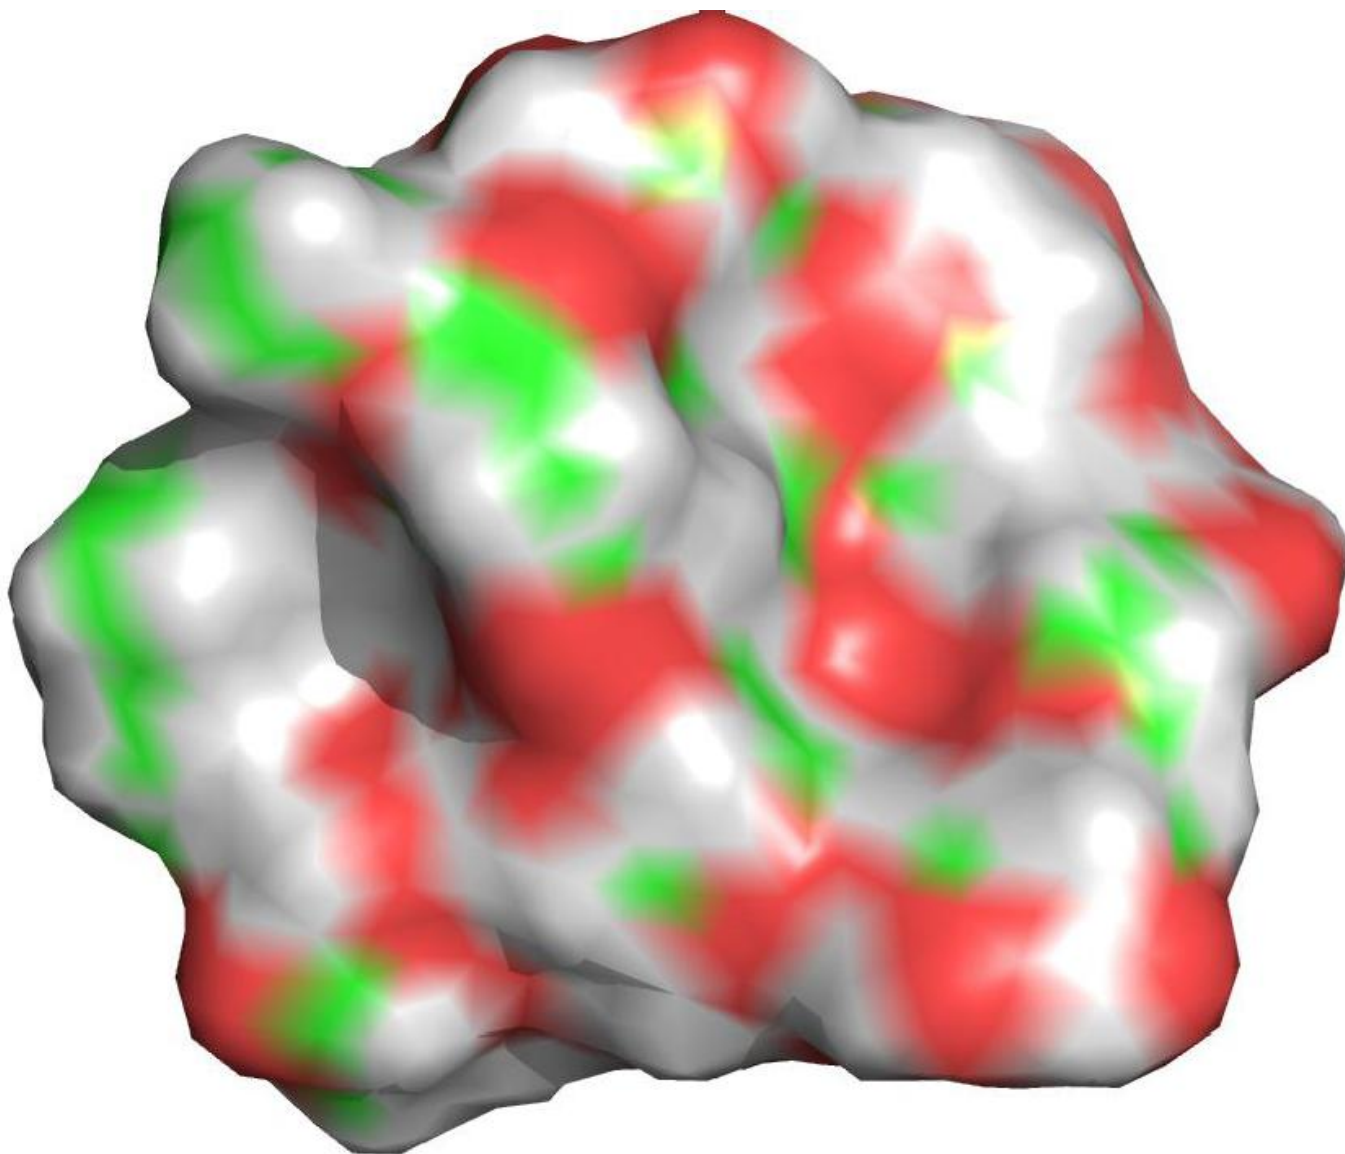

**- Supplementary Figure 42 | The minimized 3D structure surface generated by PyMol 1.4 for the major glycoside, rhododendrosaponin III, red represents oxygen while green and grey represent carbon and hydrogen.**



## HCV activity for the Rhododendrosaponins I-III

- Rhododendrosaponins **I-III** were evaluated at six different concentrations for anti-HCV activity and end point determination in Huh-7 replicon Cells. Huh-7 B cells containing HCV genotype 1 replicon RNA were seeded in a 96-well plate at 3,000 cells/well and the compounds were added in dose response at 10, 3, 1, 0.3, 0.1, and 0.03 µg/mL in triplicate immediately after seeding. Following five days incubation (37 °C, 5% CO<sub>2</sub>), total cellular RNA was isolated using the Manual Perfect Pure RNA 96 Cell Vac kit from 5 prime. Replicon RNA and an internal Control (TaqMan rRNA control reagent, Applied Biosystems) were amplified in a single step multiple Real Time RT-PCR assay.

**- Table 3 | Anti-HCV activity of rhododendrosaponins I-III in Huh-7 replicon cells**

| Sample Code            | Concentration<br>µg/mL | ΔCt<br>HCV | ΔCt<br>rRNA | % Inhibition |         | EC <sub>50</sub><br>µg/mL | EC <sub>90</sub><br>µg/mL | CC <sub>50</sub><br>µg/mL |
|------------------------|------------------------|------------|-------------|--------------|---------|---------------------------|---------------------------|---------------------------|
|                        |                        |            |             | HCV          | rRNA    |                           |                           |                           |
| RS-446                 | 0.3                    | 0.49       | 0.01        | 28.89        | 0.69    | 0.6                       | 2.3                       | >2.6                      |
|                        | 0.8                    | 1.53       | -0.57       | 65.18        | -47.93  |                           |                           |                           |
|                        | 2.6                    | 4.28       | -0.63       | 94.79        | -54.19  |                           |                           |                           |
| Rhododendrosaponin I   | 0.03                   | -0.66      | -1.10       | -57.78       | -113.35 | 0.2                       | 0.6                       | 7.0                       |
|                        | 0.1                    | -0.22      | -0.89       | -16.69       | -85.39  |                           |                           |                           |
|                        | 0.3                    | 2.60       | -0.44       | 83.37        | -35.22  |                           |                           |                           |
|                        | 1.0                    | 5.35       | -0.85       | 97.51        | -79.51  |                           |                           |                           |
|                        | 3.0                    | 7.08       | -0.21       | 99.25        | -15.35  |                           |                           |                           |
|                        | 10.0                   | 7.04       | 6.04        | 99.23        | 98.46   |                           |                           |                           |
| Rhododendrosaponin II  | 0.03                   | -0.07      | -0.23       | -5.20        | -16.96  | 0.2                       | 0.9                       | 7.4                       |
|                        | 0.1                    | -0.08      | -0.99       | -5.68        | -98.19  |                           |                           |                           |
|                        | 0.3                    | 1.84       | -1.18       | 71.89        | -126.52 |                           |                           |                           |
|                        | 1.0                    | 3.67       | -0.97       | 92.10        | -95.02  |                           |                           |                           |
|                        | 3.0                    | 7.44       | 0.15        | 99.41        | 10.05   |                           |                           |                           |
|                        | 10.0                   | 7.07       | 1.96        | 99.24        | 74.16   |                           |                           |                           |
| Rhododendrosaponin III | 0.03                   | -0.63      | -1.81       | -54.19       | -249.27 | 0.2                       | 0.3                       | 5.3                       |
|                        | 0.1                    | -0.42      | -0.98       | -33.67       | -96.38  |                           |                           |                           |
|                        | 0.3                    | 3.95       | 0.59        | 93.49        | 33.40   |                           |                           |                           |
|                        | 1.0                    | 5.36       | -0.75       | 97.53        | -67.91  |                           |                           |                           |
|                        | 3.0                    | 6.88       | 0.44        | 99.14        | 26.05   |                           |                           |                           |
|                        | 10.0                   | 7.50       | 6.27        | 99.44        | 98.69   |                           |                           |                           |

- The antiviral effectiveness of the compounds was calculated by subtracting the threshold RT-PCR cycle of the test compound from the threshold RT-PCR cycle of the non-drug control ( $\Delta\text{Ct}_{\text{HCV}}$ ). A  $\Delta\text{Ct}$  of 3.3 equals a 1-log reduction (equal to 90% less starting material) in replicon RNA levels. The cytotoxicity of the compounds was also calculated by using the  $\Delta\text{Ct}$  rRNA values. RS-446 (2'-C-Me-C) , was used as the control. To determine  $\text{EC}_{50}$  and  $\text{IC}_{50}$  values,  $\Delta\text{Ct}$  values were first converted into fractions of starting material and then were used to calculate the percent inhibition. The activity profile clearly revealed significant potency for these metabolites comparable to the recently approved drug Telaprevir ( $\text{EC}_{50}$  0.1-0.2  $\mu\text{g}/\text{mL}$ ) and a therapeutic window warranted to inspire further investigations.

# Mass Spectrum Molecular Formula Report

## Analysis Info

Analysis Name J:\MKNa\Na\N77951-6-16-3-4\_5\_01\_11741.d  
Method LCMS-rutin-pos.m  
Sample Name N77951-6-16-3-4  
Comment

Acquisition Date 10/4/2007 7:35:13 PM

Operator Administrator  
Instrument micrOTOF 93

## Acquisition Parameter

|             |          |                |          |                    |        |
|-------------|----------|----------------|----------|--------------------|--------|
| Source Type | ESI      | Ion Polarity   | Positive | Set Corrector Fill | 52 V   |
| Scan Range  | n/a      | Capillary Exit | 80.0 V   | Set Pulsar Pull    | 402 V  |
| Scan Begin  | 50 m/z   | Hexapole RF    | 200.0 V  | Set Pulsar Push    | 402 V  |
| Scan End    | 3000 m/z | Skimmer 1      | 50.0 V   | Set Reflector      | 1305 V |
|             |          | Hexapole 1     | 21.9 V   | Set Flight Tube    | 9000 V |
|             |          |                |          | Set Detector TOF   | 2150 V |

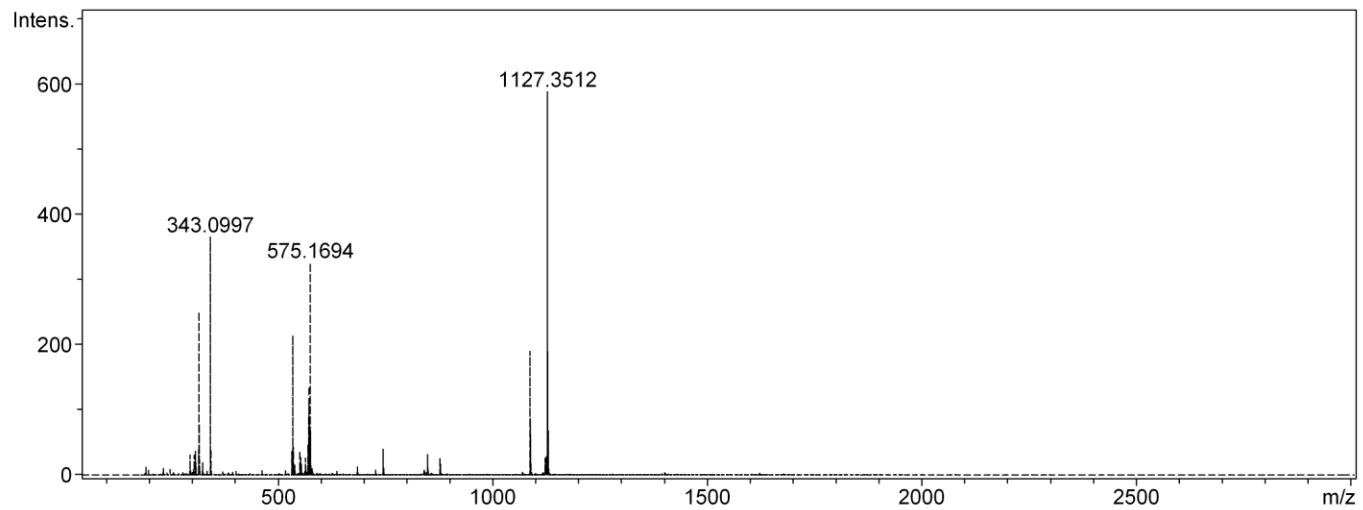

+MS, 11.5-13.3min #(767-892)

| Sum Formula         | Sigma | m/z      | Err [ppm] | Mean Err [ppm] | rdb   | N Rule | e <sup>-</sup> |
|---------------------|-------|----------|-----------|----------------|-------|--------|----------------|
| C 26 H 32 Na 1 O 13 | 0.15  | 575.1735 | 7.07      | 6.98           | 10.50 | ok     | even           |

- Supplementary Figure 43 | LC- HRESIMS Spectrum of Compound IV

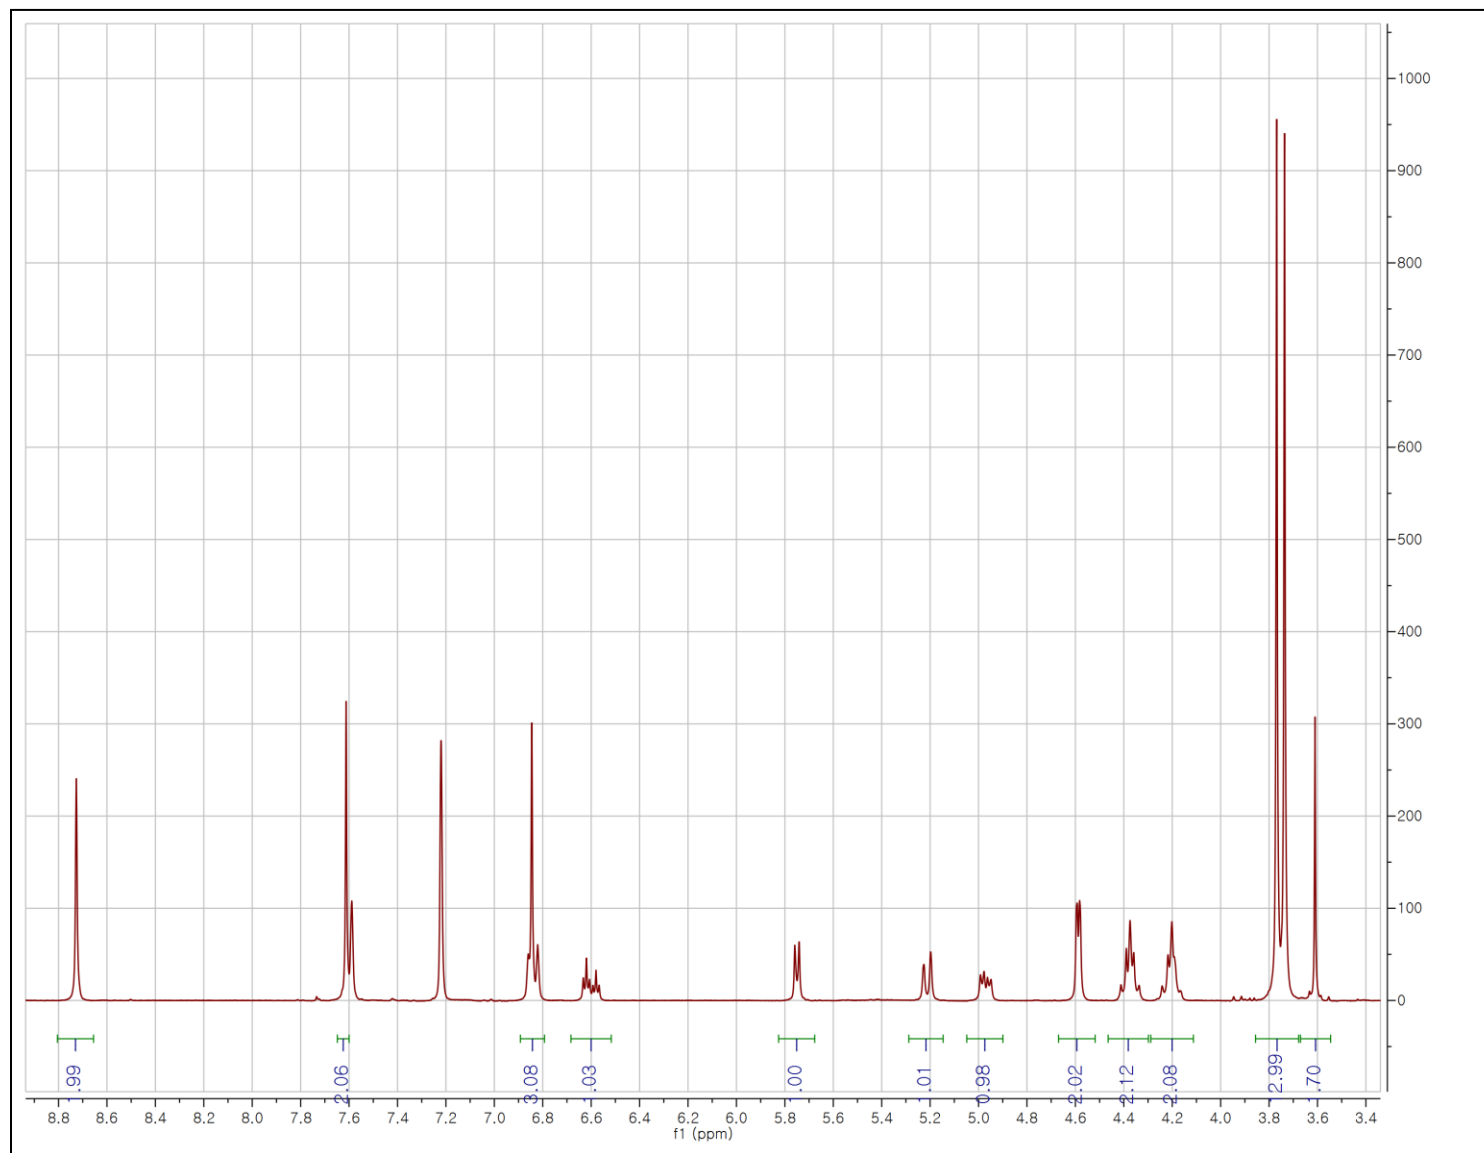

**- Supplementary Figure 44 | <sup>1</sup>H NMR Spectrum of Compound IV in Pyridine-*d*<sub>5</sub> (400 MHz)**

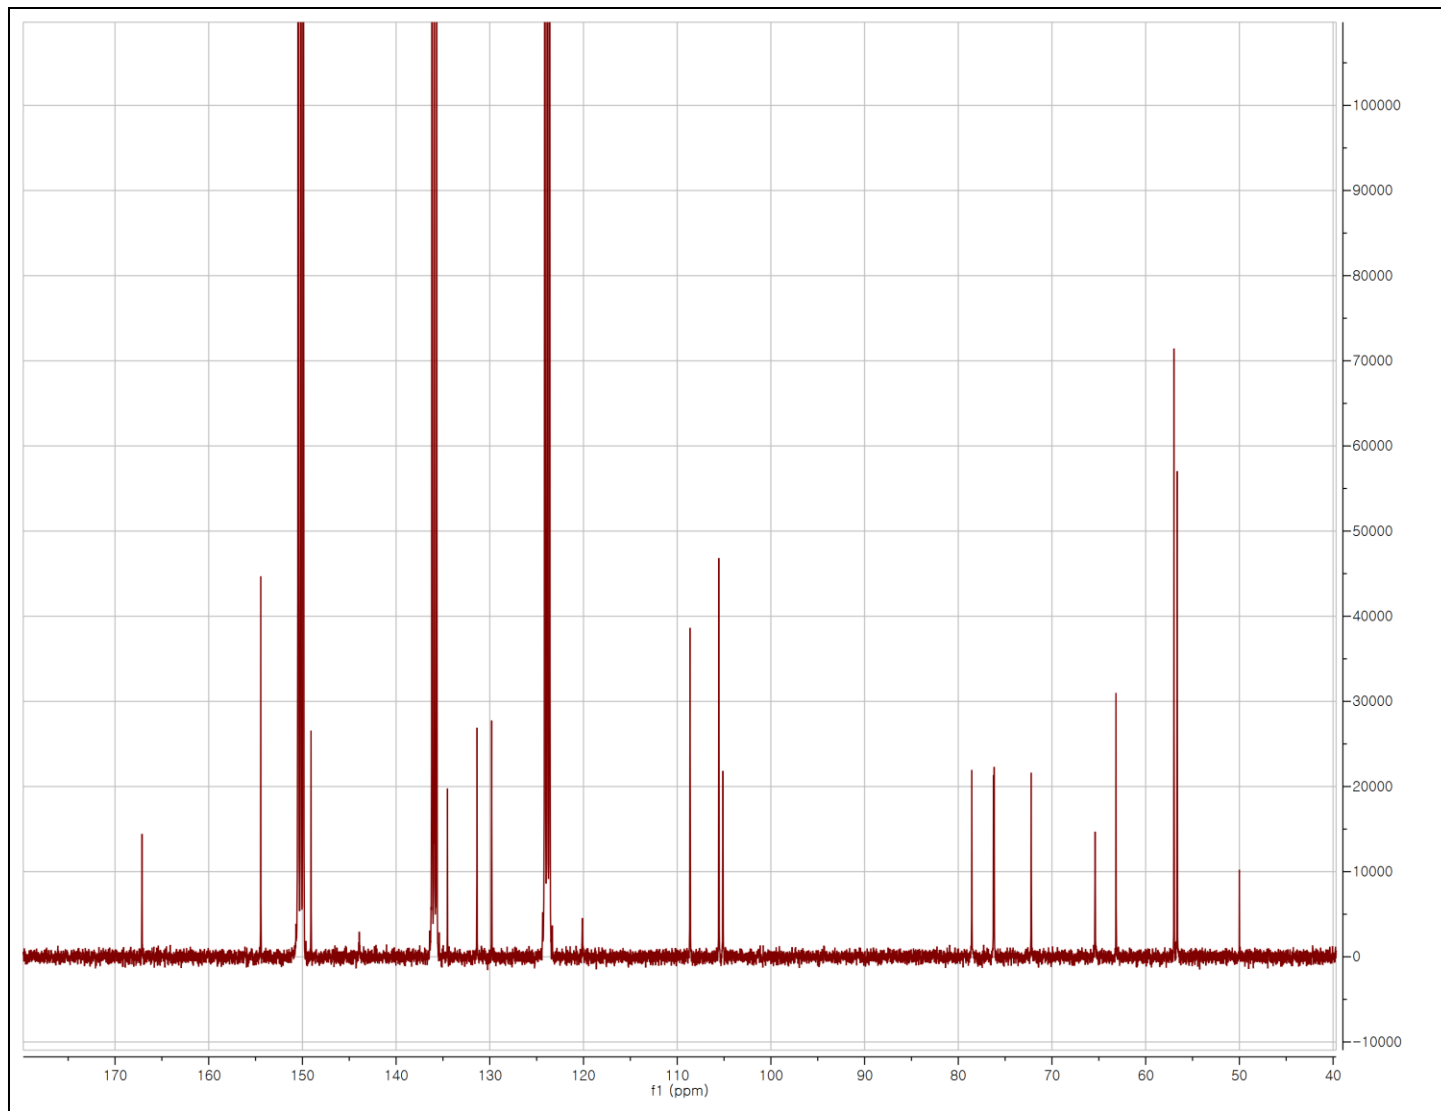

- Supplementary Figure 45 |  $^{13}\text{C}$  NMR Spectrum of Compound IV in  $\text{Pyridine-}d_5$  (100 MHz)

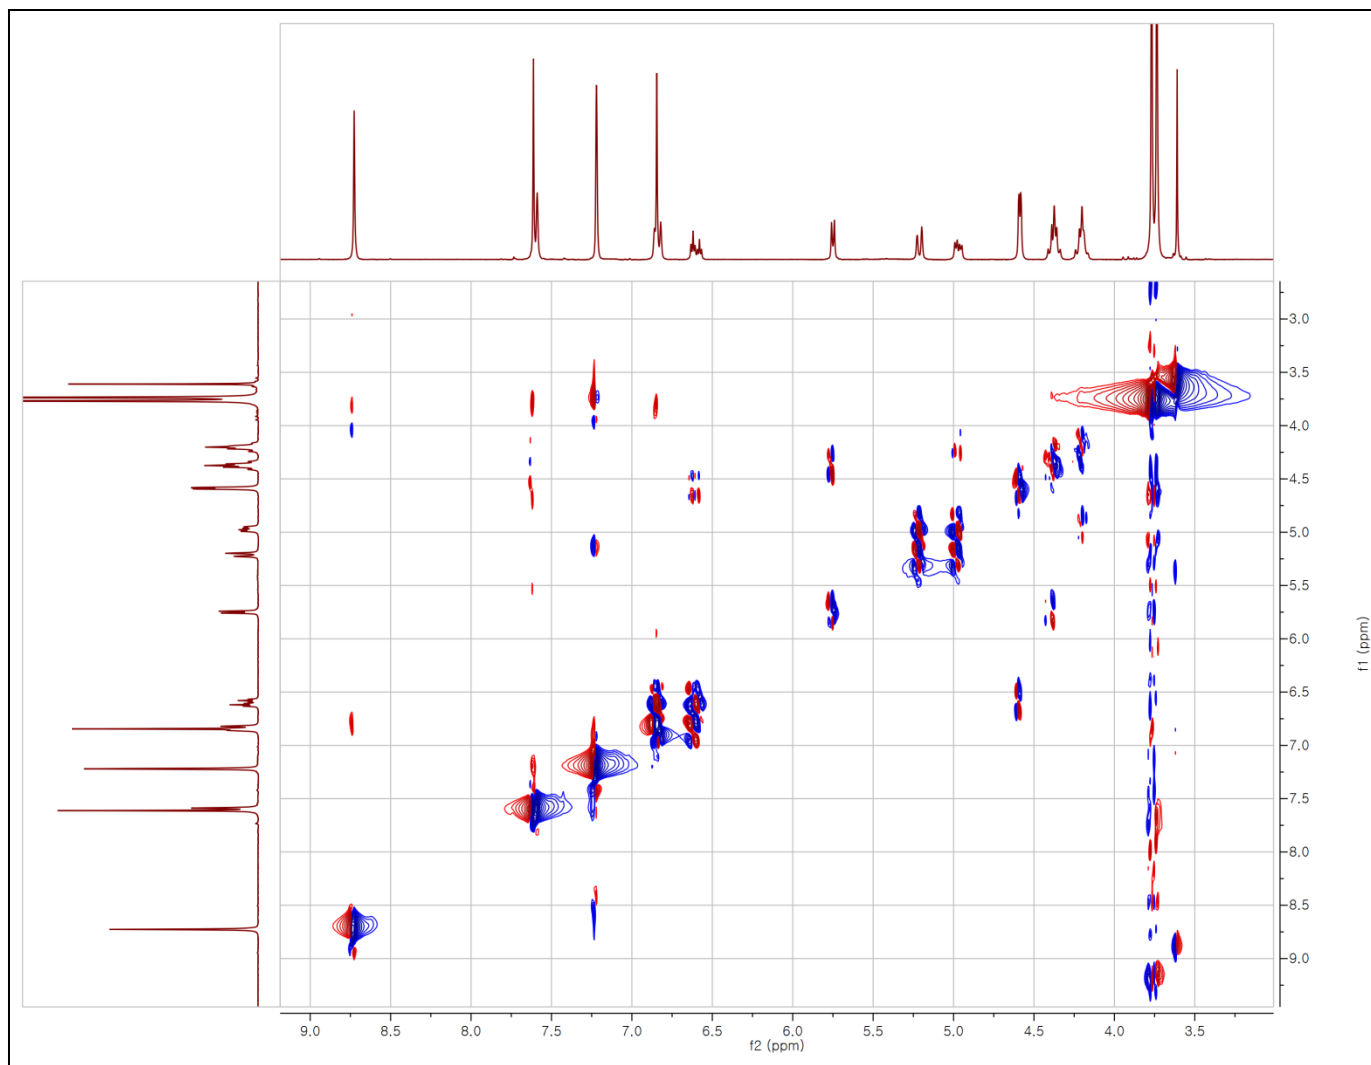

- Supplementary Figure 46 | COSY Spectrum of Compound IV in Pyridine-*d*<sub>5</sub> (400 MHz)

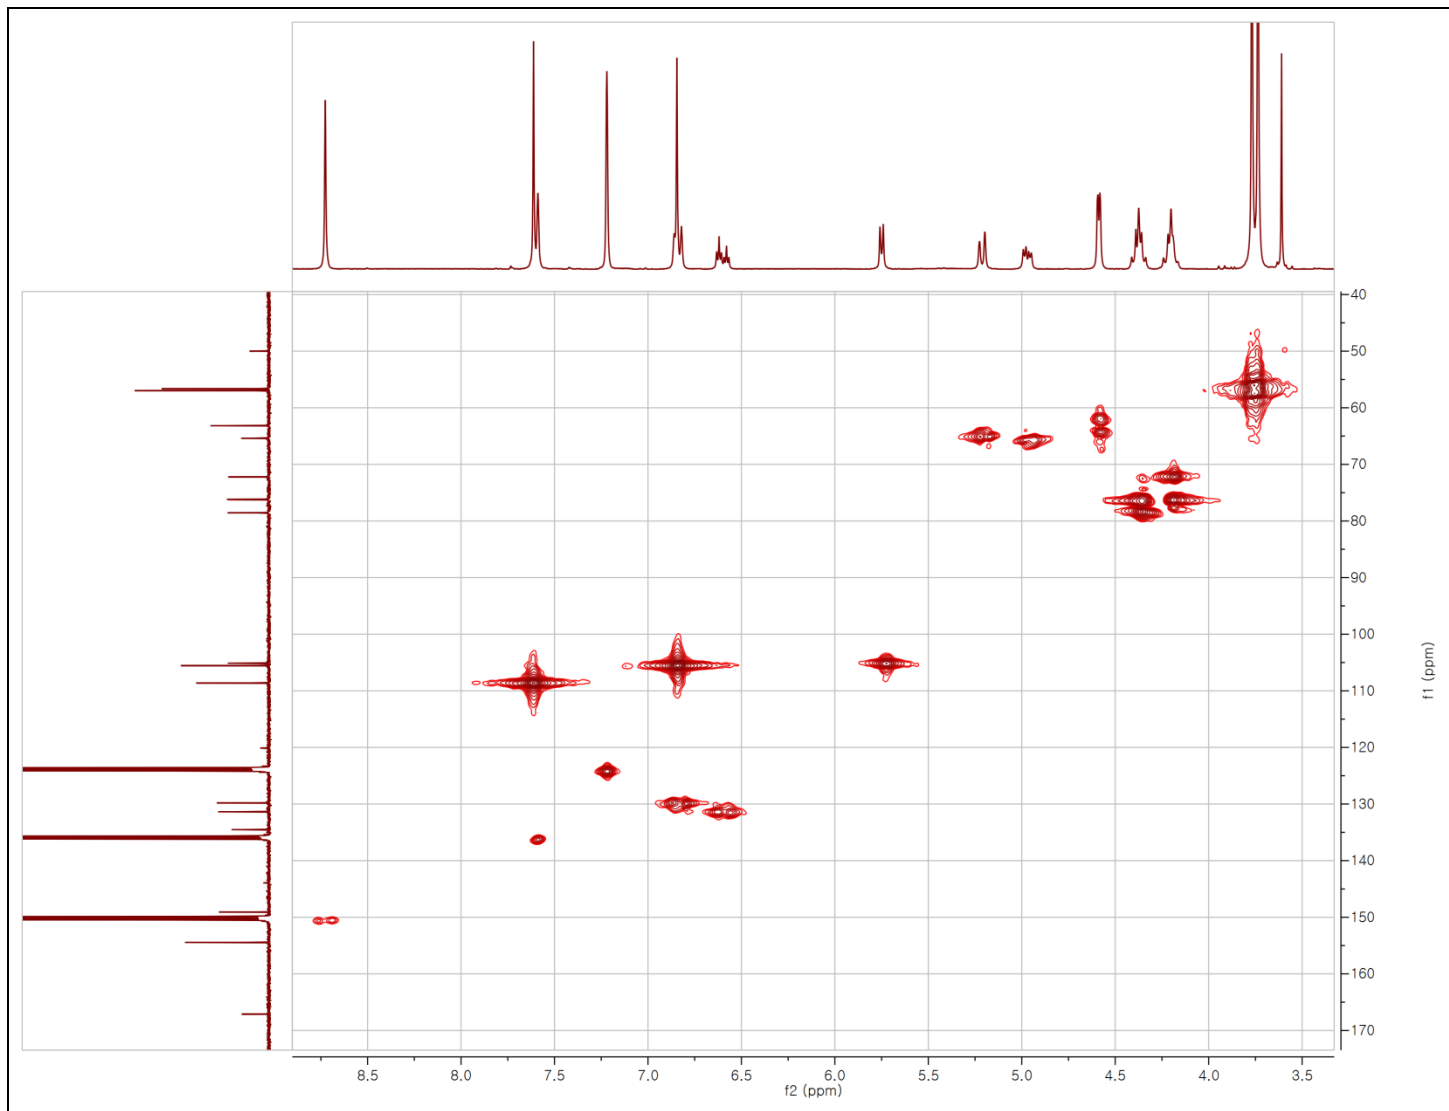

- Supplementary Figure 47 | HMQC Spectrum of Compound IV in Pyridine- $d_5$  (400 MHz)



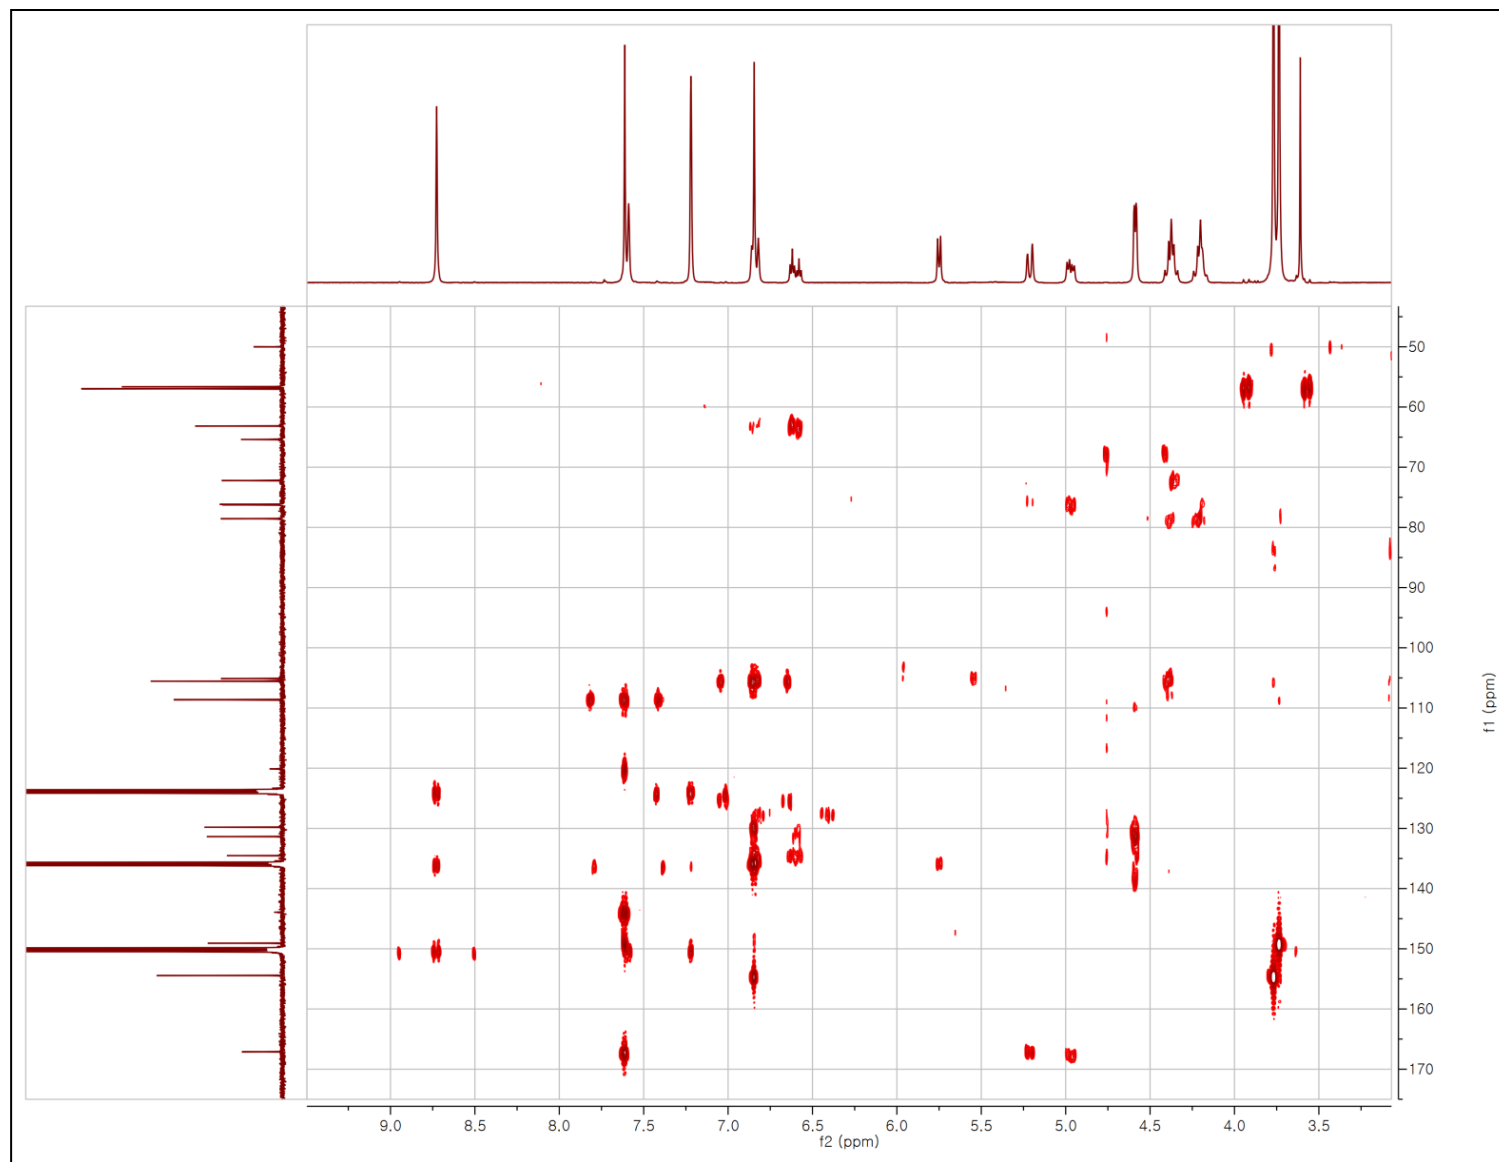

- Supplementary Figure 48 | HMBC Spectrum of Compound IV in Pyridine- $d_5$  (400 MHz)

## Mass Spectrum Molecular Formula Report

### Analysis Info

Analysis Name J:\MKNa\Na\N77951-6-16-5(1)\_71\_01\_11541.d  
Method LCMS-rutin-pos.m  
Sample Name N77951-6-16-5(1)  
Comment

Acquisition Date 9/25/2007 5:23:04 AM

Operator Administrator  
Instrument micrOTOF 93

### Acquisition Parameter

Source Type ESI Ion Polarity Positive  
Scan Range n/a Capillary Exit 80.0 V  
Scan Begin 50 m/z Hexapole RF 200.0 V  
Scan End 3000 m/z Skimmer 1 50.0 V  
Hexapole 1 21.9 V

Set Corrector Fill 52 V  
Set Pulsar Pull 402 V  
Set Pulsar Push 402 V  
Set Reflector 1305 V  
Set Flight Tube 9000 V  
Set Detector TOF 2150 V

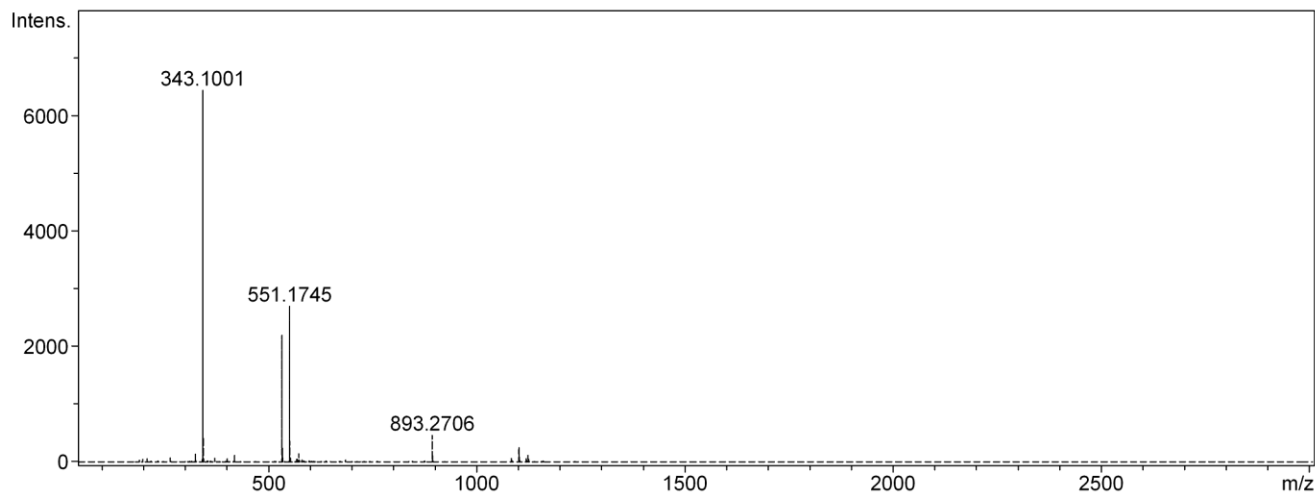

+MS, 11.8-13.3min #(791-890)

| Sum Formula    | Sigma | m/z      | Err [ppm] | Mean Err [ppm] | rdb   | N Rule | e <sup>-</sup> |
|----------------|-------|----------|-----------|----------------|-------|--------|----------------|
| C 26 H 31 O 13 | 0.09  | 551.1759 | 2.61      | 2.07           | 11.50 | ok     | even           |

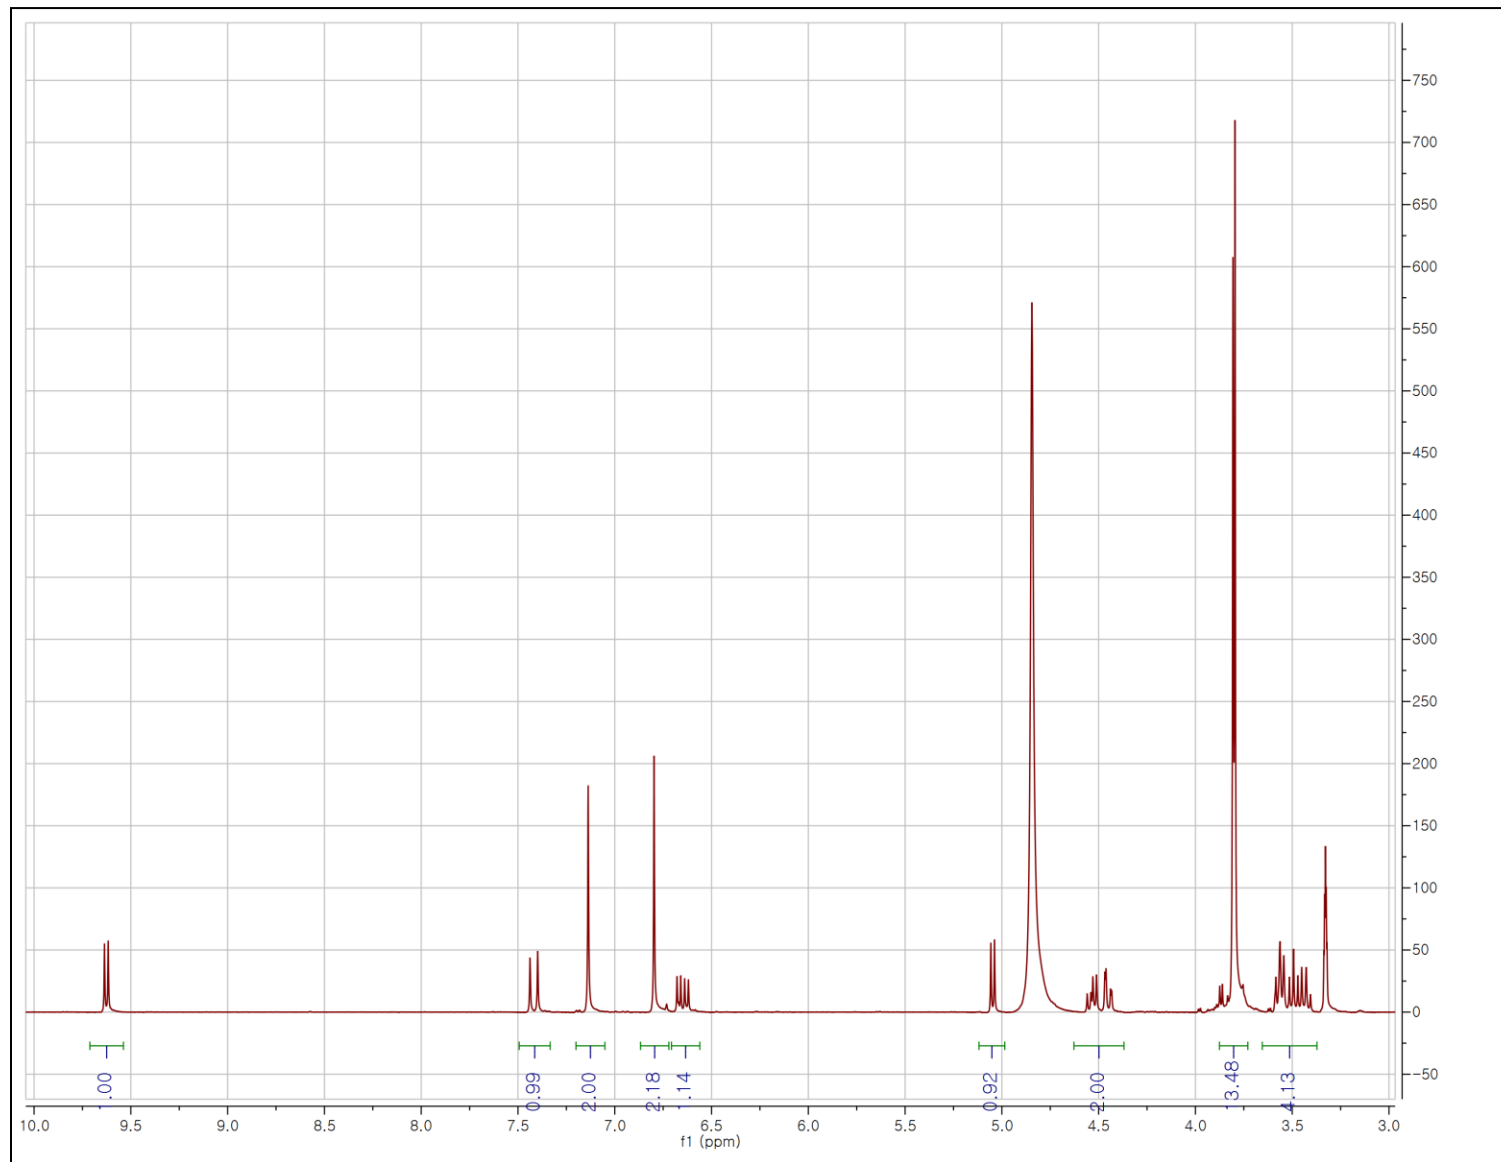

- Supplementary Figure 50 | <sup>1</sup>H NMR Spectrum of Compound V in Methanol-d<sub>4</sub> (400 MHz)

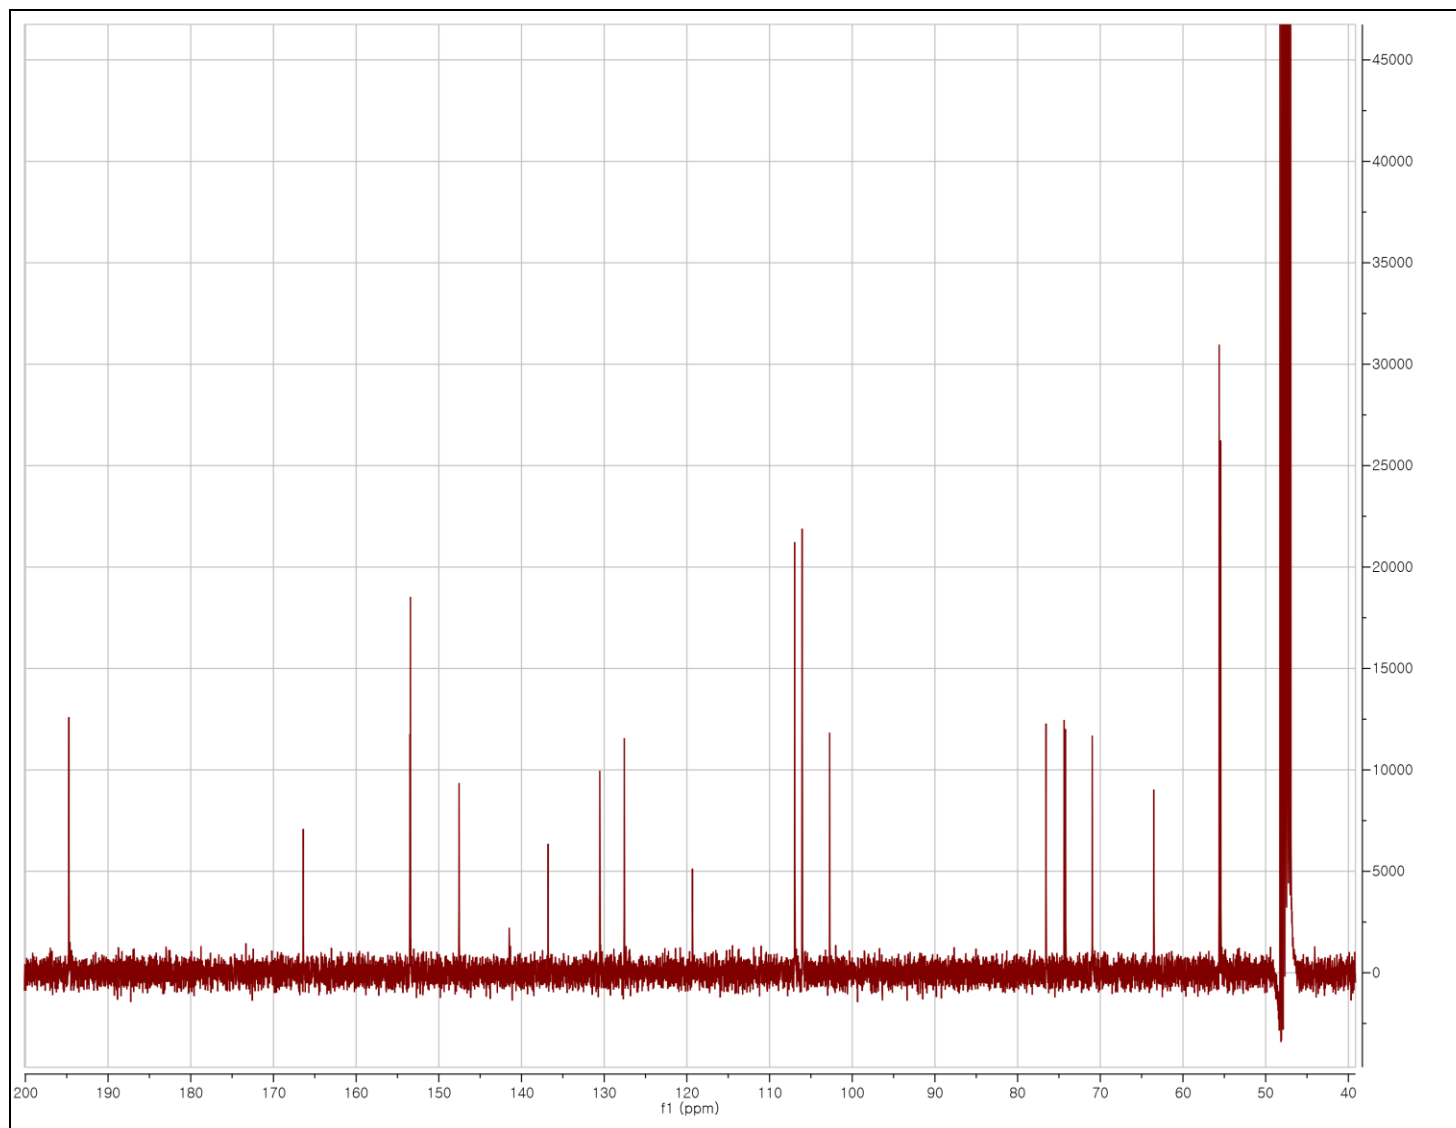

- Supplementary Figure 51 |  $^{13}\text{C}$  NMR Spectrum of Compound V in Methanol- $d_4$  (100 MHz)

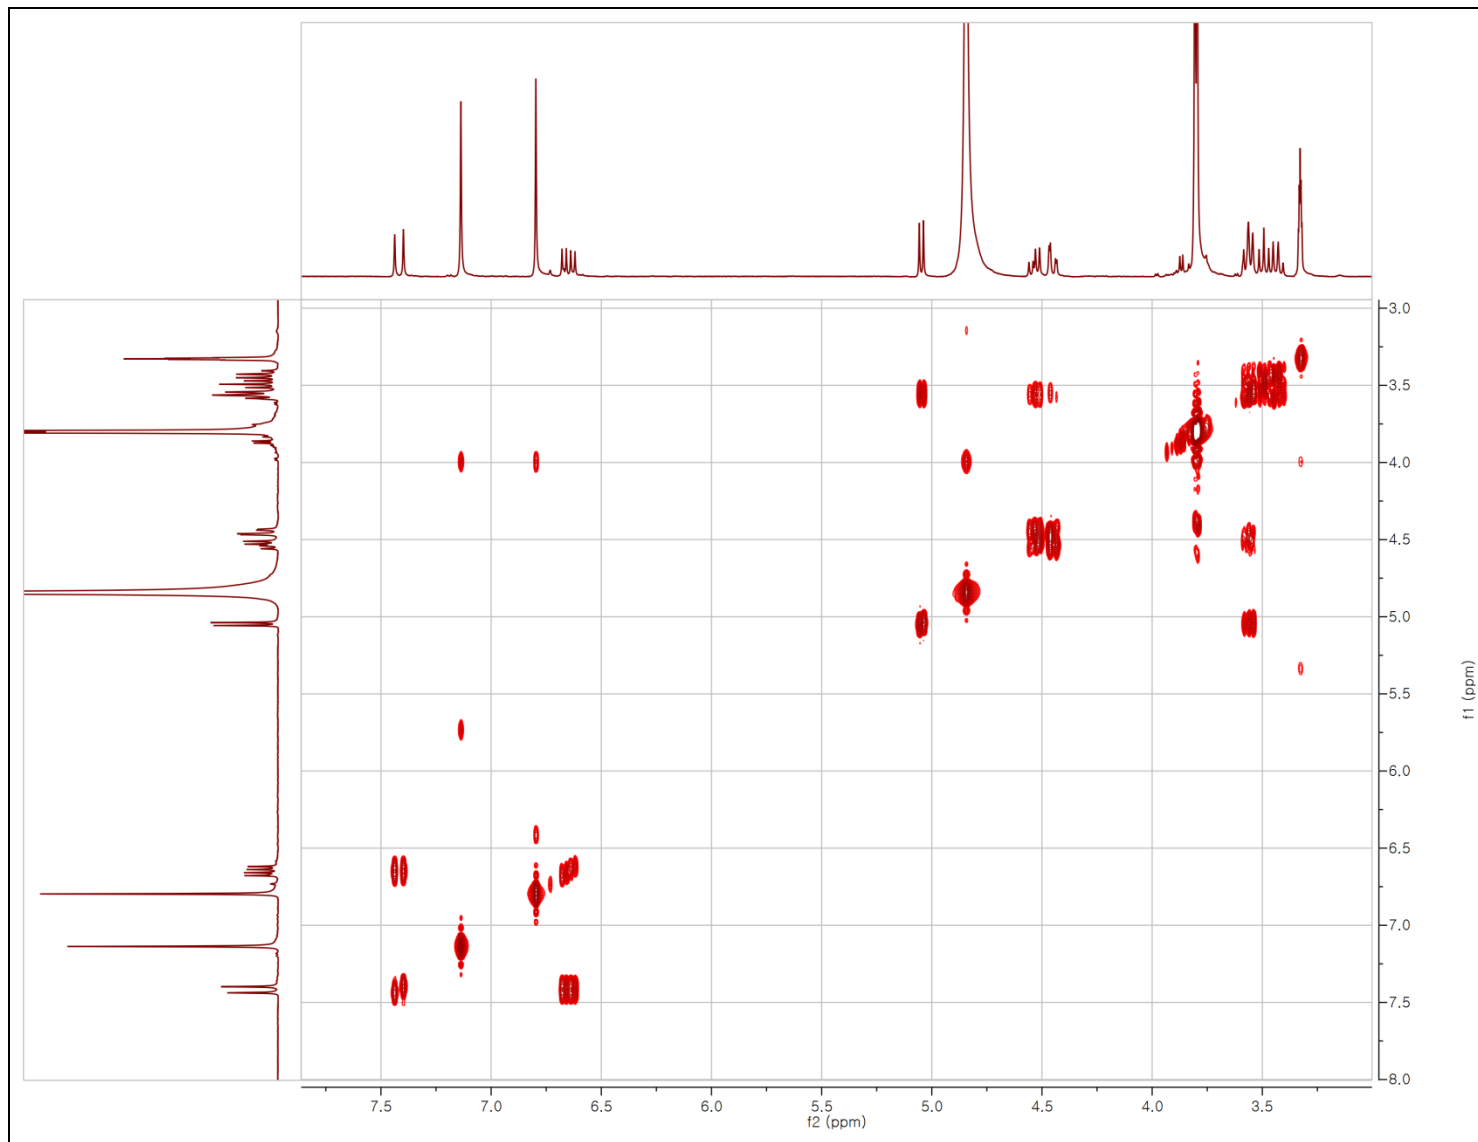

- Supplementary Figure 52 | COSY Spectrum of Compound V in Methanol-*d*<sub>4</sub> (400 MHz)

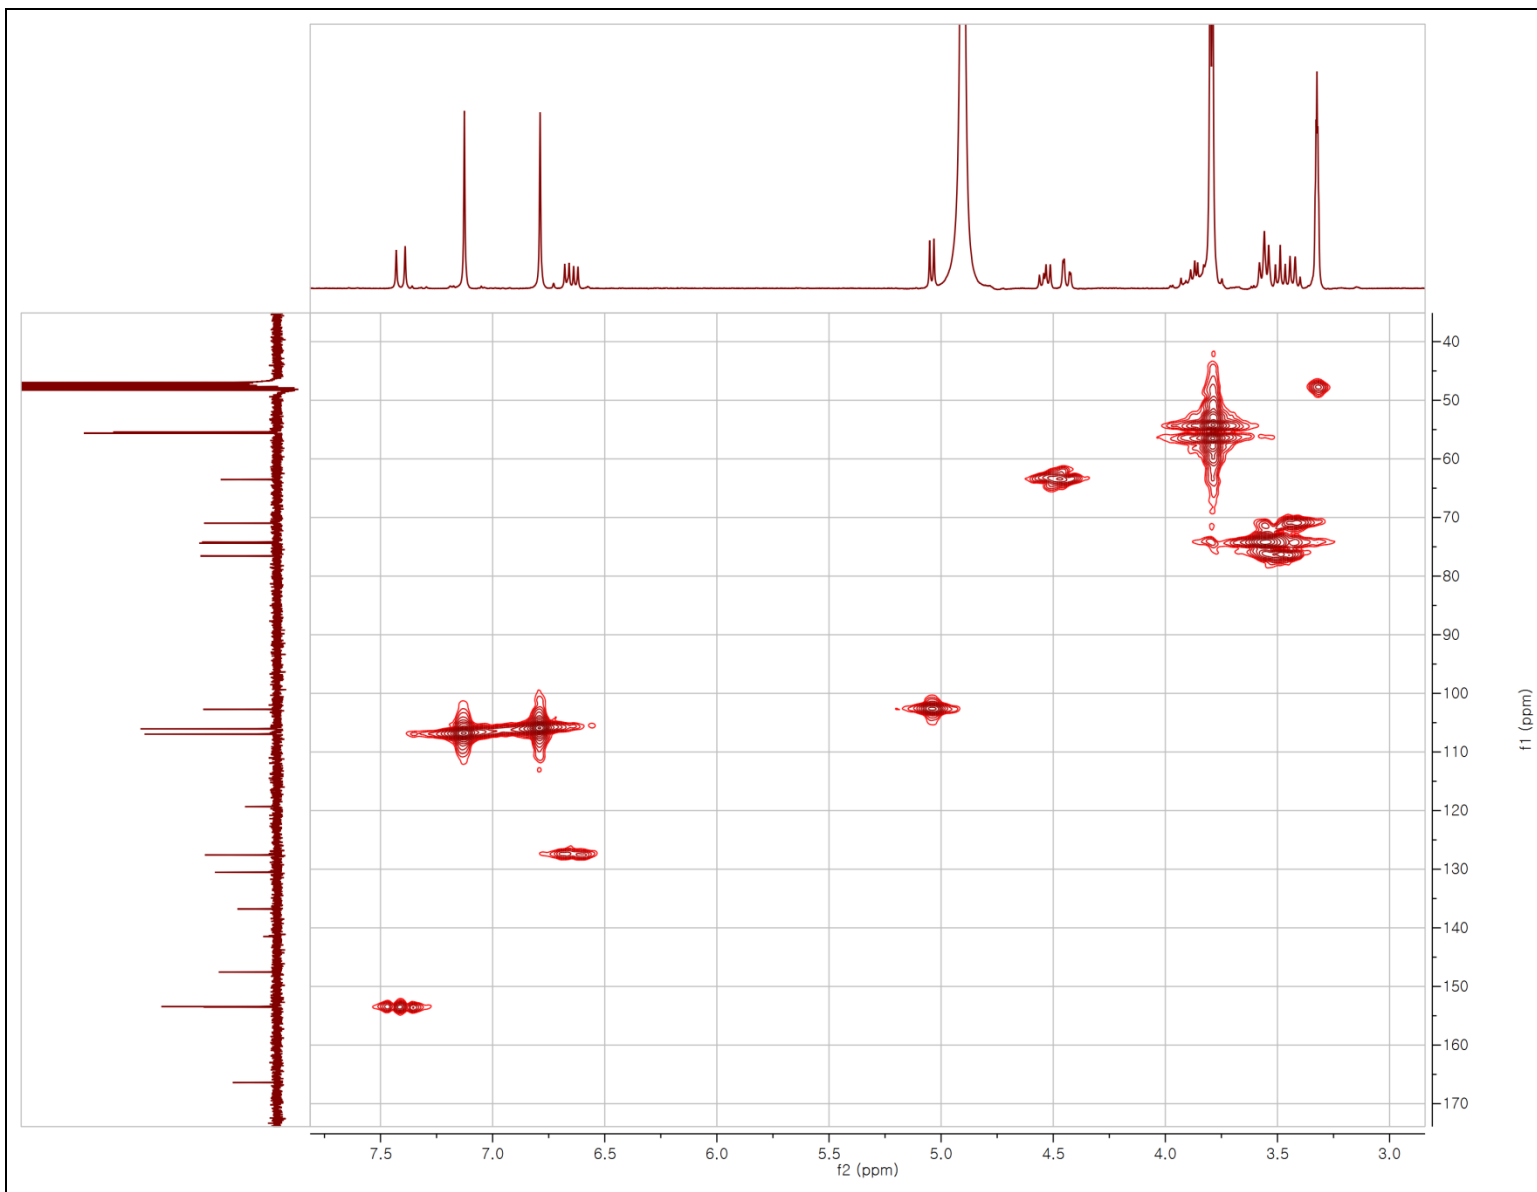

- Supplementary Figure 53 | HMQC Spectrum of Compound V in Methanol- $d_4$  (400 MHz)

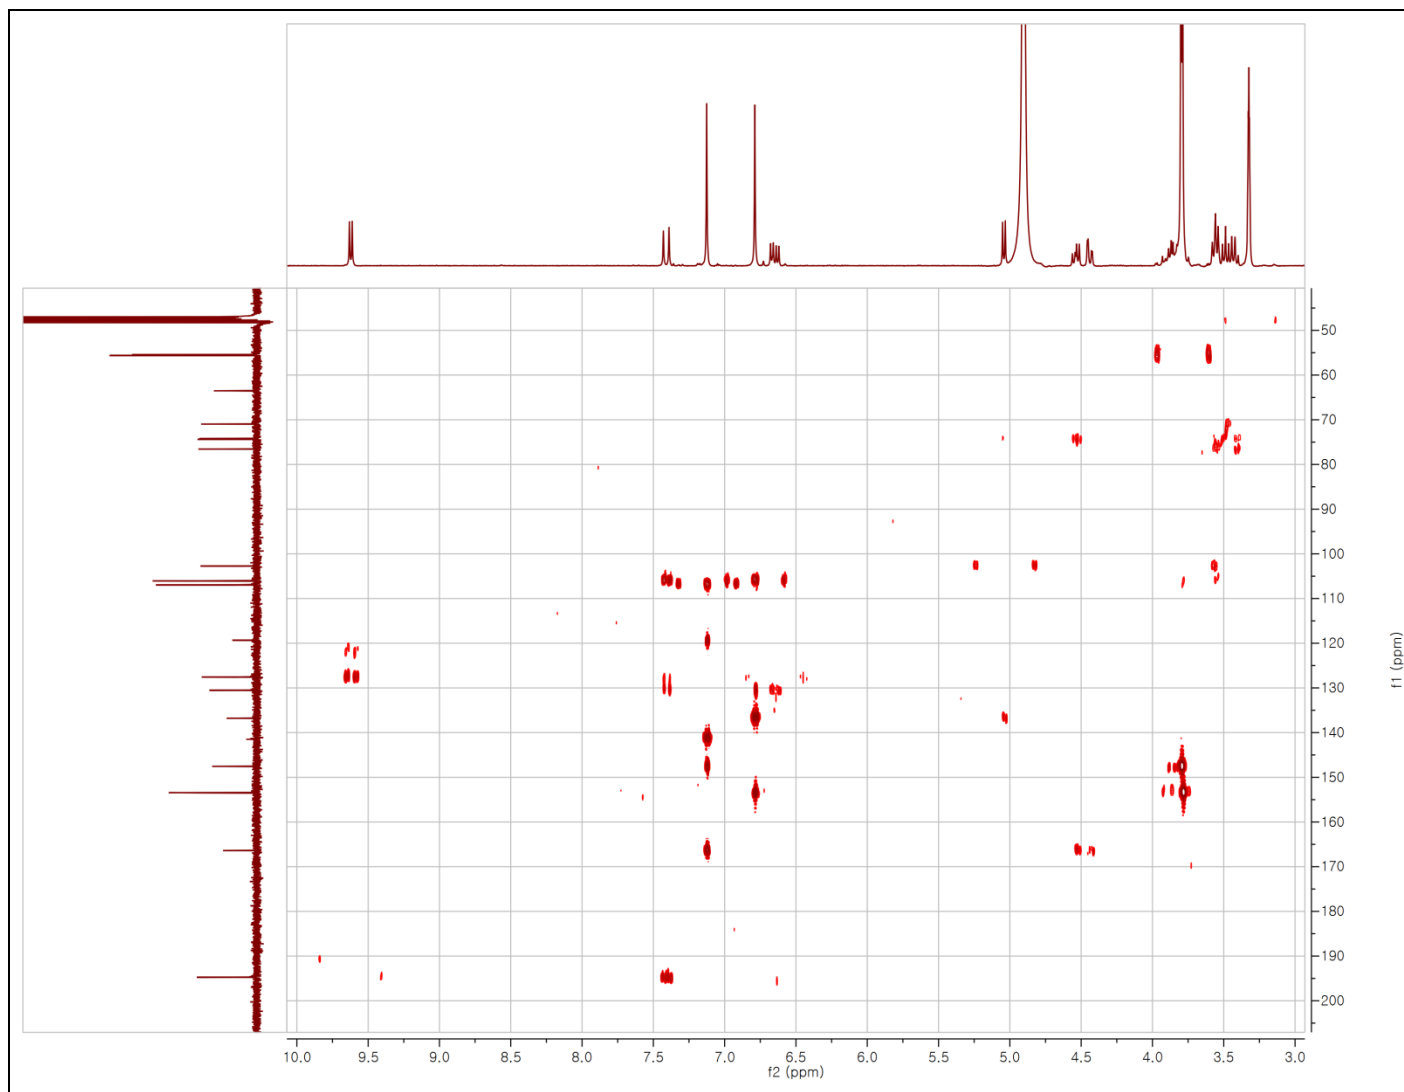

- Supplementary Figure 54 | HMBC Spectrum of Compound V in Methanol- $d_4$  (400 MHz)

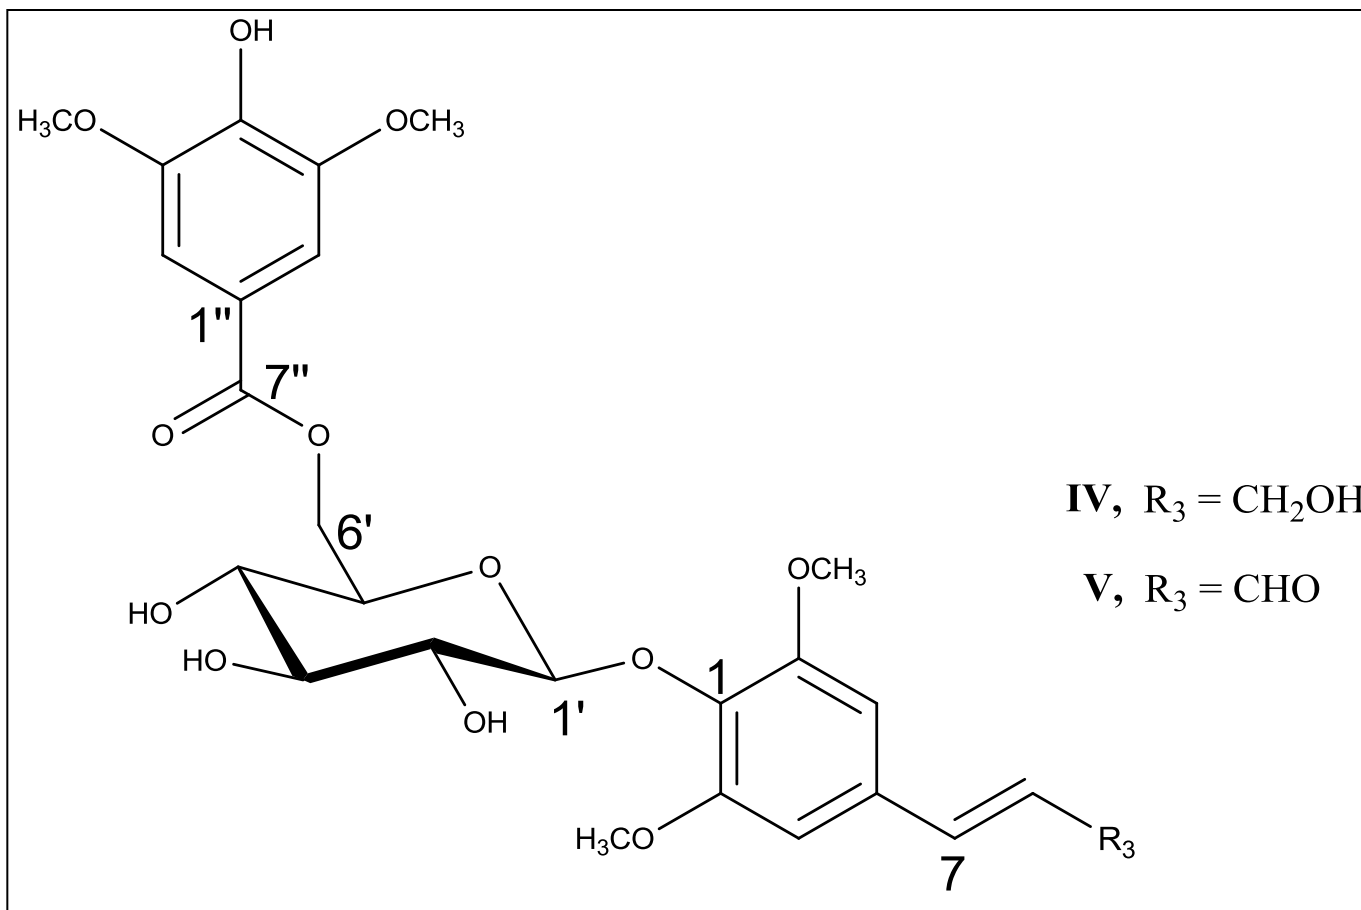

- Supplementary Figure 55 | The proposed structures of IV and V



**- Table 3 | Docking scores of compounds IV and V**

| Protein / Ligand  | 1T48          | 1T49          | 1T4J         |
|-------------------|---------------|---------------|--------------|
| (A) 350 $\mu$ M   | -11.36 (1.07) | -8.42 (1.18)  | -7.86 (1.57) |
| (B) 22 $\mu$ M    | -14.47 (1.02) | -10.65 (1.14) | -9.96 (1.08) |
| (C) 8 $\mu$ M     | -14.52 (1.28) | -10.92 (0.99) | -9.73 (1.23) |
| (IV) 81.0 $\mu$ M | -11.45        | -9.13         | -9.09        |
| (V) 25.9 $\mu$ M  | -10.46        | -8.96         | -8.55        |

Compounds A, B, and C are co-crystallized ligands with 1T48, 1T49 and 1T4J, respectively. Numbers in the parentheses next to docking scores indicate the RMS deviation values. Numbers next to ligand entries show their PTP1B inhibition potency.

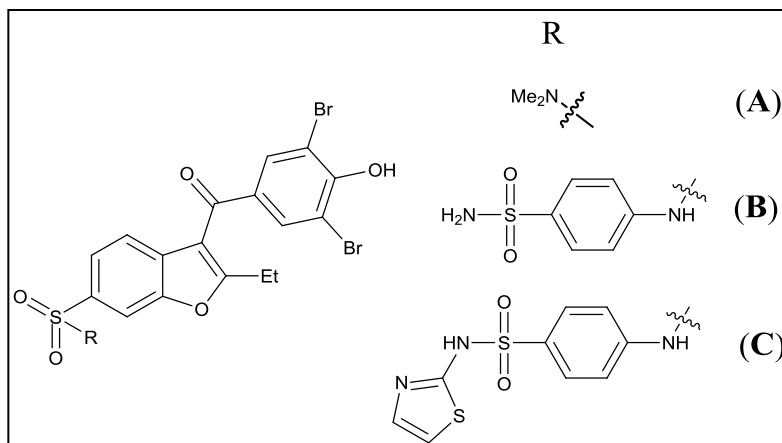

**- Supplementary Figure 56 | The structures of legends A, B, and C**

## Additional References

- 1- Reddy, B. A. Digitalis therapy in patients with congestive heart failure. *Int. J. Pharmaceut. Sci. Rev. and Res.* **2010**, *3*, 90-95.
- 2- Heinrich, M., Lee, T. H. Galanthamine from snowdrop--the development of a modern drug against Alzheimer's disease from local Caucasian knowledge. *J. Ethnopharmacol.* **2004**, *92*, 147-62.
- 3- Rates, S. M. K. Plants as source of drugs. *Toxicon* **2001**, *39*, 603-613.
- 4- Ajikumar, P. K., Xiao, W. H., Tyo, K. E. J., Wang, Y., Simeon, F., Leonard, E., Mucha, O., Phon, T. H., Pfeifer, B., Stephanopoulos, G. Isoprenoid pathway optimization for Taxol precursor overproduction in *Escherichia coli*. *Science* **2010**, *330*, 70 – 74.
- 5- <http://www.hepatitis-central.com/>; established since 1994, has been dedicated to providing in-depth information for Hepatitis C patients and their families).
- 6- Stuyver, L. J., Whitaker, T., McBrayer, T. R., Hernandez-Santiago, B. I., Lostia, S., Tharnish, P. M., Ramesh, M., Chu, C. K., Jordan, R., Shi, J., Rachakonda, S., Watanabe, K. A., Otto, M. J., Schinazi, R. F. Ribonucleoside analogue that blocks replication of bovine viral diarrhea and hepatitis C viruses in culture. *Antimicrob. Agents Chemother.* **2003**, *47*, 244-254.
- 7- Schrödinger Suite 2011 Induced Fit Docking protocol; Glide version 5.7, Schrödinger, LLC, New York, NY, 2011; Prime version 3.0, Schrödinger, LLC, New York, NY, 2011.
- 8- Schrödinger Suite 2011 Protein Preparation Wizard; Epik version 2.2, Schrödinger, LLC, New York, NY, 2011; Impact version 5.7, Schrödinger, LLC, New York, NY, 2011; Prime version 3.0, Schrödinger, LLC, New York, NY, 2011.
- 9- Cui, L. et al. Protein tyrosine phosphatase 1B inhibitors from Morus root bark. *Bioorganic & Medicinal Chemistry Letters* **2006**, *16*, 1426-1429.
- 10- Na, M., Jang, J., Njamen, D., Mbafor, J. T., Fomum, Z. T., Kim, B. Y., Oh, W. K., Ahn, J. S. Protein tyrosine phosphatase-1B inhibitory activity of isoprenylated flavonoids isolated from *Erythrina mildbraedii*. *J. Nat. Prod.* **2006**, *69*, 1572-1576.
